# Supplementary material for: Snowball Earths, population bottlenecks, and Prochlorococcus evolution
Source: bioRxiv or medRxiv preprint supplement (doi:10.1101/2020.11.24.395392), 2021-09-01
Supplement: Supplementary file [file media-1.pdf]

1

2

3 **Supplementary Information for**

4 **Snowball Earths, population bottlenecks, and the evolution of marine**  
5 **photosynthetic bacteria**

6

7 Hao Zhang, Ying Sun, Qinglu Zeng, Sean A. Crowe, Haiwei Luo

8

9 Haiwei Luo

10 Email: hluo2006@gmail.com

11

12 **This PDF file includes:**

13

14 Supplemental Methods

15 References

16 Figures S1 to S11

17 Tables S1 to S5

18

19 **Supplemental Methods**

20 **Table of Contents**

21 **1. Taxon sampling and gene annotation of Cyanobacteria genomes**

22 **2. Timing the evolution of *Prochlorococcus***

23 *2.1 Relaxed molecular clock method implemented in MCMCTree*

24 *2.2 Phylogenomic tree construction of Cyanobacteria*

25 Ortholog identification among oxygenic Cyanobacteria genomes

26 Phylogenomic tree construction of oxygenic Cyanobacteria based on the  
27 complete set of orthologs

28 Phylogenomic tree construction of oxygenic Cyanobacteria based on the  
29 compositionally homogeneous subset of orthologs

30 Phylogenomic tree construction of Cyanobacteria phylum based on the  
31 subset of orthologs showing compositionally homogeneity

32 Resolved phylogeny of Cyanobacteria

33 *2.3 Justification of calibrations used for the molecular dating analyses*

34 Calibration of the Nostocales group

35 Calibration of the Pleurocapsales group

36 Calibrations of the root of oxygenic Cyanobacteria

37 Calibrations of the root of Cyanobacteria phylum

38 *2.4 Selection of molecular clock model*

39 *2.5 Input sequence data for molecular clock analysis*

40 *2.6 Assessing the precisions of molecular clock analyses*

41 **3. Reconstruction of gene gain and loss processes**

42 *3.1 Using AnGST*

43 *3.2 Using BadiRate*

44 *3.3 Gene gain and loss data integration*

45 **4. Calculating the rate of nonsynonymous nucleotide substitutions leading to radical**  
46 **and conservative amino acid changes, respectively**

47

## 48 **1. Taxon sampling and gene annotation of Cyanobacteria genomes**

49 By the time of this study (Dec 2018), a total of 309 oxygenic cyanobacterial  
50 genomes were available in the NCBI RefSeq database<sup>1</sup>, among which 126 were marked  
51 as high-quality reference or representative genomes (Table S2). For refined  
52 phylogenomic and relaxed molecular clock analyses, the 126 reference or representative  
53 genomes in RefSeq and the *Prochlorococcus* and *Synechococcus* collection included in a  
54 previous study<sup>2</sup> were used here, with the total number of 159 genomes (Table S2). The  
55 latter genomes were included here because they were used to demonstrate an  
56 evolutionary mechanism underlying genome reduction of *Prochlorococcus*<sup>2</sup>, which forms  
57 the basis of the present study. Completeness of all the genomes were assessed using  
58 CheckM v1.0.11<sup>3</sup> (Table S2). Clusters of orthologous group (COG) assignments for  
59 protein sequences were performed using RPSBLAST against the NCBI COG database  
60 (Dec. 2014 release)<sup>4</sup>. Only the top COG hit for each protein was retained, which satisfied  
61 the domain-specific score threshold compiled from NCBI-curated domains and an e-  
62 value cutoff of  $1e^{-3}$ . Additional functional annotations were carried out using the KEGG  
63 database (2017 release) by BLASTP v2.2.6 and subsystem annotations at the RAST  
64 Server platform<sup>5</sup>.

65

## 66 **2. Timing the evolution of *Prochlorococcus***

### 67 *2.1 Relaxed molecular clock method implemented in MCMCTree*

68 The molecular clock hypothesis provides a powerful way to estimate species  
69 divergence time based on molecular sequences<sup>6</sup>. Based on this theory, the genetic  
70 distance of two homologous sequences increases linearly with the length of time since

71 their separation<sup>6</sup>. However, evolutionary rates are often not constant over time and among  
72 lineages, which renders the strict clock hypothesis problematic in deep lineages like the  
73 Cyanobacteria studied here, and only occasionally useful for trees with shallow roots<sup>7,8</sup>.  
74 For this reason, we employed the software MCMCTree<sup>9</sup> to perform relaxed molecular  
75 clock analysis, which is known to be intrinsically associated with the use of  
76 phylogenomic tree, fossil calibrations, clock model and input sequence data. All these  
77 factors have been discussed below.

78

## 79 *2.2 Phylogenomic tree construction of Cyanobacteria*

80 The prerequisite for a reliable estimate of divergence time is to have a resolved  
81 phylogeny<sup>10</sup>. In the case of Cyanobacteria, the mainly unresolved part resides at the LPP  
82 lineage, which contains *Leptolyngbya*, *Plectonema*, *Phormidium*, and *Synechococcus* sp.  
83 PCC7335<sup>11,12</sup>. In published phylogenies, LPP was a monophyletic group either located at  
84 the basal of the Microcyanobacteria group which contains *Synechococcus* and  
85 *Prochlorococcus*<sup>13,14</sup>, or at the basal of the Macrocyano bacteria group which contains the  
86 N<sub>2</sub>-fixing Pleurocapsales and Nostocales<sup>15,16</sup>. We intended to solve this phylogenetic  
87 discrepancy before performing the time estimation.

88

## 89 Ortholog identification among oxygenic Cyanobacteria genomes

90 Using these 159 oxygenic Cyanobacteria genomes, we identified 381 single-copy  
91 orthologous gene families present in at least 155 genomes by implementing the orthology  
92 matrix algorithm (OMA v2.1.1)<sup>17</sup>. We further examined whether all the members of each  
93 family shared the same COG functional category, and screened for potential inter-phylum



94 horizontal gene transfer (HGT) using a BLASTP-based protocol similar to the one used  
95 in a previous study<sup>18</sup>. A potential inter-phylum HGT event was defined as a  
96 cyanobacterial query with a non-cyanobacterial top hit (excluding the query itself; with  
97 an e-value  $\leq 1e-10$  and a percent of identity  $\geq 35\%$ ) from the NCBI nr database<sup>19</sup>. Finally,  
98 a total of 214 (out of 381) single-copy orthologous gene families that met all the  
99 requirements were retained for downstream analyses (Table S4).

100

101 Phylogenomic tree construction of oxygenic Cyanobacteria based on the complete set of  
102 orthologs

103 The orthologous protein sequences were aligned using the E-INS-I refinement  
104 method of MAFFT v7.271<sup>20</sup>, and gaps were removed. The concatenation of the 214  
105 single-copy orthologous gene families resulted in an alignment of 65,818 amino acid  
106 sites. PartitionFinder v2.1.1<sup>21</sup> was used to determine the optimal partitioning schemes and  
107 best-fitting models using a greedy search with Bayesian information criterion (BIC).  
108 Phylogenetic analyses were performed using RAxML v8.2.10 (100 bootstrap replicates  
109 with GAMMA model of rate heterogeneity applied to each partition)<sup>22</sup> (Fig. S4A) and  
110 MrBayes v3.2.6<sup>23</sup> (Fig. S4C). Each Bayesian execution computed two independent runs  
111 with four chains, running for 4,000,000 generations with a burn-in fraction of 25% and a  
112 sampling frequency of 2,000. Convergence between runs and posterior probabilities of  
113 the estimates was determined using Tracer v1.6<sup>24</sup>.

114

115 Phylogenomic tree construction of oxygenic Cyanobacteria based on the compositionally  
116 homogeneous subset of orthologs

117 An evident variation in G+C content among lineages (Table S2) suggested  
118 putative compositional heterogeneity across taxa<sup>25</sup>. To assess whether each orthologous  
119 gene family significantly departs from the assumption of homogeneity, we carried out the  
120 simulation-based test implemented in the P4 phylogenetic toolkit<sup>26</sup>, following a previous  
121 procedure in the analysis of Alphaproteobacteria phylogeny<sup>27</sup>. For each individual  
122 ortholog alignment, we inferred the optimized parameters for the best-fitting substitution  
123 model based on ProtTest analysis<sup>28</sup>, and used the resulting maximum likelihood (ML)  
124 tree as the phylogram on which 1,000 replicates were simulated. The distribution of  
125 amino acid compositions in the simulated data was subsequently compared with that of  
126 the empirical data under the  $\chi^2$  statistic. Eventually, a set of 90 (out of 214) single-copy  
127 orthologous gene families confirmed compositional homogeneity at the 0.05 significance  
128 level (Table S4). Phylogenetic analyses were performed again using these 90 families in  
129 the same way as elucidated above using both ML (Fig. S4B) and Bayesian (Fig. S4D)  
130 approaches, except that the MrBayes runs were ensured with convergence at the  
131 3,000,000<sup>th</sup> generation (instead of 4,000,000<sup>th</sup>) when the average standard deviation of the  
132 split frequency reached as low as 0.002 (< 0.01).

133

134 Phylogenomic tree construction of the Cyanobacteria phylum based on the subset of  
135 orthologs showing compositionally homogeneity

136 To incorporate non-oxygenic Cyanobacteria as outgroups in our molecular clock  
137 analyses, we obtained eight metagenome-assembled genomes (MAGs) of  
138 Melainabacteria and Sericytochromatia from GenBank. All these MAGs are known to be  
139 closely related to oxygenic Cyanobacteria, and have been used as outgroups in a previous

140 study<sup>29</sup>. Completeness of these MAGs were assessed using CheckM v1.0.11<sup>3</sup> (Table S2).  
141 We predicted protein sequences of these MAGs using the software Prokka v1.12<sup>30</sup>, which  
142 were then combined into the protein sequence dataset of oxygenic Cyanobacteria for  
143 another round of ortholog identification using OMA v2.1.1<sup>17</sup>. To simplify the process of  
144 phylogenomic tree construction, we extracted the previously identified set of  
145 compositionally homogeneous orthologs without additional simulation tests. They were  
146 used to build the phylogenomic tree of Cyanobacteria phylum using the software IQ-Tree  
147 v2.0 with automatically assigned amino acid substitution model under 1,000 ultrafast  
148 bootstraps (Fig. S4E).

149

#### 150 Resolved phylogeny of Cyanobacteria

151 Using a concatenation of the protein sequences of the complete set (n=214) of  
152 single-copy orthologous gene families shared by 159 high quality oxygenic  
153 cyanobacterial genomes which contain more LPP members, the LPP lineage forms a  
154 polyphyletic group separately located at the basal of both Microcyanobacteria and  
155 Macrocyanobacteria in the ML (Fig. S4A) and Bayesian trees (Fig. S4C). Interestingly,  
156 using a concatenation of protein sequences of the remaining composition-homogeneous  
157 gene families (n=90), the phylogenies with the ML (Fig. S4B) and Bayesian (Fig. S4D)  
158 methods became fully congruent in which the LPP lineage became a monophyletic group  
159 and located at the basal of the Microcyanobacteria group. This phylogenetic structure has  
160 been commonly used in recent studies of time estimates<sup>12-14</sup>, and remains stable when  
161 non-oxygenic Cyanobacteria outgroups were incorporated (Fig. S4E). We therefore  
162 employed the phylogeny shown in Fig. S4D and S4E for molecular dating analyses.

163

### 164 *2.3 Justification of calibrations used for the molecular dating analyses*

165           Molecular dating analyses are proposed to be intrinsically tied to calibration  
166 points<sup>10</sup>. In the case of Cyanobacteria, there are two major ways to calibrate their  
167 evolution depending on whether the non-oxygenic Cyanobacteria lineages are used or  
168 not. In both ways, three time constraints are commonly used to calibrate the evolution of  
169 Cyanobacteria, which target the origin of oxygenic Cyanobacteria, the origin of  
170 Nostocales, and the origin of Pleurocapsales<sup>12,14,31</sup>. However, when non-oxygenic  
171 Cyanobacteria lineages are included, additional time constraints on the root of  
172 Cyanobacteria phylum are required.

173           Despite the rigorous considerations of Cyanobacteria time constraints in previous  
174 studies, we notice that the way how fossil calibrations were applied in some of those  
175 studies was not appropriate (C1-C6 in Table S1). Thus, we modified the commonly used  
176 calibration sets in the present study (C7-C14 in Table S1) and also proposed a new  
177 strategy to calibrate the evolution of Cyanobacteria when non-oxygenic Cyanobacteria  
178 lineages are included (C15-C38 in Table S1). Details were provided below.

179

#### 180 Calibration of the Nostocales group

181           The time constraints for the crown group of Nostocales have been heavily  
182 debated. The maximum boundary of Nostocales was set at different ages in previous  
183 studies. First, it was inferred based on heterocysts, which are specialized cells for  
184 nitrogen fixation under oxic conditions<sup>32</sup>. As heterocysts were proposed to originate at  
185 the time when the atmospheric oxygen became increasingly available at 2,450 Mya<sup>33,34</sup>,

186 this age was once set as the maximum boundary of Nostocales. Second, it was inferred  
187 based on akinetes, which is another type of differentiated cell of Nostocales for survival  
188 under extreme environmental conditions<sup>34</sup>. Since Nostocales is not the only group in  
189 Cyanobacteria that produce akinetes, the age (2,100 Ma) of the earliest known akinetes  
190 fossil discovered in West Africa was used as the maximum boundary of Nostocales<sup>14,34</sup>.  
191 Third, the Nostocales cells are featured with morphological characters including the  
192 presence of sheath (condensed part of the akinete coat) and large cell diameter<sup>15</sup>. As  
193 ancestral state reconstruction indicates that these characters occurred before the presence  
194 of Nostocales, the maximum age of Nostocales was set to 1,900 Ma when microfossils  
195 with both sheath and large cell diameter first appeared<sup>15,35</sup>. In terms of the minimum  
196 boundary, since the previously mentioned akinete fossil identified at 2,100 Ma was later  
197 inferred to be affiliated with Nostocales, the minimum boundary of Nostocales was set to  
198 2,100 Ma in previous study<sup>34,36</sup>. An alternative minimum age of this lineage was set to  
199 1,600 Ma due to the discovery of the nostocalean akinetes fossil in McArthur Group,  
200 northern Australia<sup>37</sup>. We noticed that the akinete fossil identified to 2,100 Ma was used as  
201 either the maximum boundary or the minimum boundary of Nostocales in different  
202 Cyanobacteria dating analyses<sup>12,14</sup>. Although being self-contradictory, we still employed  
203 this boundary in different calibration sets (Table S1) for the purpose of comparison.

204 We note that morphological fossils such as akinetes and heterocysts have been  
205 used as the maximum bound to calibrate the crown group of Nostocales in previous  
206 studies<sup>14,31</sup>. However, given the potentially large gap between the initial appearance of an  
207 apomorphic character and its first fossilization time<sup>38</sup>, the placement of these fossils on  
208 crown group of Nostocales may overly constrain the age prior and lead to false precisions

209 in time estimates. Given the fact that apomorphic characters must have evolved earlier  
210 than the divergence of the crown group of assigned lineage, a more secure way to use  
211 these morphological fossils is to constrain the minimum age on total groups<sup>38</sup>. From this  
212 perspective, the use of the nostocalean akinete fossils as the minimum constraints in  
213 previous studies are also inappropriate, as they were placed on the crown group of  
214 Nostocales<sup>12,31</sup>. Given these considerations, in the present study, we employed these  
215 morphological fossils to calibrate the lower bounds of the Nostocales total group  
216 regardless of whether the non-oxygenic Cyanobacteria lineages were used or not, and left  
217 the upper limit of Nostocales group open to avoid overly precise age estimates (C9-C38  
218 in Table S1).

219

#### 220 Calibration of the Pleurocapsales group

221 The time constraints for the crown group of Pleurocapsales are also contentious.  
222 Members of Pleurocapsales have large cell diameters<sup>15</sup>. Since this character has been  
223 proposed to evolve earlier than the ancestor of Pleurocapsales, the maximum age of  
224 Pleurocapsales was once set to 2,450 Ma when the large cell diameter appeared in  
225 microfossil<sup>15</sup>. Alternatively, since Pleurocapsales evolved later than filamentous and  
226 coccoid Cyanobacteria<sup>14</sup>, which were proposed to occur at 1,900 Ma based on the  
227 microfossil identified in Gunflint chert<sup>39</sup>, the maximum boundary of Pleurocapsales was  
228 set to 1,900 Ma in previous Cyanobacteria dating analyses<sup>14,31</sup>. The minimum age of  
229 Pleurocapsales was set to 1,700 Ma because of the microfossil identified in Hebei,  
230 China<sup>40,41</sup>.

231 We argue that the use of morphological fossils such as filamentous and coccoid  
232 cells as the maximum bound of Pleurocapsales in previous studies was not appropriate  
233 for the same reason we provided in the last section ‘Calibration of the Nostocales group’.  
234 Thus, we modified the use of microfossils at 1,900 Ma as the minimum bound of total  
235 Pleurocapsales group. Moreover, since the maximum bound is hard to be established  
236 using fossil records<sup>38</sup>, we left the upper limit of Pleurocapsales group open (C9-C38 in  
237 Table S1).

238

### 239 Calibrations of the root of oxygenic Cyanobacteria

240 For the root of oxygenic Cyanobacteria (i.e., the root of the phylogenomic tree  
241 when non-oxygenic Cyanobacteria lineages are not included; Fig. S4D), the minimum  
242 age at 2,320 Mya is commonly applied because of the convincing geochemical evidence  
243 for the rise of atmospheric oxygen at that time known as the Great Oxidation Event  
244 (GOE)<sup>42</sup>, though recent studies showed that GOE may antedate the crown group of  
245 oxygenic Cyanobacteria<sup>43,44</sup>. The upper limit calibration of this root has been even more  
246 contentious. It was initially reported that 2-methylhopane can be used as a biomarker for  
247 Cyanobacteria<sup>45</sup>, and the oldest record of this biomarker is dated back to 2,700 Mya<sup>46</sup>, but  
248 the taxonomic link of 2-methylhopane to Cyanobacteria was challenged by the  
249 discoveries that 2-methylhopane is produced by the anoxygenic phototroph  
250 *Rhodospseudomonas palustris* under anaerobic conditions<sup>47</sup>, and that the key gene for the  
251 methylation at the C-2 position of hopanoids was also found in  $\alpha$ -Proteobacteria and  
252 Acidobacteria<sup>48</sup>. The use of 2,700 Mya as the maximum age of the emergence of  
253 oxygenic Cyanobacteria was further weakened by a recent finding that the previously

254 studied samples contained contaminants<sup>49</sup>. On the other hand, ample geochemical  
255 evidence based on various sensitive redox proxies indicates the appreciable levels of the  
256 atmospheric oxygen at 3,000 Mya<sup>50-52</sup>, which has been used as the upper bound of crown  
257 oxygenic Cyanobacteria in recent molecular clock analyses<sup>14,31</sup>. Consequently, in the  
258 cases when non-oxygenic Cyanobacteria lineages were not included, we calibrated the  
259 lower and upper limit of the crown oxygenic Cyanobacteria at 2,320 Mya and 3,000 Mya,  
260 respectively (C9-C14 in Table S1; Fig. S4D).

261         Recently, two lineages have been identified as the outgroups of oxygenic  
262 Cyanobacteria: Melainabacteria and Sericytochromatia<sup>29,53</sup>. Members of these outgroup  
263 lineages are proposed to lack essential genes for photosynthesis and carbon fixation,  
264 suggesting that the last common ancestor of Cyanobacteria was non-phototrophic<sup>29</sup>. If  
265 this is the case, the oxygenic photosynthesis could be an evolutionary synapomorphy,  
266 which likely evolved at the stem lineage of oxygenic Cyanobacteria. Thus, when non-  
267 oxygenic Cyanobacteria lineages are incorporated, it is more appropriate to constrain the  
268 lower bound of total oxygenic Cyanobacteria instead of the upper bound of crown  
269 oxygenic Cyanobacteria using the geochemical evidence that atmospheric oxygen  
270 became available at 3,000 Mya<sup>50-52</sup> (C15-C38 in Table S1; Fig. S4E).

271

#### 272 Calibrations of the root of Cyanobacteria phylum

273         In the cases when non-oxygenic Cyanobacteria lineages were included, we have  
274 to calibrate the root of phylogeny (i.e., the root of the Cyanobacteria phylum; Fig. S4E).  
275 To avoid overly precise age estimates, we constrained the upper limit of the  
276 Cyanobacteria root as ancient as possible. Given the potentially great influence of root



277 prior on time estimates<sup>54</sup>, we attempted different maximum prior ages for comparison.  
278 For example, we used 4,200 Mya, 4,000 Mya and 3,800 Mya by considering the time  
279 when the planet Earth became habitable and fostered the earliest life<sup>55,56</sup> (C15-C32; Table  
280 S1). Additionally, a more conservative age at 4,500 Mya was used, since it was the time  
281 when the planet Earth formed<sup>55</sup> (C33-C38; Table S1).

282

#### 283 *2.4 Selection of molecular clock model*

284 Molecular clock model is known to have a strong impact on posterior age  
285 estimates<sup>57</sup>. The software MCMCTree implements different relaxed molecular clock  
286 models for time estimation, including auto-correlated rates (AR) model and independent  
287 rates (IR) model. The former assumes that the evolutionary rates in daughter species are  
288 statistically distributed around the parental rates, whereas the latter assumes a fully  
289 independent rate among evolutionary branches<sup>58</sup>.

290 To assess the fitness of each clock model in our data, we compared the Bayes  
291 factors (BF) of these models using the thermodynamic integration method in the package  
292 “mcmc3r”<sup>58</sup>. While the method is powerful, it is very computationally intensive. Thus,  
293 we used the calibration set C9 as the representative for Bayesian model selection. Our  
294 results indicate that the IR model is superior to the AR model, as the BF value of the  
295 former is much higher than that of the latter (0.999 vs 0.001). We therefore employed the  
296 IR model in the following molecular clock analyses.

297

#### 298 *2.5 Input sequence data for molecular clock analysis*

299 As an enlarged sequence dataset is able to improve the precision of time  
300 estimation based on the infinite-site theory<sup>59</sup>, we employed as many as 25 core protein-  
301 coding genes<sup>60</sup> and two rRNA genes (16S, 23S) in the present study. Since substitutions  
302 at the third codon positions are largely silent and thus reach saturation rapidly, only the  
303 first and second codon positions of the 25 protein-coding genes were used. These 25  
304 conserved protein-coding genes were previously identified from a genomic dataset  
305 spanning multiple bacterial and archaeal phyla and used to infer the evolutionary timeline  
306 of those groups<sup>60</sup>. For each gene, we selected the best-fitting nucleotide substitution  
307 model by jModelTest<sup>61</sup>, and calculated a rough substitution rate using BASEML<sup>9</sup> under a  
308 strict molecular clock. Further, the mean substitution rate was calculated based on the  
309 substitution rates of all input gene sequences, and then was used to inform the Dirichlet-  
310 gamma prior (rgene\_gamma) in MCMCTree.

311

## 312 *2.6 Assessing the precisions of molecular clock analyses*

313 Evaluation of molecular clock analyses is important, since using different  
314 calibration set leads to a difference up to over 320 Ma in the estimates of the SBE-LCA  
315 when the non-oxygenic Cyanobacteria were not included (i.e., the last common ancestor  
316 of *Prochlorococcus* HL, LLI and LLII/III) (655 Mya under calibration set C6 vs. 981  
317 Mya under calibration set C3; Fig. S2). Although the variation reduces to less than 10 Ma  
318 when the ages were estimated with the modified calibration sets (C7-C14 in Table S1),  
319 statistical evaluations of these analyses are valuable. The Bayesian inference approach  
320 that implemented in MCMCTree integrates the information from both calibrations and  
321 genetic data for posterior age estimation<sup>62</sup>. Once the use of a calibration set is settled,

322 according to the infinite-site theory, increased number of sites are recommended for  
323 molecular clock analysis, as they reduce the uncertainty in genetic distance estimate and  
324 increase the precision of the posterior time estimates<sup>59</sup>. Theoretically, if sequences of  
325 infinite sites are used, the uncertainties in posterior time estimates are solely imposed by  
326 the uncertainties of the calibrations<sup>59</sup>. By plotting the widths of 95% HPD interval against  
327 the posterior mean ages, we are able to assess the precision of the molecular clock  
328 analyses by comparing the slopes of the regression lines. A greater slope represents a  
329 lower precision of the time estimates<sup>62,63</sup>.

330         It has been repeatedly proposed that using multiple and more calibrations often  
331 lead to more reliable estimation than using less or even a single calibration<sup>59,64</sup>.  
332 Consistently, we showed that the time estimates based on calibration set C7 and C8 with  
333 a single calibration node has a high slope of 0.19 and 0.29, respectively (Fig. S3). It  
334 means that every 100 Ma divergence adds 19 and 29 Ma uncertainty in the posterior time  
335 estimates, respectively. According to this rule, the time estimates based on calibration set  
336 C14 has the lowest slope (0.149; Fig. S3), suggesting that the posterior time estimates of  
337 the SBE-LCA derived from this set are most precise. We did not further consider the  
338 analyses based on the calibration sets C1-C6 because the calibrations were not  
339 appropriately placed on the phylogeny.

340         We note that including Melainabacteria and Sericytochromatia consistently lead  
341 to less precise age estimates, as shown by higher slopes of the regression line between  
342 HPD width and the posterior age estimates (C15-C38 versus C1-C14 in Fig. S3). Given  
343 that genomes of these non-oxygenic Cyanobacteria lineages are fully represented by  
344 metagenome-assembled genomes (MAGs) but genomes of oxygenic Cyanobacteria used

345 in our analyses are all derived from pure cultures, we hypothesize that the use of MAGs  
346 in molecular dating analysis, particularly those of lineages occupying important  
347 phylogenetic positions, may increase the uncertainties of the posterior age estimates. The  
348 quality of MAGs is questionable. While the CheckM<sup>3</sup> predicted that all of the MAGs  
349 used here show high level of completeness and low level of contamination (Table S2),  
350 these assessments may not be reliable, as shown in a recent benchmarking study<sup>65</sup>. For  
351 example, MAGs with estimated completeness as high as 95% may capture only three-  
352 fourths of the population core genes and a half of the variable genes, suggesting a greater  
353 amount of DNA is missing in the assemblies than estimated<sup>65</sup>. Moreover, MAGs with  
354 estimated contamination as low as 1.5% may incorporate up to 5% of their genes with  
355 other taxonomic origins, suggesting a potentially higher contamination rate in the  
356 MAGs<sup>65</sup>.

357

### 358 **3. Reconstruction of gene gain and loss processes**

#### 359 *3.1 Using AnGST*

360 Genome content evolution via gene gains and losses was inferred using the gene  
361 tree vs. species tree reconciliation approach implemented in AnGST<sup>66</sup>. The 62 genomes  
362 comprising the *Synechococcus-Prochlorococcus* monophyletic group were retrieved from  
363 the ultrametric cladograms yielded by the molecular dating analyses as described above  
364 (Fig. S11). Gene trees were constructed using the following procedure. Firstly, homology  
365 relationships among proteins of the 62 *Synechococcus* and *Prochlorococcus* genomes  
366 were determined using OrthoFinder v2.2.1<sup>67</sup> with DIAMOND as the alignment  
367 program<sup>68</sup>. We identified 4,689 orthogroups (out of 5,615 orthogroups in total) each with

368 at least three sequences. Next, multi-sequence alignments were constructed for each  
369 orthogroup using E-INS-I method implemented in the software MAFFT v7.222<sup>20</sup>, and  
370 trimmed with trimAl v1.4 ('-gappyout' option) to remove poorly aligned and excessively  
371 gapped regions<sup>69</sup>. Lastly, gene trees were built using IQ-TREE v1.6.2<sup>70</sup> under the  
372 ModelFinder feature (-m MFP) with ultrafast bootstrapping (1,000 replicates).

373 The reconciliation was inferred for each orthogroup under a generalized  
374 parsimony framework to achieve a minimum number of evolutionary events (gene loss,  
375 gene duplication, horizontal gene transfer [HGT], gene birth and speciation) along the  
376 species tree, using event penalties determined by the genome flux analysis<sup>66</sup>. The genome  
377 flux analysis requires a minimal average difference in genome size between the ancestor  
378 and the descendant across the branches of the species tree, resulting in a set of optimized  
379 event penalties. We implemented the genome flux analysis with the speciation penalty  
380 fixed at 0.0 and the loss penalty at 1.0 as recommended in a previous study<sup>66</sup>. The  
381 minimal genome flux was achieved when the HGT and duplication penalties are equal to  
382 3.0 and 4.0, respectively (Fig. S8). The HGT penalty inferred here agreed with the value  
383 achieved in a previous study based on a wide range of taxa across all three domains<sup>66</sup>,  
384 and also confirmed HGT as the strongest effect on the genome flux as suggested in  
385 previous studies<sup>66,71,72</sup>.

386 For all reconciliations performed, we enforced the time consistency (ultrametric =  
387 True) and restricted transfers to occur only between contemporaneous lineages. All 1,000  
388 bootstrap replicates of each gene tree were provided to AnGST to resolve the gene tree  
389 phylogenetic uncertainties through amalgamation<sup>66</sup>. AnGST incorporates the gene tree  
390 refinement procedure into the reconciliation process, and yields a chimeric gene tree

391 (from the bootstrap replicates) which results in the lowest reconciliation cost, satisfying a  
392 generalized parsimony criterion<sup>66</sup>. The numbers of gain, loss, and transfer events were  
393 summarized based on the AnGST output for each orthogroup across all branches along  
394 the species tree.

395

### 396 *3.2 Using BadiRate*

397 Gene gains and losses were also inferred with the likelihood-based method  
398 equipped in BadiRate v1.35<sup>73</sup>, which uses a full ML approach to determine the gene  
399 family turnover rates that maximize the probability of observing the gene count patterns  
400 provided in the family size table. A table of gene counts, consisting of all the  
401 aforementioned 5,615 orthogroups inferred by OrthoFinder v2.2.1<sup>67</sup>, and the same  
402 ultrametric time tree used in the AnGST analysis were used as the inputs. We fit nine  
403 different combinations of turnover rates (e.g., Birth-Death-Innovation model [BDI],  
404 Gain-Death model [GD], Lambda model [L] and Lambda-Innovation model [LI]) and  
405 branch models (e.g., Global-Rates model [GR], Branch-Specific-Rates model [BR], or  
406 Free-Rates model [FR]), including BDI/GD/L/LI+GR+ML, BDI/GD/L/LI+BR+ML and  
407 GD+FR+ML. Due to the computational intensity of the FR branch model, it was only  
408 implemented with the GD model under the ML framework. In the BR model, the four  
409 branches leading to the last common ancestor (LCA) of all *Prochlorococcus*, of the HL,  
410 LLI and LLII/III clades, of the HL and LLI clades, and of the HL clade, were allowed to  
411 have branch-specific turnover rates, whereas other branches were assumed to share the  
412 same rate. To avoid local optima, we ran 100 replicates for each ML analysis using  
413 different starting values (-start\_val 1 accompanied with distinct seeds [-seed] provided by

414 a random number generator). The likelihood of different runs among distinct models  
415 were compared (Fig. S9). The presented estimates were based on the run with the  
416 maximum likelihood in each selected model.

417

### 418 *3.3 Gene gain and loss data integration*

419 For both methods, the corresponding results were compared and summarized to  
420 determine the common patterns shared by all analyses. AnGST categorizes the variation  
421 of genome contents into born, loss, duplication and horizontal gene transfer, whereas  
422 BadiRate only reports gene gain and loss through copy number changes. To smooth the  
423 comparison of all attempts, we standardized a “gain” event as the increase in the copy  
424 number of a gene family (including born, duplication and HGT), and accordingly a “loss”  
425 event as the decrease in the copy number of a gene family (including complete and partial  
426 loss) (Fig. S12). Since the two methods gave a similar pattern of genome size reduction,  
427 we presented the number of gene gains and losses derived from the AnGST in the main  
428 text.

429

## 430 **4. Calculating the rate of nonsynonymous nucleotide substitutions leading to radical** 431 **and conservative amino acid changes, respectively**

432 Previous study identified an excess of radical changes in *Prochlorococcus* HL and  
433 LLI/II/III lineages in comparison to their LLIV relatives<sup>2</sup>. Here, radical changes are  
434 defined as nonsynonymous nucleotide substitutions leading to the replacements between  
435 amino acids with distinct physicochemical properties (charge, volume and polarity; Table  
436 S5), while conservative changes are among similar amino acids. The Radical and

437 Conservative change Calculator (RCCalculator <http://www.geneorder.org/RCCalculator/>)  
438 was developed to compute the radical and conservative substitution rates ( $d_R$  and  $d_C$ )  
439 which takes into account the GC biases of the DNA sequences<sup>2</sup>.

440 In the present study, a total of 543 single-copy orthologous gene families, shared  
441 by all the 61 genomes of *Prochlorococcus* and *Synechococcus* clade 5.1/5.2, were  
442 retrieved from the aforementioned results of OrthoFinder v2.2.1<sup>67</sup>. Genes were aligned at  
443 the amino acid level using MAFFT v7.271<sup>20</sup>, and DNA sequences were imposed on the  
444 alignments. Gaps and codons with ambiguous nucleotides were removed. The ratio of  
445 nonsynonymous to synonymous substitution rates ( $d_N/d_S$ ) was calculated using  
446 KaKs\_Calculator under YN model for each of the orthologous gene pairs<sup>74</sup>, and the  
447 median value of each gene family was used for RCCalculator. The transition/transversion  
448 ratio ( $t_S/t_V$ ) of each gene family, also required by RCCalculator, was estimated using  
449 MEGA-CC v7.0.26<sup>75</sup>. By incorporating the uncultivated lineages of *Prochlorococcus*, a  
450 total of 751 single-copy orthologous gene families shared by 62 out of 65 genomes were  
451 retrieved and subject to the same procedures as described.

452 A total of six cases were considered for the calculation of  $d_R$  and  $d_C$ , including  
453 two ways of categorizing amino acids (by charge and by volume and polarity) and three  
454 approaches of GC-bias correction (uncorrected, on codon frequency correction, and on  
455 amino acid composition correction). Under each case, given a gene family, RCCalculator  
456 estimates the number of radical and conservative sites for each sequence ( $R_i$  and  $C_i$ ,  
457 where  $i \in [1, 61]$ ), as well as the numbers of radical and conservative differences of each  
458 sequence pair ( $\Delta R_{ij}$  and  $\Delta C_{ij}$ , where  $i \in [1, 61]$ ,  $j \in [1, 61]$ , and  $i \neq j$ ). Then, the

459 pairwise  $d_R/d_C$  ratio was defined as  $\left[ \frac{\Delta R_{ij}}{\text{mean}(R_i, R_j)} \right] / \left[ \frac{\Delta C_{ij}}{\text{mean}(C_i, C_j)} \right]$ , where  $i \in [1, 61]$ ,  $j \in$



460 [1, 61], and  $i \neq j$ . In our study, each gene family had approximately 240  $d_R/d_C$  ratios  
461 resulted from the comparisons between sequences of the target group and the reference  
462 group (40 genomes in the target group vs. six genomes in the reference group), and 90  
463  $d_R/d_C$  ratios from the control vs. reference comparisons (15 genomes in the control group  
464 vs. six reference ones). The mean values of these two categories were then used to  
465 represent the “target” and “control”  $d_R/d_C$  ratios of the gene family. Further, after pooling  
466 all the 543 pairs of  $d_R/d_C$  ratios together, sign test and paired t-test were used to determine  
467 significant differences between the  $d_R/d_C$  ratios from the “target” and “control” groups.  
468

- 470 1 Pruitt, K. D., Tatusova, T. & Maglott, D. R. NCBI reference sequences (RefSeq): a curated  
471 non-redundant sequence database of genomes, transcripts and proteins. *Nucleic Acids Res*  
472 **35**, D61-65 (2007).
- 473 2 Luo, H., Huang, Y., Stepanauskas, R. & Tang, J. Excess of non-conservative amino acid  
474 changes in marine bacterioplankton lineages with reduced genomes. *Nat Microbiol* **2**,  
475 17091 (2017).
- 476 3 Parks, D. H., Imelfort, M., Skennerton, C. T., Hugenholtz, P. & Tyson, G. W. CheckM:  
477 assessing the quality of microbial genomes recovered from isolates, single cells, and  
478 metagenomes. *Genome Res* **25**, 1043-1055 (2015).
- 479 4 Tatusov, R. L., Galperin, M. Y., Natale, D. A. & Koonin, E. V. The COG database: a tool  
480 for genome-scale analysis of protein functions and evolution. *Nucleic Acids Res* **28**, 33-36  
481 (2000).
- 482 5 Aziz, R. K. *et al.* The RAST server: Rapid annotations using subsystems technology. *Bmc*  
483 *Genomics* **9** (2008).
- 484 6 Zuckerkandl, E. P., Linus. Evolutionary divergence and convergence in proteins. In  
485 *Evolving genes and proteins* 97-166 (Elsevier, 1965).
- 486 7 Kumar, S. Molecular clocks: four decades of evolution. *Nature Reviews Genetics* **6**, 654  
487 (2005).
- 488 8 Brown, R. P. & Yang, Z. Rate variation and estimation of divergence times using strict and  
489 relaxed clocks. *BMC Evol Biol* **11**, 271 (2011).
- 490 9 Yang, Z. PAML 4: phylogenetic analysis by maximum likelihood. *Mol Biol Evol* **24**, 1586-  
491 1591 (2007).
- 492 10 Schirrmeyer, B. E., Sanchez-Baracaldo, P. & Wacey, D. Cyanobacterial evolution during  
493 the Precambrian. *Int J Astrobiol* **15**, 187-204 (2016).
- 494 11 Sarma T A. Handbook of cyanobacteria. (CRC Press, 2012).
- 495 12 Sánchez-Baracaldo, P., Ridgwell, A. & Raven, J. A. A neoproterozoic transition in the  
496 marine nitrogen cycle. *Current Biology* **24**, 652-657 (2014).
- 497 13 Shih, P. M. *et al.* Improving the coverage of the cyanobacterial phylum using diversity-  
498 driven genome sequencing. *Proc Natl Acad Sci USA* **110**, 1053-1058 (2013).
- 499 14 Sánchez-Baracaldo, P. Origin of marine planktonic cyanobacteria. *Sci Rep* **5**, 17418 (2015).
- 500 15 Blank, C. & Sanchez-Baracaldo, P. Timing of morphological and ecological innovations in  
501 the cyanobacteria—a key to understanding the rise in atmospheric oxygen. *Geobiology* **8**, 1-  
502 23 (2010).
- 503 16 Uyeda, J. C., Harmon, L. J. & Blank, C. E. A comprehensive study of cyanobacterial  
504 morphological and ecological evolutionary dynamics through deep geologic time. *PLoS*  
505 *One* **11**, e0162539 (2016).
- 506 17 Train, C. M., Glover, N. M., Gonnet, G. H., Altenhoff, A. M. & Dessimoz, C. Orthologous  
507 Matrix (OMA) algorithm 2.0: more robust to asymmetric evolutionary rates and more  
508 scalable hierarchical orthologous group inference. *Bioinformatics* **33**, i75-i82 (2017).
- 509 18 Williams, T. A. *et al.* Integrative modeling of gene and genome evolution roots the archaeal  
510 tree of life. *Proc Natl Acad Sci USA* **114**, E4602-E4611 (2017).
- 511 19 Coordinators, N. R. Database resources of the National Center for Biotechnology  
512 Information. *Nucleic Acids Res* **46**, D8-D13 (2018).
- 513 20 Katoh, K. & Standley, D. M. MAFFT multiple sequence alignment software version 7:  
514 improvements in performance and usability. *Mol Biol Evol* **30**, 772-780 (2013).
- 515 21 Lanfear, R., Frandsen, P. B., Wright, A. M., Senfeld, T. & Calcott, B. PartitionFinder 2:  
516 New Methods for Selecting Partitioned Models of Evolution for Molecular and  
517 Morphological Phylogenetic Analyses. *Mol Biol Evol* **34**, 772-773 (2017).
- 518 22 Stamatakis, A. RAxML version 8: a tool for phylogenetic analysis and post-analysis of

519 large phylogenies. *Bioinformatics* **30**, 1312-1313 (2014).

520 23 Ronquist, F. *et al.* MrBayes 3.2: efficient Bayesian phylogenetic inference and model  
521 choice across a large model space. *Syst Biol* **61**, 539-542 (2012).

522 24 Drummond, A. J., Rambaut, A., Shapiro, B. & Pybus, O. G. Bayesian coalescent inference  
523 of past population dynamics from molecular sequences. *Mol Biol Evol* **22**, 1185-1192  
524 (2005).

525 25 Foster, P. G. & Hickey, D. A. Compositional bias may affect both DNA-based and protein-  
526 based phylogenetic reconstructions. *J Mol Evol* **48**, 284-290 (1999).

527 26 Foster, P. G. Modeling compositional heterogeneity. *Syst Biol* **53**, 485-495 (2004).

528 27 Luo, H. Evolutionary origin of a streamlined marine bacterioplankton lineage. *ISME J* **9**,  
529 1423 (2015).

530 28 Darriba, D., Taboada, G. L., Doallo, R. & Posada, D. ProtTest 3: fast selection of best-fit  
531 models of protein evolution. *Bioinformatics* **27**, 1164-1165 (2011).

532 29 Soo, R. M., Hemp, J., Parks, D. H., Fischer, W. W. & Hugenholtz, P. On the origins of  
533 oxygenic photosynthesis and aerobic respiration in Cyanobacteria. *Science* **355**, 1436-1440  
534 (2017).

535 30 Seemann, T. Prokka: rapid prokaryotic genome annotation. *Bioinformatics* **30**, 2068-2069  
536 (2014).

537 31 Sánchez-Baracaldo, P., Raven, J. A., Pisani, D. & Knoll, A. H. Early photosynthetic  
538 eukaryotes inhabited low-salinity habitats. *Proc Natl Acad Sci USA*, 201620089 (2017).

539 32 Wolk, C. P., Ernst, A. & Elhai, J. in *The molecular biology of cyanobacteria* 769-823  
540 (Springer, 1994).

541 33 Farquhar, J., Bao, H. & Thieme, M. Atmospheric influence of Earth's earliest sulfur cycle.  
542 *Science* **289**, 756-758 (2000).

543 34 Tomitani, A., Knoll, A. H., Cavanaugh, C. M. & Ohno, T. The evolutionary diversification  
544 of cyanobacteria: molecular-phylogenetic and paleontological perspectives. *Proc Natl  
545 Acad Sci USA* **103**, 5442-5447 (2006).

546 35 Schirmer, B. E., Gugger, M. & Donoghue, P. C. Cyanobacteria and the Great Oxidation  
547 Event: evidence from genes and fossils. *Palaeontology* **58**, 769-785 (2015).

548 36 Knoll, A., Golubic, S., Green, J. & Swett, K. Organically preserved microbial endoliths  
549 from the late Proterozoic of East Greenland. *Nature* **321**, 856 (1986).

550 37 Golubic, S., Sergeev, V. N. & Knoll, A. H. Mesoproterozoic Archaeoellipsoides: akinetes  
551 of heterocystous cyanobacteria. *Lethaia* **28**, 285-298 (1995).

552 38 Marshall, C. R. Using the Fossil Record to Evaluate Timetree Timescales. *Front Genet* **10**,  
553 1049 (2019).

554 39 Sergeev, V., Gerasimenko, L. & Zavarzin, G. The proterozoic history and present state of  
555 cyanobacteria. *Microbiology* **71**, 623-637 (2002).

556 40 Zhang, Y. & Golubic, S. Endolithic microfossils (cyanophyta) from early Proterozoic  
557 stromatolites, Hebei, China. *Acta Micropaleontol. Sin* **4**, 1-3 (1987).

558 41 Golubic, S. & Seong-Joo, L. Early cyanobacterial fossil record: preservation,  
559 palaeoenvironments and identification. *Eur J Phycol* **34**, 339-348 (1999).

560 42 Bekker, A. *et al.* Dating the rise of atmospheric oxygen. *Nature* **427**, 117 (2004).

561 43 Shih, P. M., Hemp, J., Ward, L. M., Matzke, N. J. & Fischer, W. W. Crown group  
562 Oxyphotobacteria postdate the rise of oxygen. *Geobiology* **15**, 19-29 (2017).

563 44 Betts, H. C. *et al.* Integrated genomic and fossil evidence illuminates life's early evolution  
564 and eukaryote origin. *Nat Ecol Evol* **2**, 1556-1562 (2018).

565 45 Summons, R. E., Jahnke, L. L., Hope, J. M. & Logan, G. A. 2-Methylhopanoids as  
566 biomarkers for cyanobacterial oxygenic photosynthesis. *Nature* **400**, 554 (1999).

567 46 Brocks, J. J., Buick, R., Summons, R. E. & Logan, G. A. A reconstruction of Archean  
568 biological diversity based on molecular fossils from the 2.78 to 2.45 billion-year-old Mount  
569 Bruce Supergroup, Hamersley Basin, Western Australia. *Geochim Cosmochim Acta* **67**,

570 4321-4335 (2003).

571 47 Rashby, S. E., Sessions, A. L., Summons, R. E. & Newman, D. K. Biosynthesis of 2-  
572 methylbacteriohopanepolyols by an anoxygenic phototroph. *Proc Natl Acad Sci USA* **104**,  
573 15099-15104 (2007).

574 48 Welander, P. V., Coleman, M. L., Sessions, A. L., Summons, R. E. & Newman, D. K.  
575 Identification of a methylase required for 2-methylhopanoid production and implications  
576 for the interpretation of sedimentary hopanes. *Proc Natl Acad Sci USA* **107**, 8537-8542  
577 (2010).

578 49 French, K. L. *et al.* Reappraisal of hydrocarbon biomarkers in Archean rocks. *Proc Natl*  
579 *Acad Sci USA* **112**, 5915-5920 (2015).

580 50 Crowe, S. A. *et al.* Atmospheric oxygenation three billion years ago. *Nature* **501**, 535  
581 (2013).

582 51 Lalonde, S. V. & Konhauser, K. O. Benthic perspective on Earth's oldest evidence for  
583 oxygenic photosynthesis. *Proc Natl Acad Sci USA* **112**, 995-1000 (2015).

584 52 Planavsky, N. J. *et al.* Evidence for oxygenic photosynthesis half a billion years before the  
585 Great Oxidation Event. *Nat Geosci* **7**, 283 (2014).

586 53 Di Rienzi, S. C. *et al.* The human gut and groundwater harbor non-photosynthetic bacteria  
587 belonging to a new candidate phylum sibling to Cyanobacteria. *Elife* **2**, e01102 (2013).

588 54 Battistuzzi, F. U., Billing-Ross, P., Murillo, O., Filipowski, A. & Kumar, S. A Protocol for  
589 Diagnosing the Effect of Calibration Priors on Posterior Time Estimates: A Case Study for  
590 the Cambrian Explosion of Animal Phyla. *Mol Biol Evol* **32**, 1907-1912 (2015).

591 55 Nisbet, E. G. & Sleep, N. H. The habitat and nature of early life. *Nature* **409**, 1083-1091  
592 (2001).

593 56 Sleep, N. H., Zahnle, K. J., Kasting, J. F. & Morowitz, H. J. Annihilation of ecosystems by  
594 large asteroid impacts on the early Earth. *Nature* **342**, 139-142 (1989).

595 57 Dos Reis, M. *et al.* Uncertainty in the timing of origin of animals and the limits of precision  
596 in molecular timescales. *Current Biology* **25**, 2939-2950 (2015).

597 58 Reis, M. D. *et al.* Using phylogenomic data to explore the effects of relaxed clocks and  
598 calibration strategies on divergence time estimation: primates as a test case. *Syst Biol* **67**,  
599 594-615 (2018).

600 59 Yang, Z. & Rannala, B. Bayesian estimation of species divergence times under a molecular  
601 clock using multiple fossil calibrations with soft bounds. *Mol Biol Evol* **23**, 212-226 (2005).

602 60 Battistuzzi, F. U. & Hedges, S. B. A major clade of prokaryotes with ancient adaptations to  
603 life on land. *Mol Biol Evol* **26**, 335-343 (2008).

604 61 Darriba, D., Taboada, G. L., Doallo, R. & Posada, D. jModelTest 2: more models, new  
605 heuristics and parallel computing. *Nat Methods* **9**, 772 (2012).

606 62 Inoue, J., Donoghue, P. C. & Yang, Z. The impact of the representation of fossil calibrations  
607 on Bayesian estimation of species divergence times. *Syst Biol* **59**, 74-89 (2009).

608 63 Dos Reis, M. & Yang, Z. The unbearable uncertainty of Bayesian divergence time  
609 estimation. *J Syst Evol* **51**, 30-43 (2013).

610 64 Sauquet, H. *et al.* Testing the impact of calibration on molecular divergence times using a  
611 fossil-rich group: the case of Nothofagus (Fagales). *Syst Biol* **61**, 289-313 (2011).

612 65 Meziti, A. *et al.* How reliably do metagenome-assembled genomes (MAGs) represent  
613 natural populations? Insights from comparing MAGs against isolate genomes derived from  
614 the same fecal sample. *Appl Environ Microbiol* (2021).

615 66 David, L. A. & Alm, E. J. Rapid evolutionary innovation during an Archaean genetic  
616 expansion. *Nature* **469**, 93 (2010).

617 67 Emms, D. M. & Kelly, S. OrthoFinder: solving fundamental biases in whole genome  
618 comparisons dramatically improves orthogroup inference accuracy. *Genome Biol* **16**, 157  
619 (2015).

620 68 Buchfink, B., Xie, C. & Huson, D. H. Fast and sensitive protein alignment using

621 DIAMOND. *Nature Methods* **12**, 59-60 (2015).  
622 69 Capella-Gutierrez, S., Silla-Martinez, J. M. & Gabaldon, T. trimAl: a tool for automated  
623 alignment trimming in large-scale phylogenetic analyses. *Bioinformatics* **25**, 1972-1973  
624 (2009).  
625 70 Nguyen, L. T., Schmidt, H. A., von Haeseler, A. & Minh, B. Q. IQ-TREE: a fast and  
626 effective stochastic algorithm for estimating maximum-likelihood phylogenies. *Mol Biol*  
627 *Evol* **32**, 268-274 (2015).  
628 71 Kamneva, O. K., Knight, S. J., Liberles, D. A. & Ward, N. L. Analysis of genome content  
629 evolution in pvc bacterial super-phylum: assessment of candidate genes associated with  
630 cellular organization and lifestyle. *Genome Biol Evol* **4**, 1375-1390 (2012).  
631 72 Richards, V. P. *et al.* Phylogenomics and the dynamic genome evolution of the genus  
632 *Streptococcus*. *Genome Biol Evol* **6**, 741-753 (2014).  
633 73 Librado, P., Vieira, F. G. & Rozas, J. BadiRate: estimating family turnover rates by  
634 likelihood-based methods. *Bioinformatics* **28**, 279-281 (2012).  
635 74 Wang, D., Zhang, Y., Zhang, Z., Zhu, J. & Yu, J. KaKs\_Calculator 2.0: a toolkit  
636 incorporating gamma-series methods and sliding window strategies. *Genomics, proteomics*  
637 *& bioinformatics* **8**, 77-80 (2010).  
638 75 Kumar, S., Stecher, G., Peterson, D. & Tamura, K. MEGA-CC: computing core of  
639 molecular evolutionary genetics analysis program for automated and iterative data analysis.  
640 *Bioinformatics* **28**, 2685-2686 (2012).  
641

**Fig. S1**

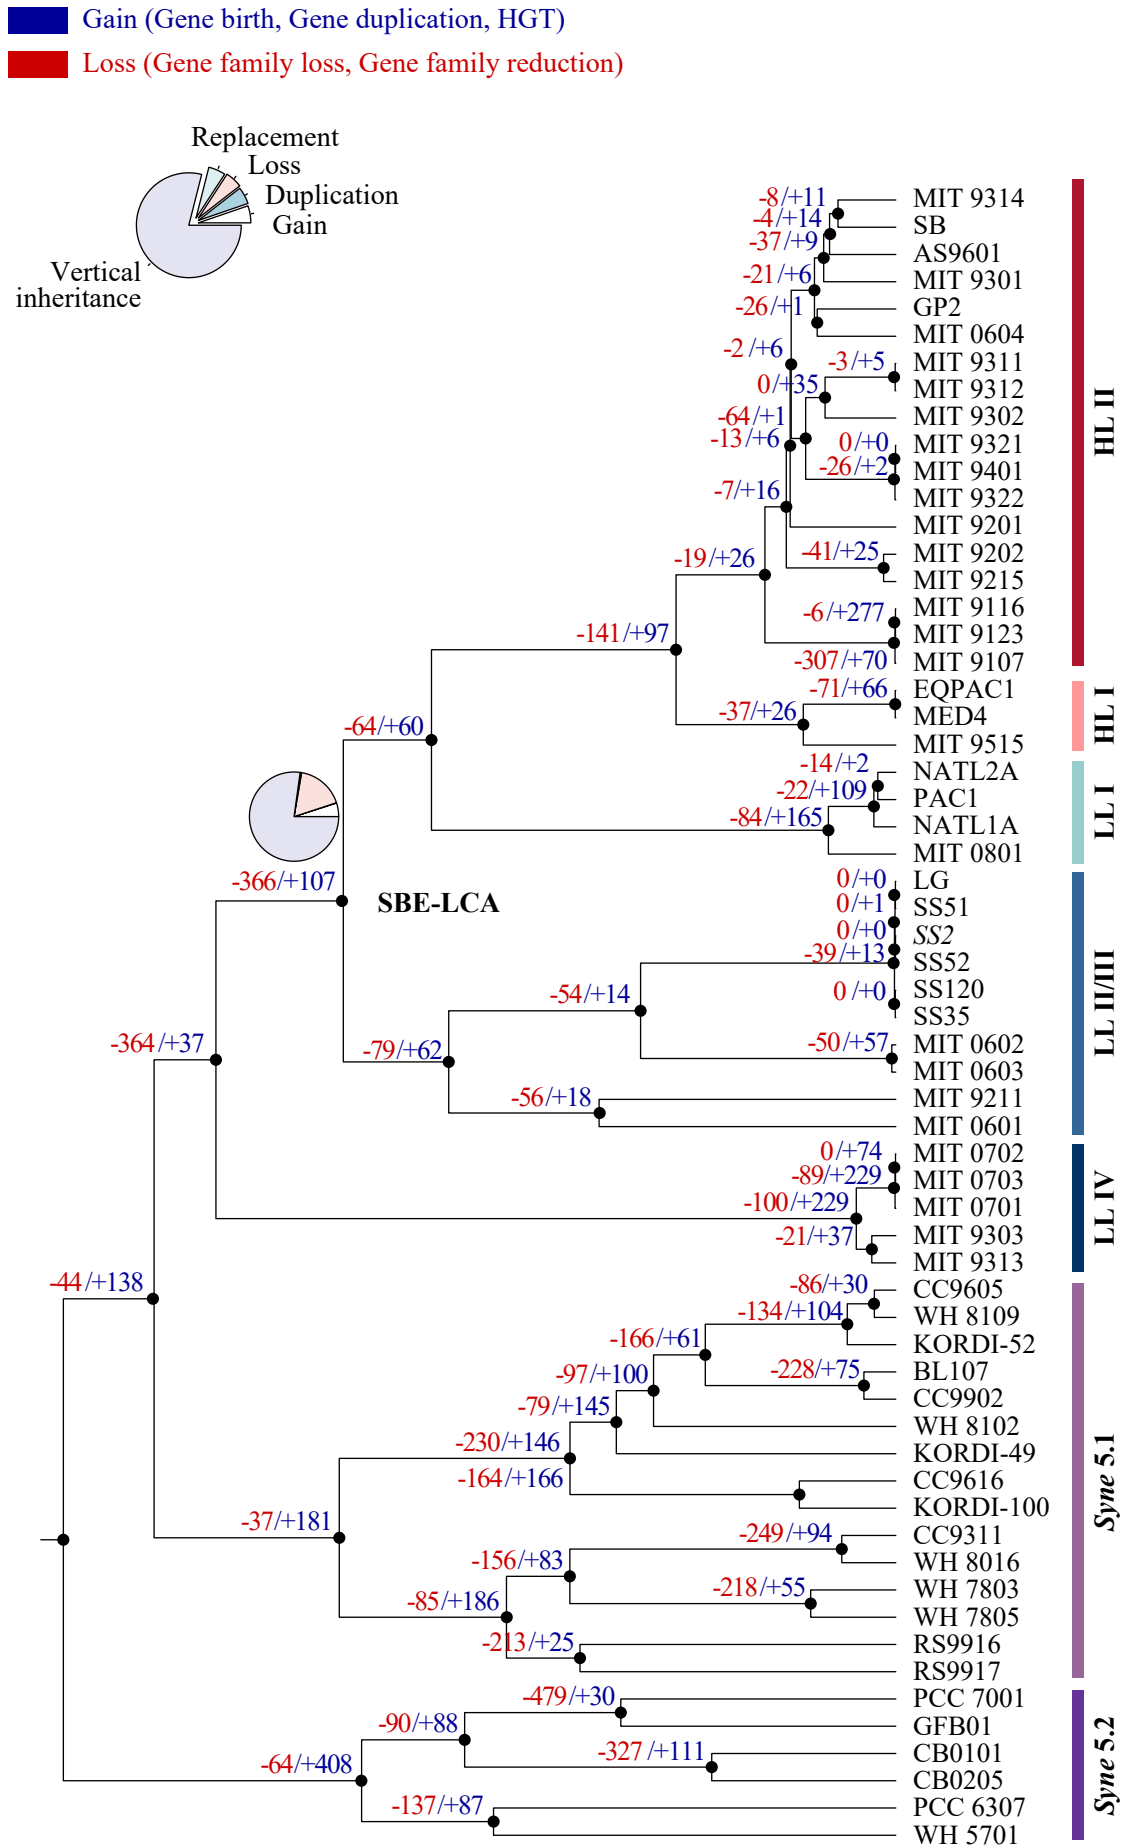

Fig. S1 The number of gene gain and loss events along the genome tree of *Prochlorococcus* and *Synechococcus* reconstructed by AnGST. Gene gain events include gene birth, duplication and HGT, while gene loss events comprise gene family size reduction and loss of entire gene families. The pie chart on the ancestral branches leading to SBE-LCA provides the detailed proportion of each type of genomic event in these key evolutionary stages.

Fig. S2

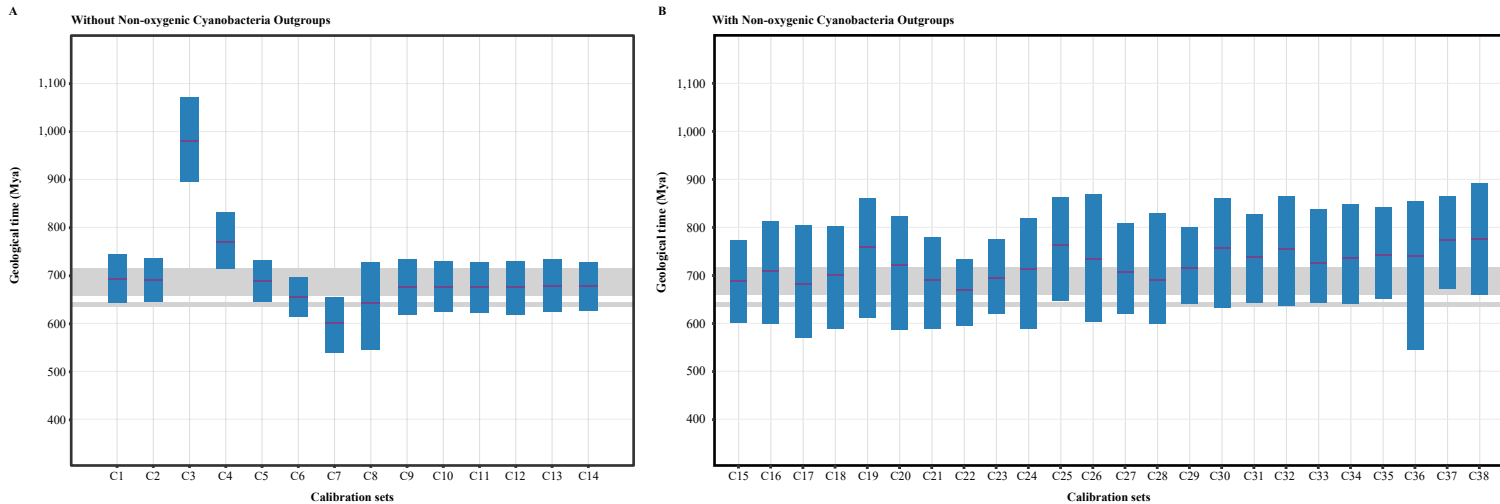

Fig. S2 Divergence time estimates of the ancestral node 'SBE-LCA' based on different calibration sets. (A) Calibration sets used for the phylogeny of oxygenic Cyanobacteria group, including some adapted from previous studies (C1-C6) and others modified in the current study (C7-C14). (B) Calibration sets used for the phylogeny of Cyanobacteria phylum including both oxygenic and non-oxygenic groups (C15-C38). The purple lines and blue vertical bars represent the posterior age estimates and the 95% highest probability density (HPD) intervals, respectively. The upper and the lower horizontal grey bars represent the time of Sturtian glaciation and Marinoan glaciation, respectively.

Fig. S3

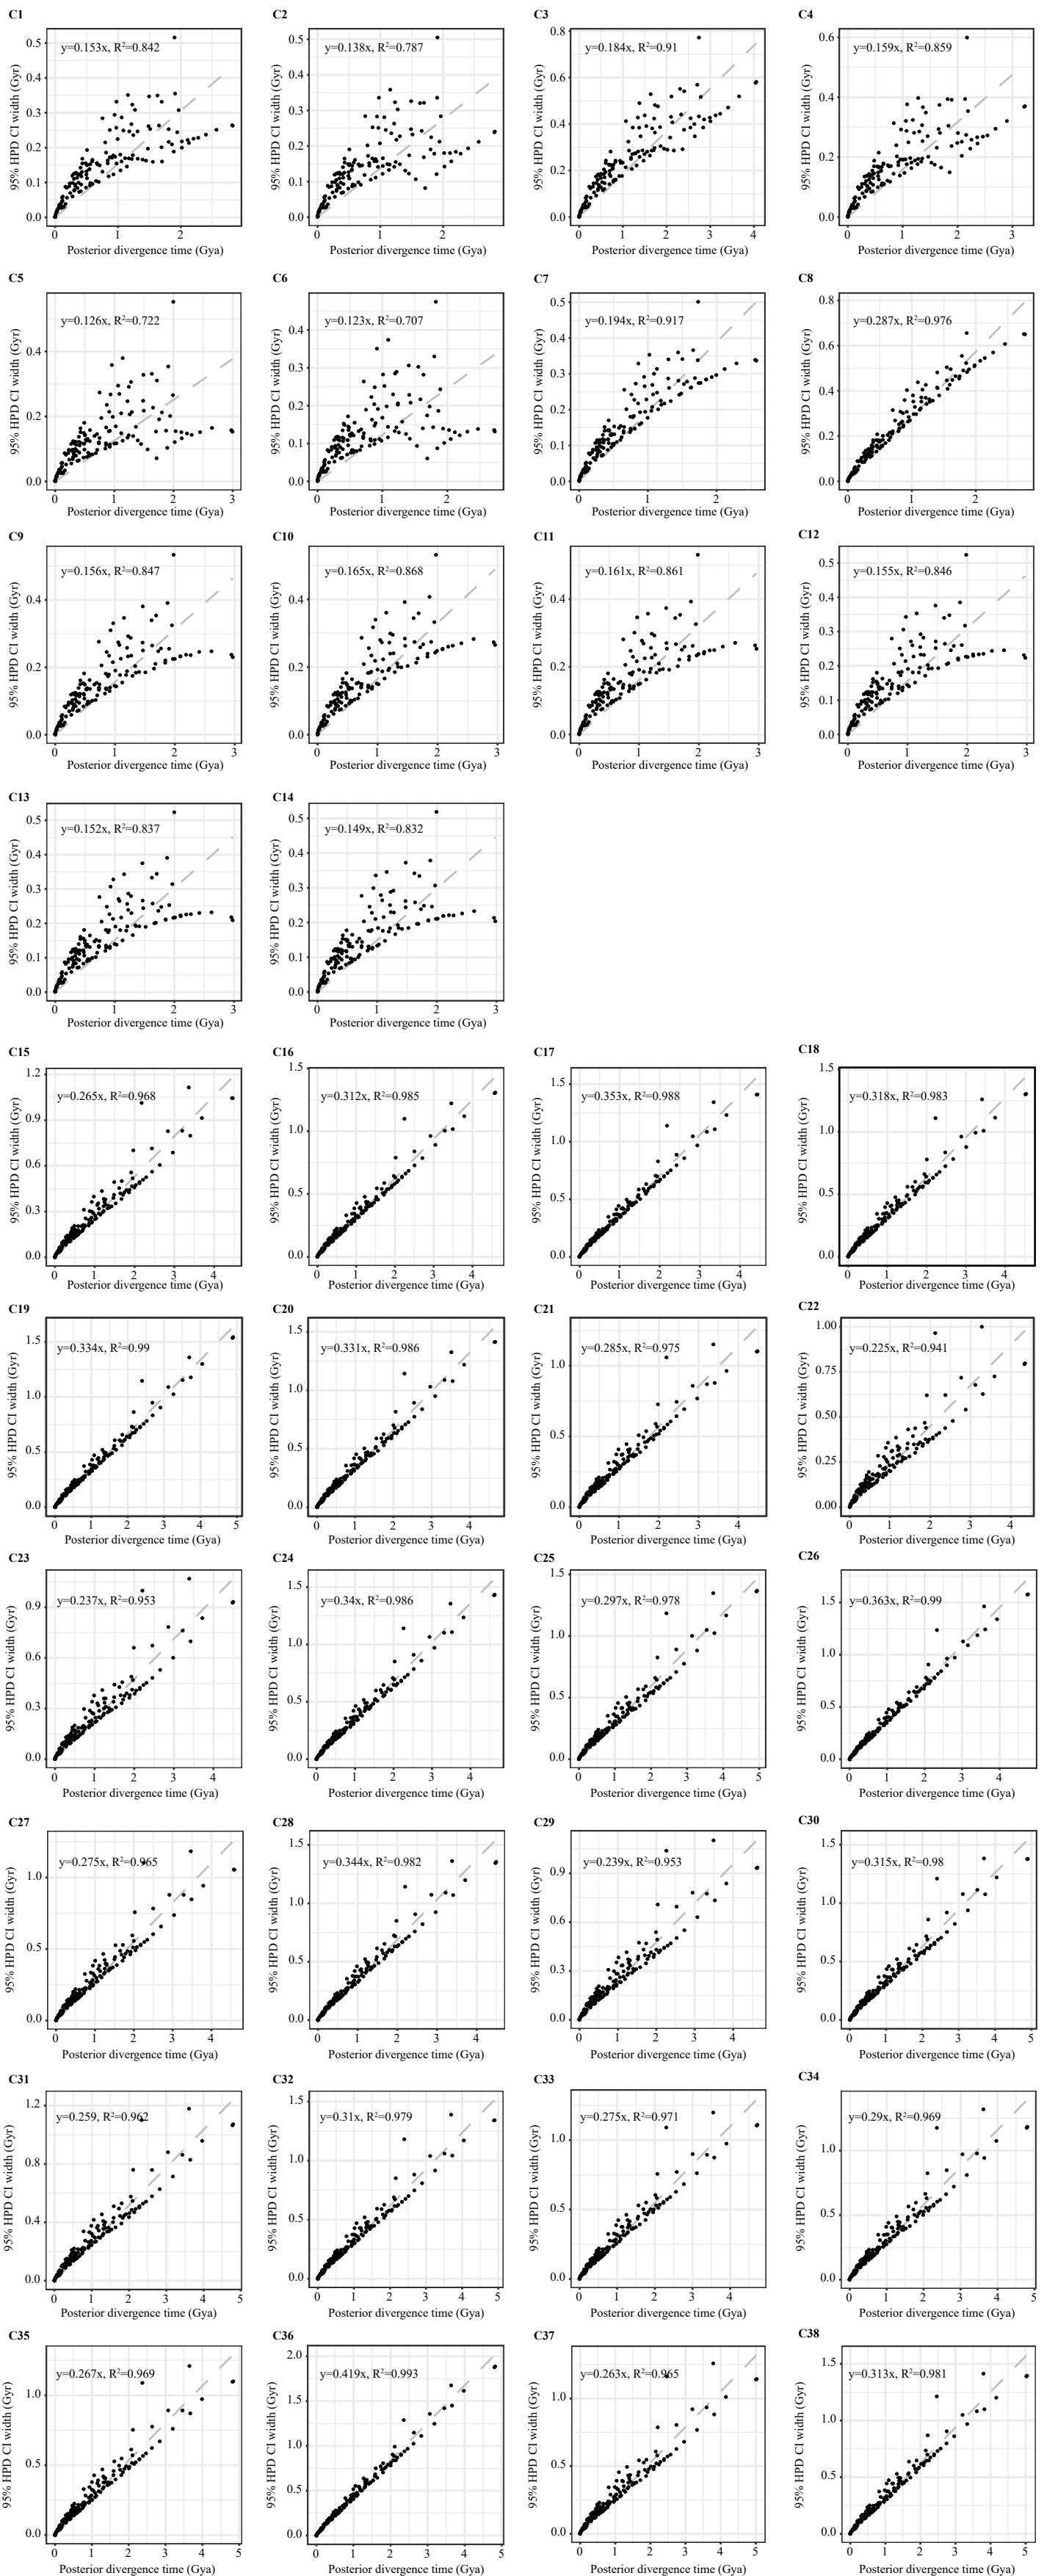

Fig. S3 The infinite-site plots of time estimates based on different calibration sets (C1-C38; see Table S1). The width of the 95% highest probability density (HPD) interval was plotted against the posterior means of the divergence time. A lower slope of the regression line suggests a higher precision of the molecular clock analysis.



Fig. S4 Phylogenomic trees of cyanobacteria based on concatenation of single-copy orthologous gene families at the amino acid sequence level. (A) Maximum likelihood phylogeny of 159 oxygenic Cyanobacteria genomes (Table S2) based on the 214 single-copy gene families shared by these genomes (Table S4). (B) Maximum likelihood phylogeny of 159 oxygenic Cyanobacteria genomes based on the 90 gene families (Table S4) with evidence of compositional homogeneity in the protein sequences. (C) Bayesian inference phylogeny of 159 oxygenic Cyanobacteria genomes based on the 214 gene families. (D) Bayesian inference phylogeny of 159 oxygenic Cyanobacteria genomes based on the 90 gene families with evidence of compositional homogeneity in the protein sequences. The taxonomic classification is adapted from Sanchez-Baracaldo et al. (2015). (E) Maximum likelihood phylogeny of 159 oxygenic Cyanobacteria genomes as well as eight non-oxygenic Cyanobacteria outgroups (Table S2) based on the 90 gene families with evidence of compositional homogeneity in the protein sequences. Trees shown in (D) and (E) are used for molecular dating analyses, and calibrated ancestor nodes are marked with solid orange circle. Solid and open circles at ancestral nodes indicate the percentage of posterior probability or the frequency of the group defined by that node in 100 bootstrapped replicates is at least 95 and 85, respectively.

Macrocyanoacteria

Microcyanoacteria

Basal lineage

Fig. S4 A

RAxML (159 GNMs + 214 FAMs)

Macrocyanoacteria

Microcyanoacteria

Basal lineage

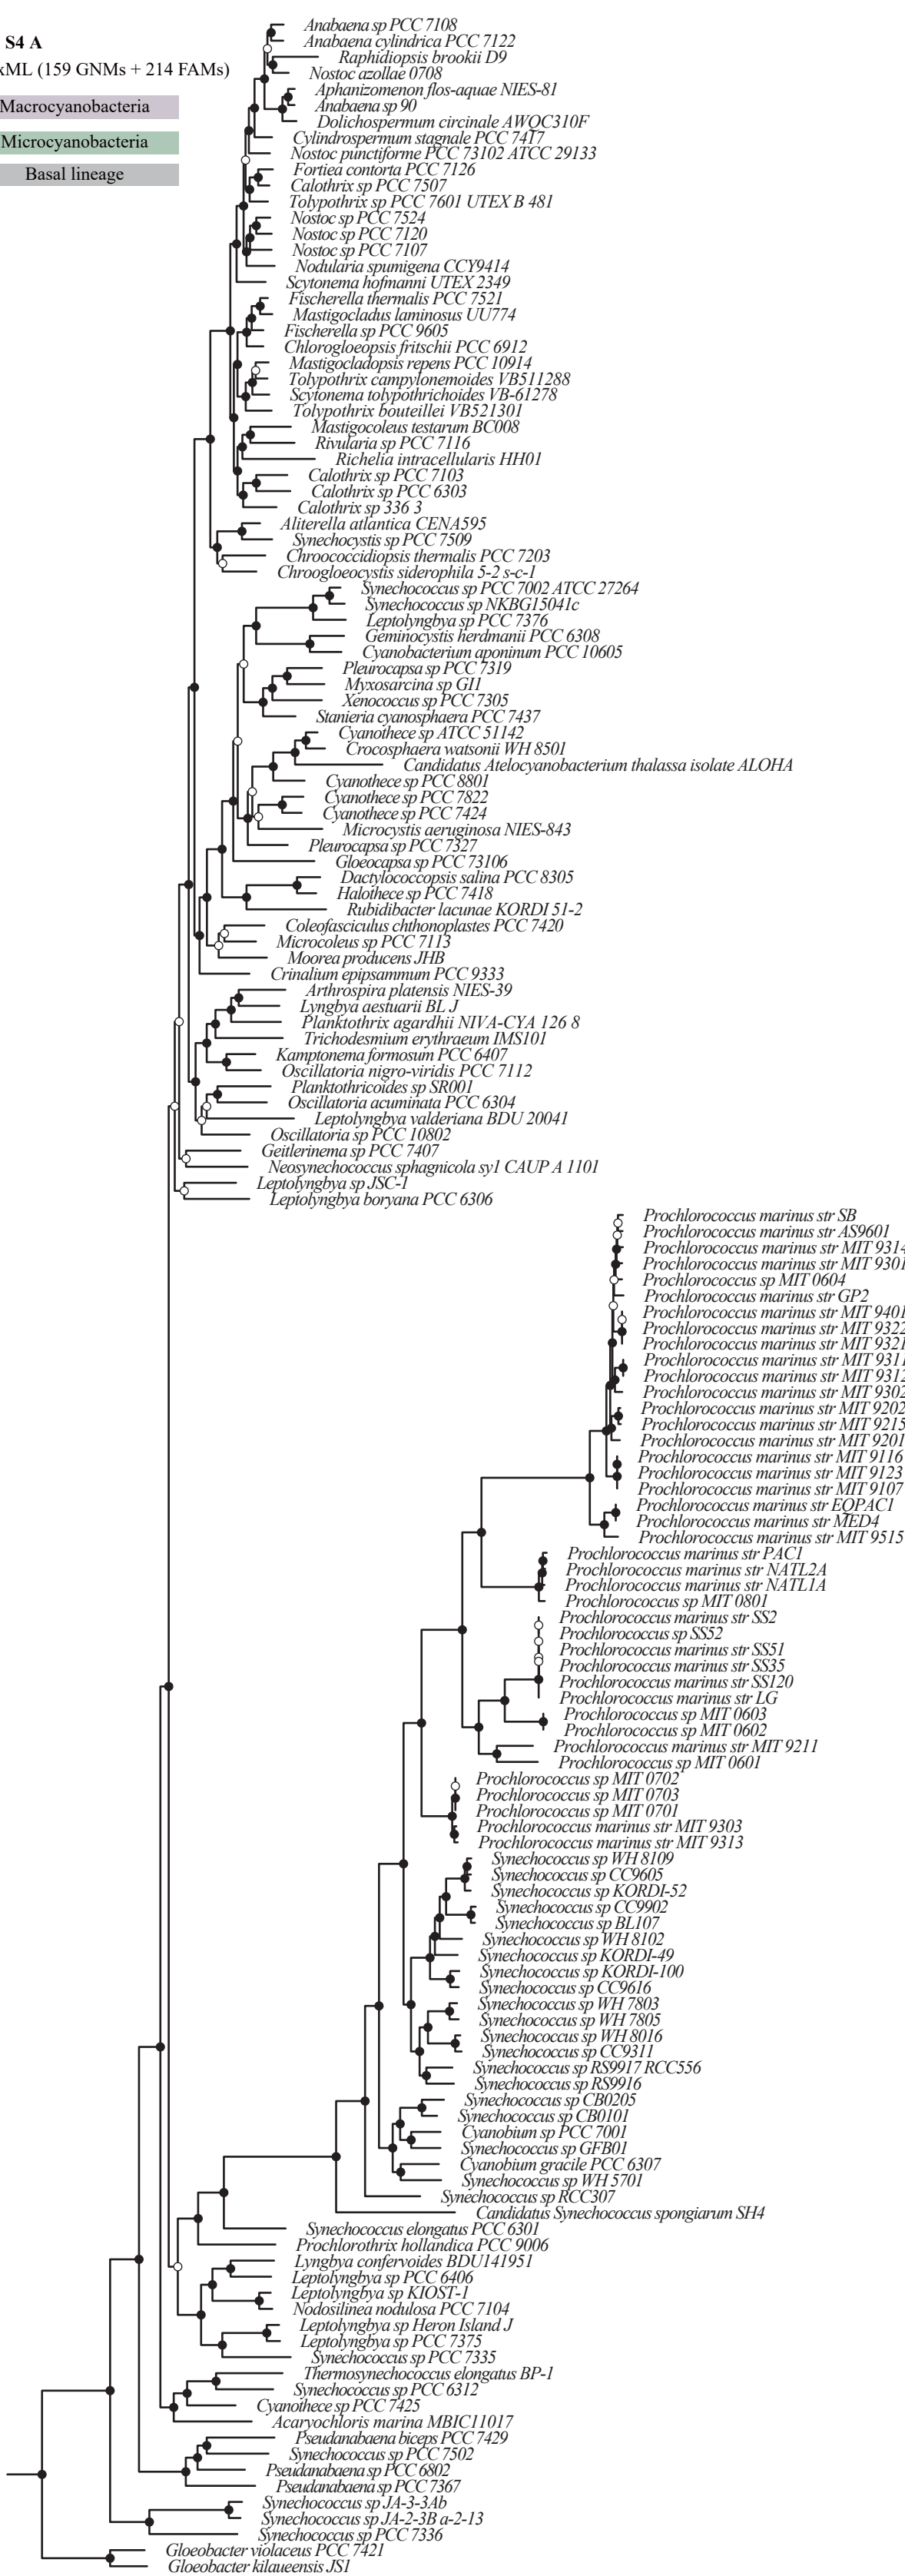

0.3

Fig. S4 B

RAxML (159 GNMs + 90 FAMs)

- Macrocyano bacteria
- Microcyano bacteria
- Basal lineage

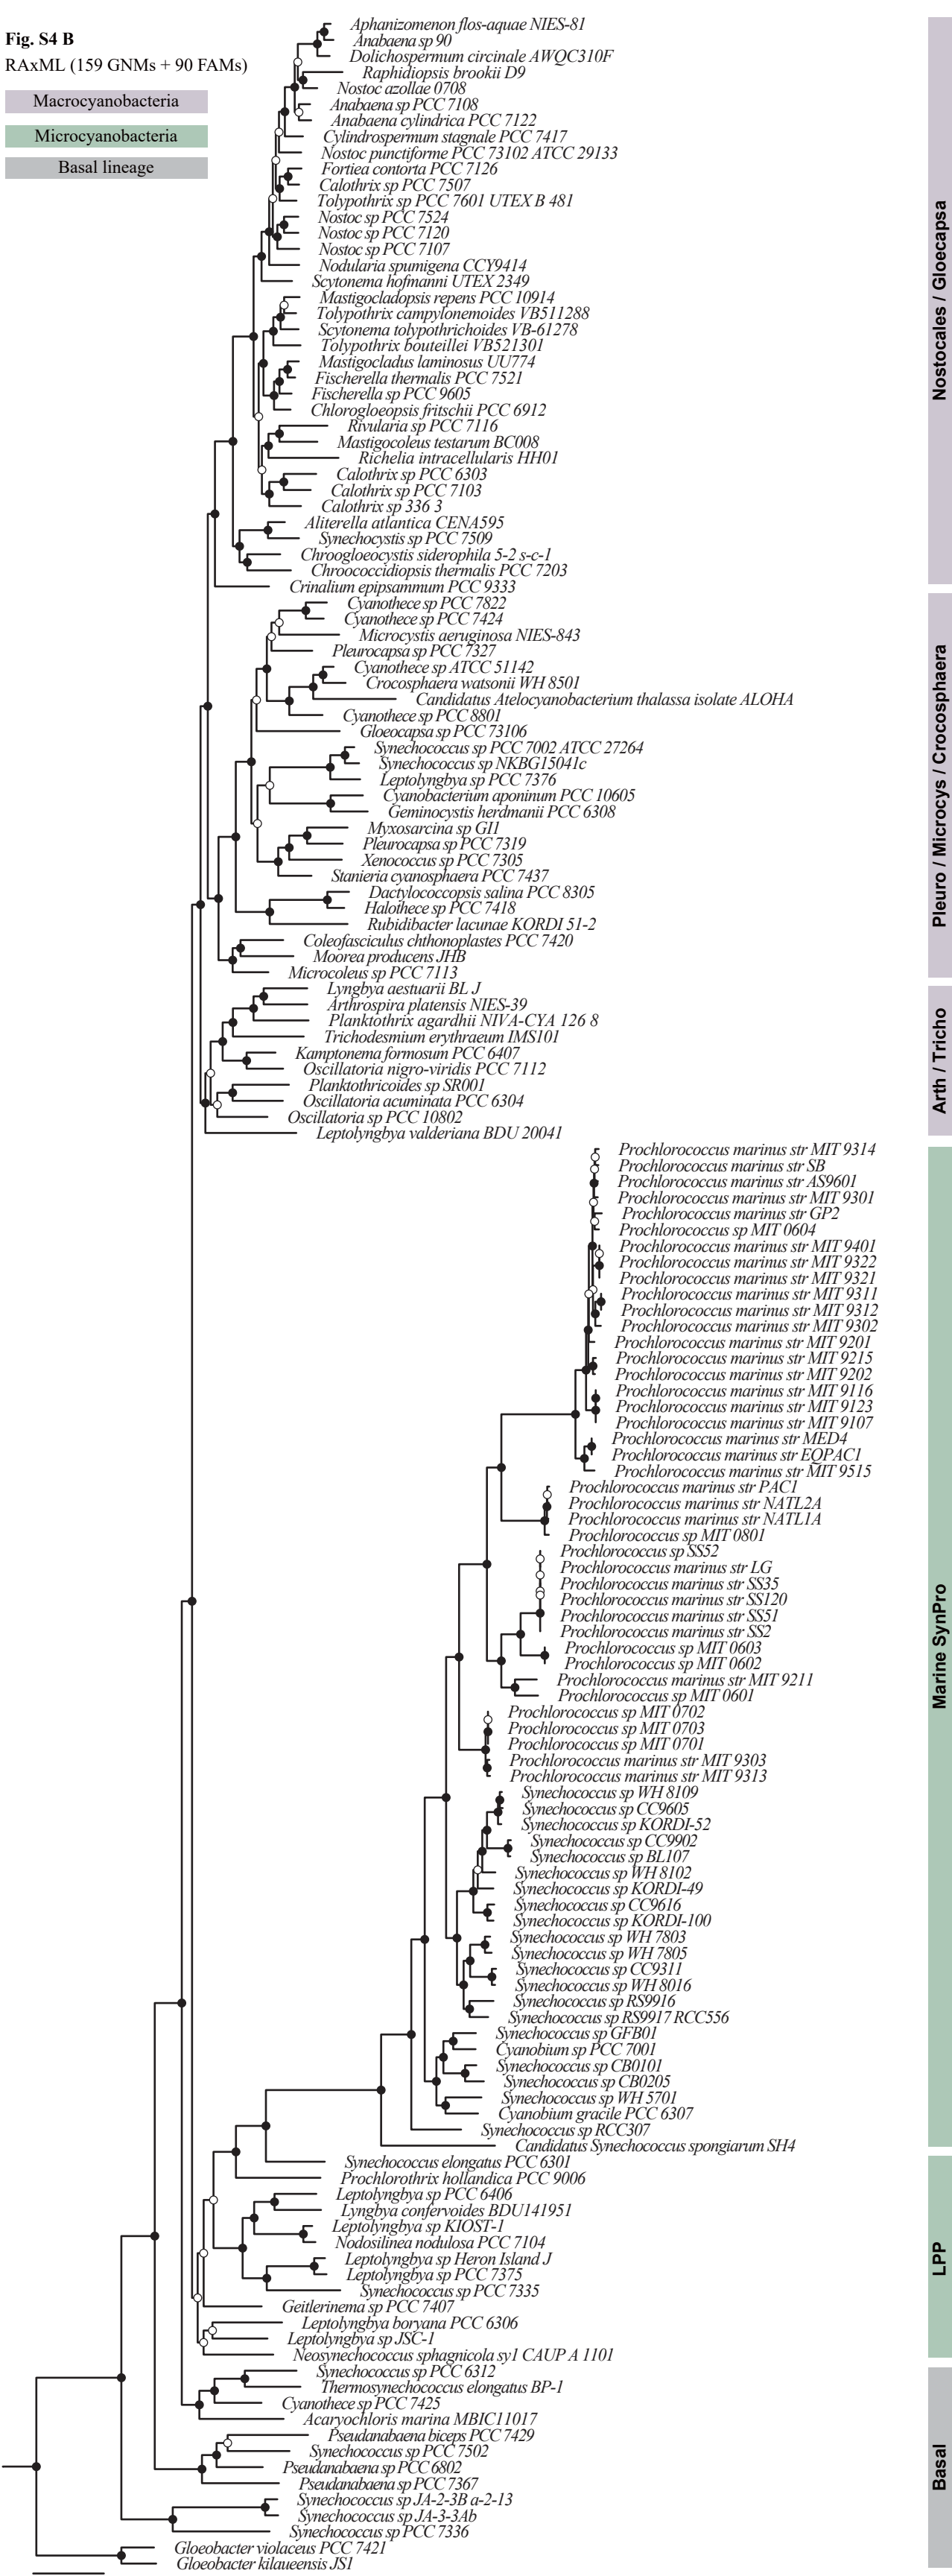

0.2



Fig. S4 C

MrBayes (159 GNM + 214 FAMs)

- Macrocyanoacteria
- Microcyanoacteria
- Basal lineage

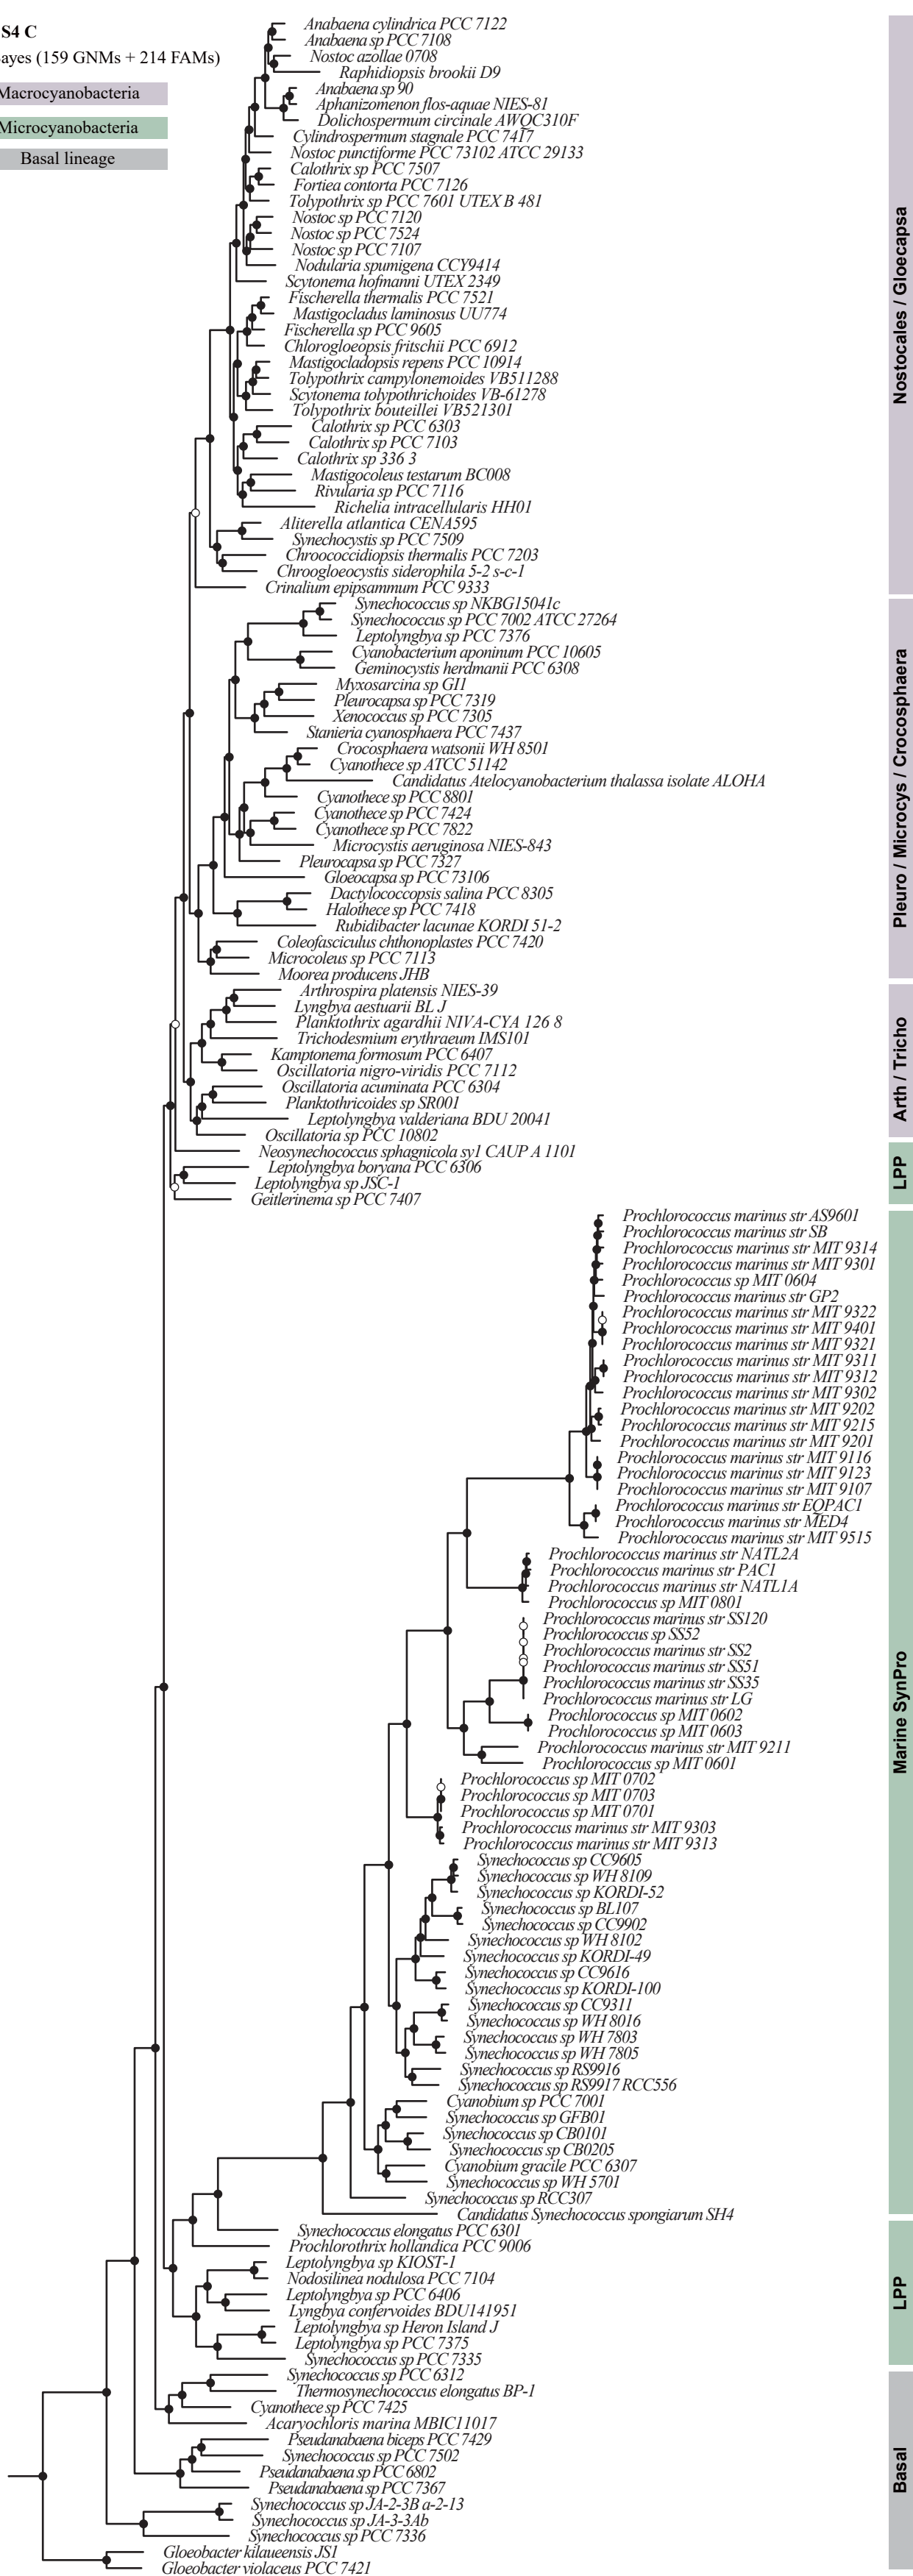

0.2

Fig. S4 D

MrBayes (159 GNMs + 90 FAMs)

- Macrocyanoacteria
- Microcyanoacteria
- Basal lineage

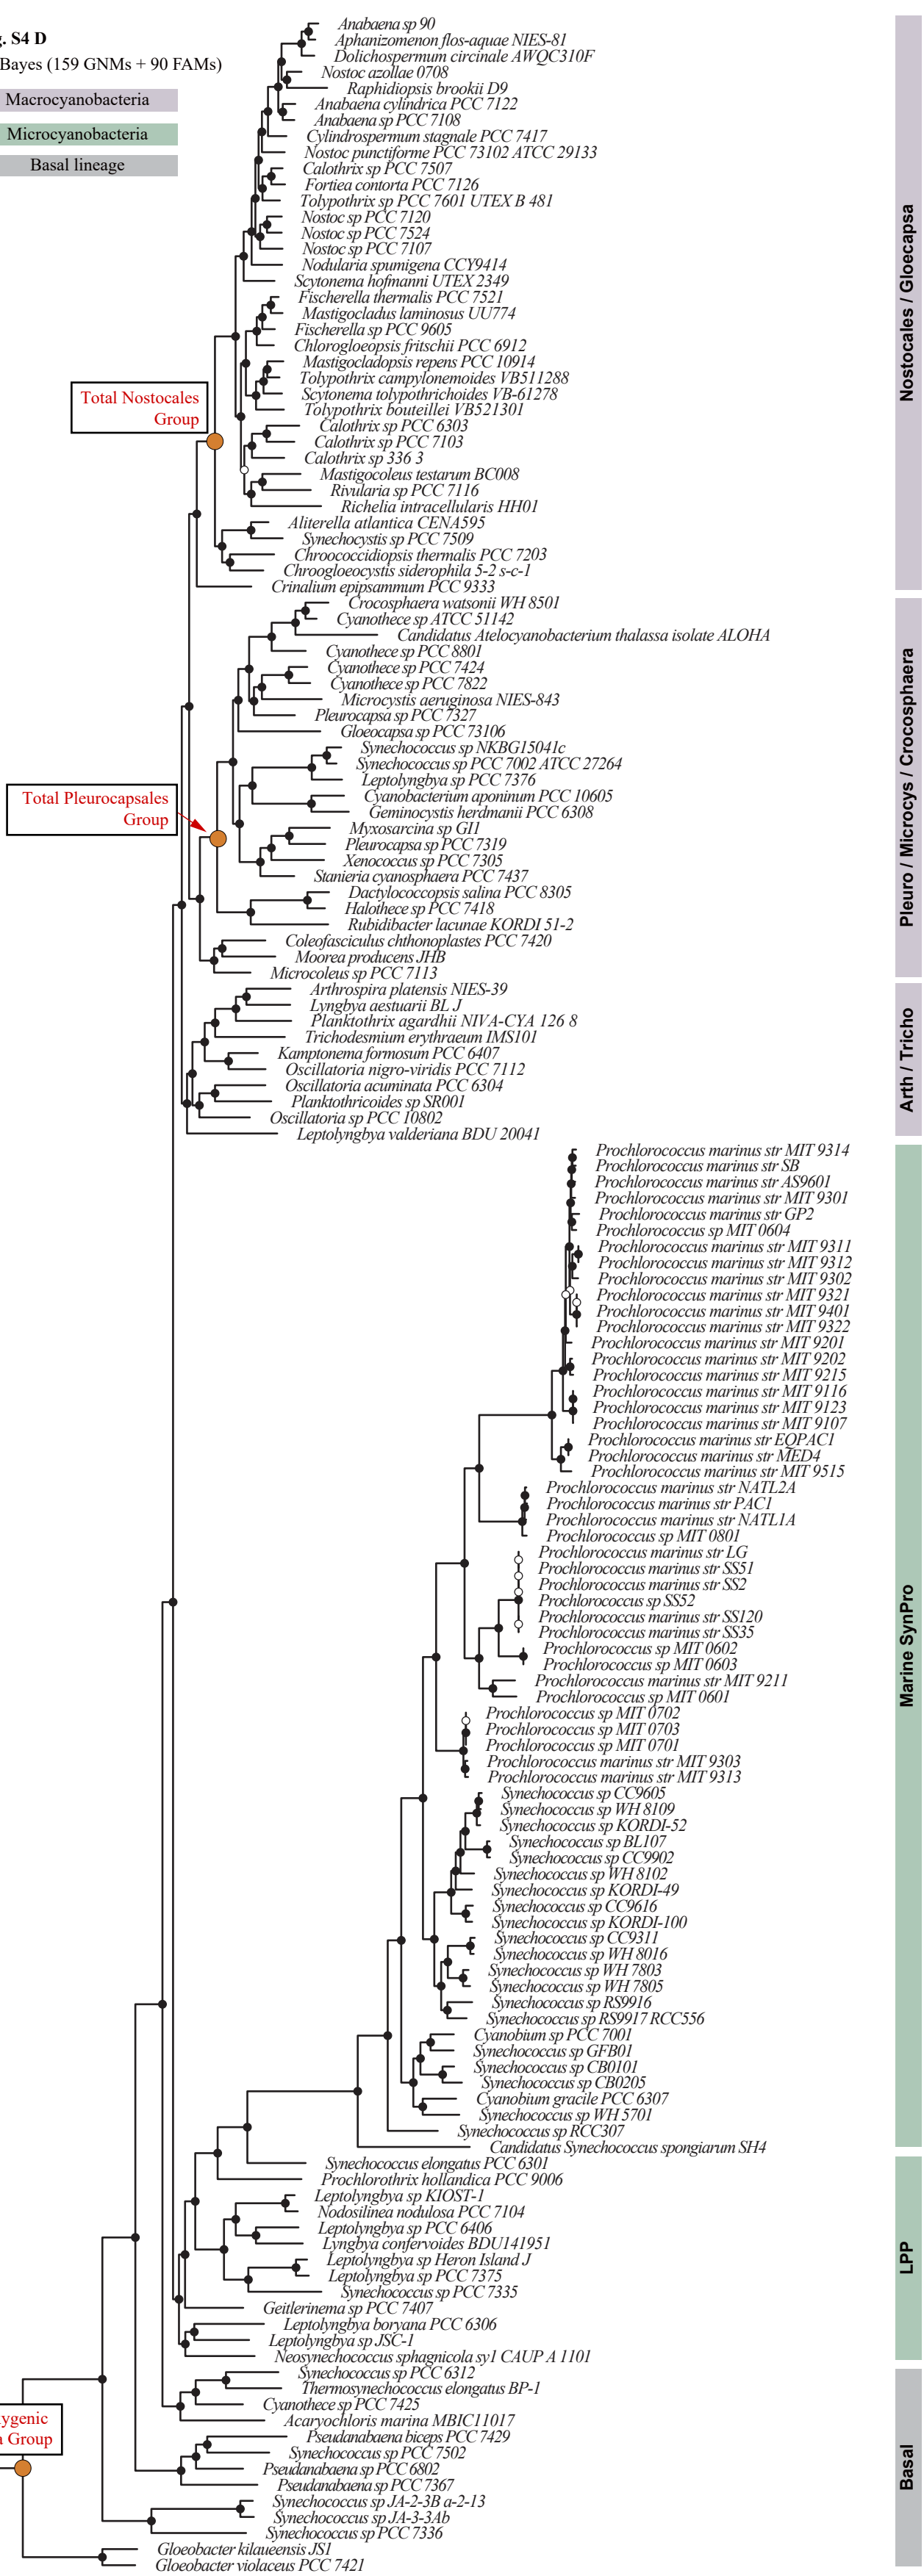



Fig. S4 E

IQ-Tree (167 GNMs + 90 FAMs)

- Macrocyano bacteria
- Microcyano bacteria
- Basal lineage
- Outgroup

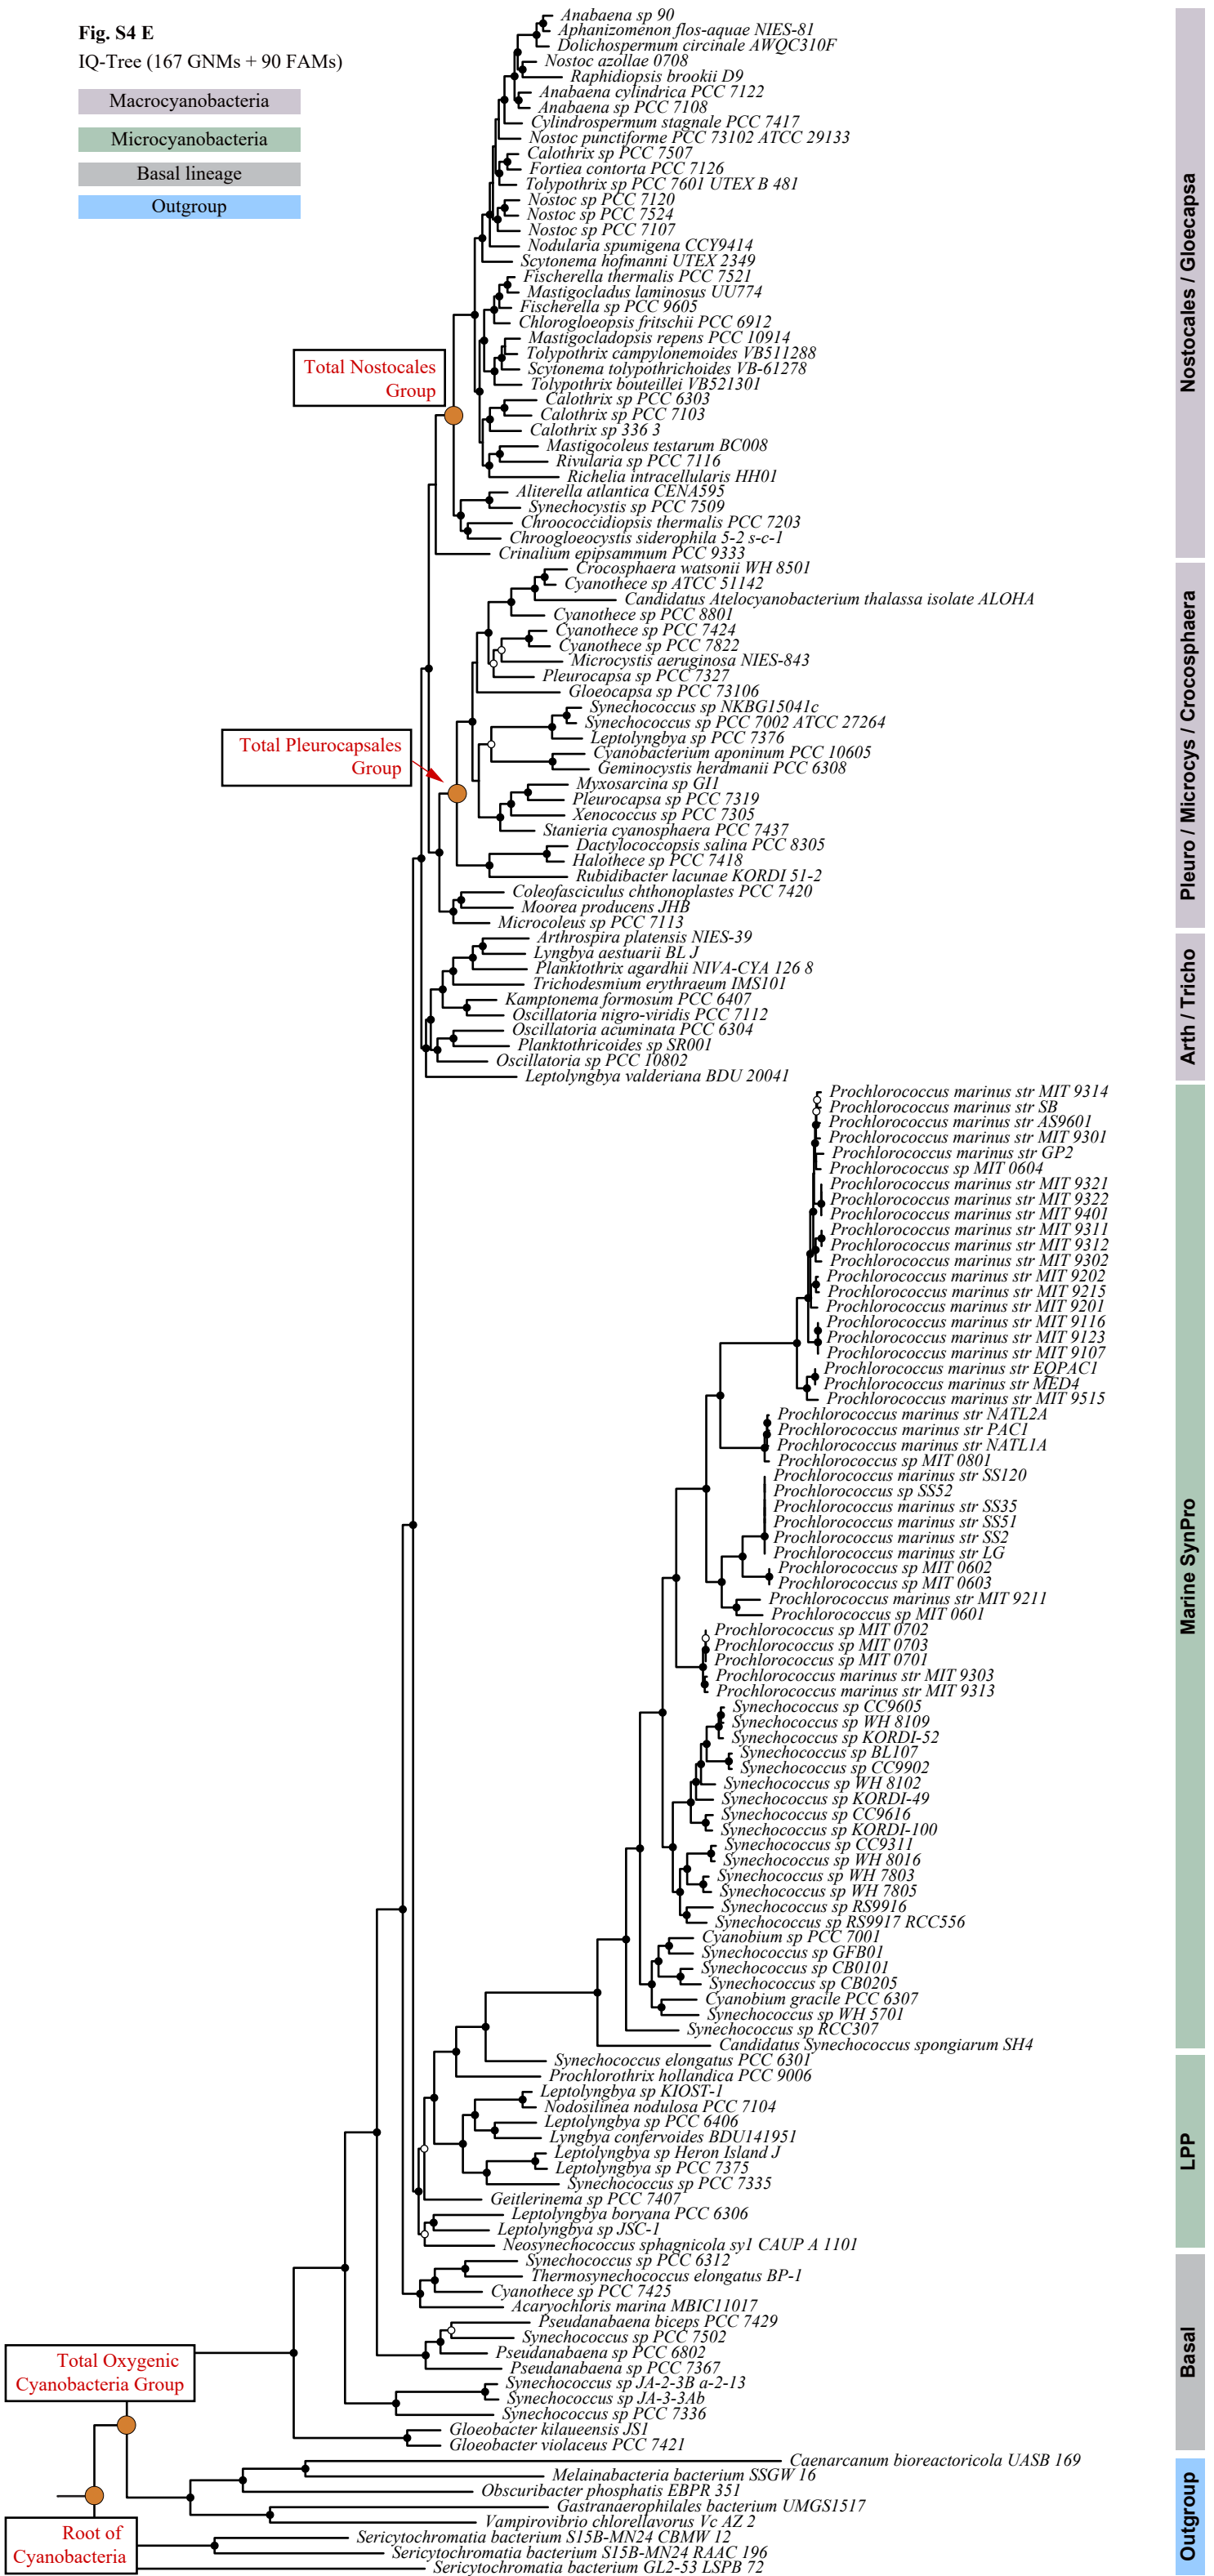

- Anabaena* sp 90
- Aphanizomenon flos-aquae* NIES-81
- Dolichospermum circinale* AWQC310F
- Nostoc azollae* 0708
- Raphidiopsis brookii* D9
- Anabaena cylindrica* PCC 7122
- Anabaena* sp PCC 7108
- Cylindrospermum stagnale* PCC 7417
- Nostoc punctiforme* PCC 73102 ATCC 29133
- Calothrix* sp PCC 7507
- Fortiea contorta* PCC 7126
- Tolypothrix* sp PCC 7601 UTEX B 481
- Nostoc* sp PCC 7120
- Nostoc* sp PCC 7524
- Nostoc* sp PCC 7107
- Nodularia spumigena* CCY9414
- Scytonema hofmanni* UTEX 2349
- Fischerella thermalis* PCC 7521
- Mastigocladus laminosus* UU774
- Fischerella* sp PCC 9605
- Chlorogloeopsis fritschii* PCC 6912
- Mastigocladopsis repens* PCC 10914
- Tolypothrix campylonemoides* VB511288
- Scytonema tolypothrichoides* VB-61278
- Tolypothrix bouteillei* VB521301
- Calothrix* sp PCC 6303
- Calothrix* sp PCC 7103
- Calothrix* sp 336 3
- Mastigocoleus testarum* BC008
- Rivularia* sp PCC 7116
- Richelia intracellularis* HH01
- Aliterella atlantica* CENA595
- Synechocystis* sp PCC 7509
- Chroococciopsis thermalis* PCC 7203
- Chroogloeocystis siderophila* 5-2 s-c-1
- Crinalium epipsammum* PCC 9333
- Crocospaera watsonii* WH 8501
- Cyanothece* sp ATCC 51142
- Candidatus Atelocyanobacterium thalassa isolate* ALOHA
- Cyanothece* sp PCC 8801
- Cyanothece* sp PCC 7424
- Cyanothece* sp PCC 7822
- Microcystis aeruginosa* NIES-843
- Pleurocapsa* sp PCC 7327
- Gloeocapsa* sp PCC 73106
- Synechococcus* sp NKBG15041c
- Synechococcus* sp PCC 7002 ATCC 27264
- Leptolyngbya* sp PCC 7376
- Cyanobacterium aponinum* PCC 10605
- Geminocystis herdmanni* PCC 6308
- Myxosarcina* sp G11
- Pleurocapsa* sp PCC 7319
- Xenococcus* sp PCC 7305
- Stanieria cyanosphaera* PCC 7437
- Dactylococciopsis salina* PCC 8305
- Halothece* sp PCC 7418
- Rubidibacter lacunae* KORDI 51-2
- Coleofasciculus chthonoplastes* PCC 7420
- Moorea producens* JHB
- Microcoleus* sp PCC 7113
- Arthrospira platensis* NIES-39
- Lyngbya aestuarii* BL J
- Planktothrix agardhii* NIVA-CYA 126 8
- Trichodesmium erythraeum* IMS101
- Kamptomena formosum* PCC 6407
- Oscillatoria nigro-viridis* PCC 7112
- Oscillatoria acuminata* PCC 6304
- Planktothricoides* sp SR001
- Oscillatoria* sp PCC 10802
- Leptolyngbya valderiana* BDU 20041
- Prochlorococcus marinus* str MIT 9314
- Prochlorococcus marinus* str SB
- Prochlorococcus marinus* str AS9601
- Prochlorococcus marinus* str MIT 9301
- Prochlorococcus marinus* str GP2
- Prochlorococcus* sp MIT 0604
- Prochlorococcus marinus* str MIT 9321
- Prochlorococcus marinus* str MIT 9322
- Prochlorococcus marinus* str MIT 9401
- Prochlorococcus marinus* str MIT 9311
- Prochlorococcus marinus* str MIT 9312
- Prochlorococcus marinus* str MIT 9302
- Prochlorococcus marinus* str MIT 9202
- Prochlorococcus marinus* str MIT 9215
- Prochlorococcus marinus* str MIT 9201
- Prochlorococcus marinus* str MIT 9116
- Prochlorococcus marinus* str MIT 9123
- Prochlorococcus marinus* str MIT 9107
- Prochlorococcus marinus* str EQPAC1
- Prochlorococcus marinus* str MED4
- Prochlorococcus marinus* str MIT 9515
- Prochlorococcus marinus* str NATL2A
- Prochlorococcus marinus* str PAC1
- Prochlorococcus marinus* str NATL1A
- Prochlorococcus* sp MIT 0801
- Prochlorococcus marinus* str SS120
- Prochlorococcus* sp SS52
- Prochlorococcus marinus* str SS35
- Prochlorococcus marinus* str SS51
- Prochlorococcus marinus* str SS2
- Prochlorococcus marinus* str LG
- Prochlorococcus* sp MIT 0602
- Prochlorococcus* sp MIT 0603
- Prochlorococcus marinus* str MIT 9211
- Prochlorococcus* sp MIT 0601
- Prochlorococcus* sp MIT 0702
- Prochlorococcus* sp MIT 0703
- Prochlorococcus* sp MIT 0701
- Prochlorococcus marinus* str MIT 9303
- Prochlorococcus marinus* str MIT 9313
- Synechococcus* sp CC9605
- Synechococcus* sp WH 8109
- Synechococcus* sp KORDI-52
- Synechococcus* sp BL107
- Synechococcus* sp CC9902
- Synechococcus* sp WH 8102
- Synechococcus* sp KORDI-49
- Synechococcus* sp CC9616
- Synechococcus* sp KORDI-100
- Synechococcus* sp CC9311
- Synechococcus* sp WH 8016
- Synechococcus* sp WH 7803
- Synechococcus* sp WH 7805
- Synechococcus* sp RS9916
- Synechococcus* sp RS9917 RCC556
- Cyanobium* sp PCC 7001
- Synechococcus* sp GFB01
- Synechococcus* sp CB0101
- Synechococcus* sp CB0205
- Cyanobium gracile* PCC 6307
- Synechococcus* sp WH 5701
- Synechococcus* sp RCC307
- Candidatus Synechococcus spongiorum* SH4
- Synechococcus elongatus* PCC 6301
- Prochlorothrix hollandica* PCC 9006
- Leptolyngbya* sp KIOST-1
- Nodosilinea nodulosa* PCC 7104
- Leptolyngbya* sp PCC 6406
- Lyngbya confervoides* BDU141951
- Leptolyngbya* sp Heron Island J
- Leptolyngbya* sp PCC 7375
- Synechococcus* sp PCC 7335
- Geitlerinema* sp PCC 7407
- Leptolyngbya boryana* PCC 6306
- Leptolyngbya* sp JSC-1
- Neosynechococcus sphagnicola* sy1 CAUP A 1101
- Synechococcus* sp PCC 6312
- Thermosynechococcus elongatus* BP-1
- Cyanothece* sp PCC 7425
- Acaryochloris marina* MBIC11017
- Pseudanabaena biceps* PCC 7429
- Synechococcus* sp PCC 7502
- Pseudanabaena* sp PCC 6802
- Pseudanabaena* sp PCC 7367
- Synechococcus* sp JA-2-3B a-2-13
- Synechococcus* sp JA-3-3Ab
- Synechococcus* sp PCC 7336
- Gloeobacter kilauensis* JS1
- Gloeobacter violaceus* PCC 7421
- Caenarcum bioreactoricola* UASB 169
- Melainabacteria bacterium* SSGW 16
- Obscuribacter phosphatis* EBPR 351
- Gastranaerophilales bacterium* UMGS1517
- Vampirovibrio chlorellavorus* Vc AZ 2
- Sericytochromatia bacterium* S15B-MN24 CBMW 12
- Sericytochromatia bacterium* S15B-MN24 RAAC 196
- Sericytochromatia bacterium* GL2-53 LSPB 72

Fig. S5

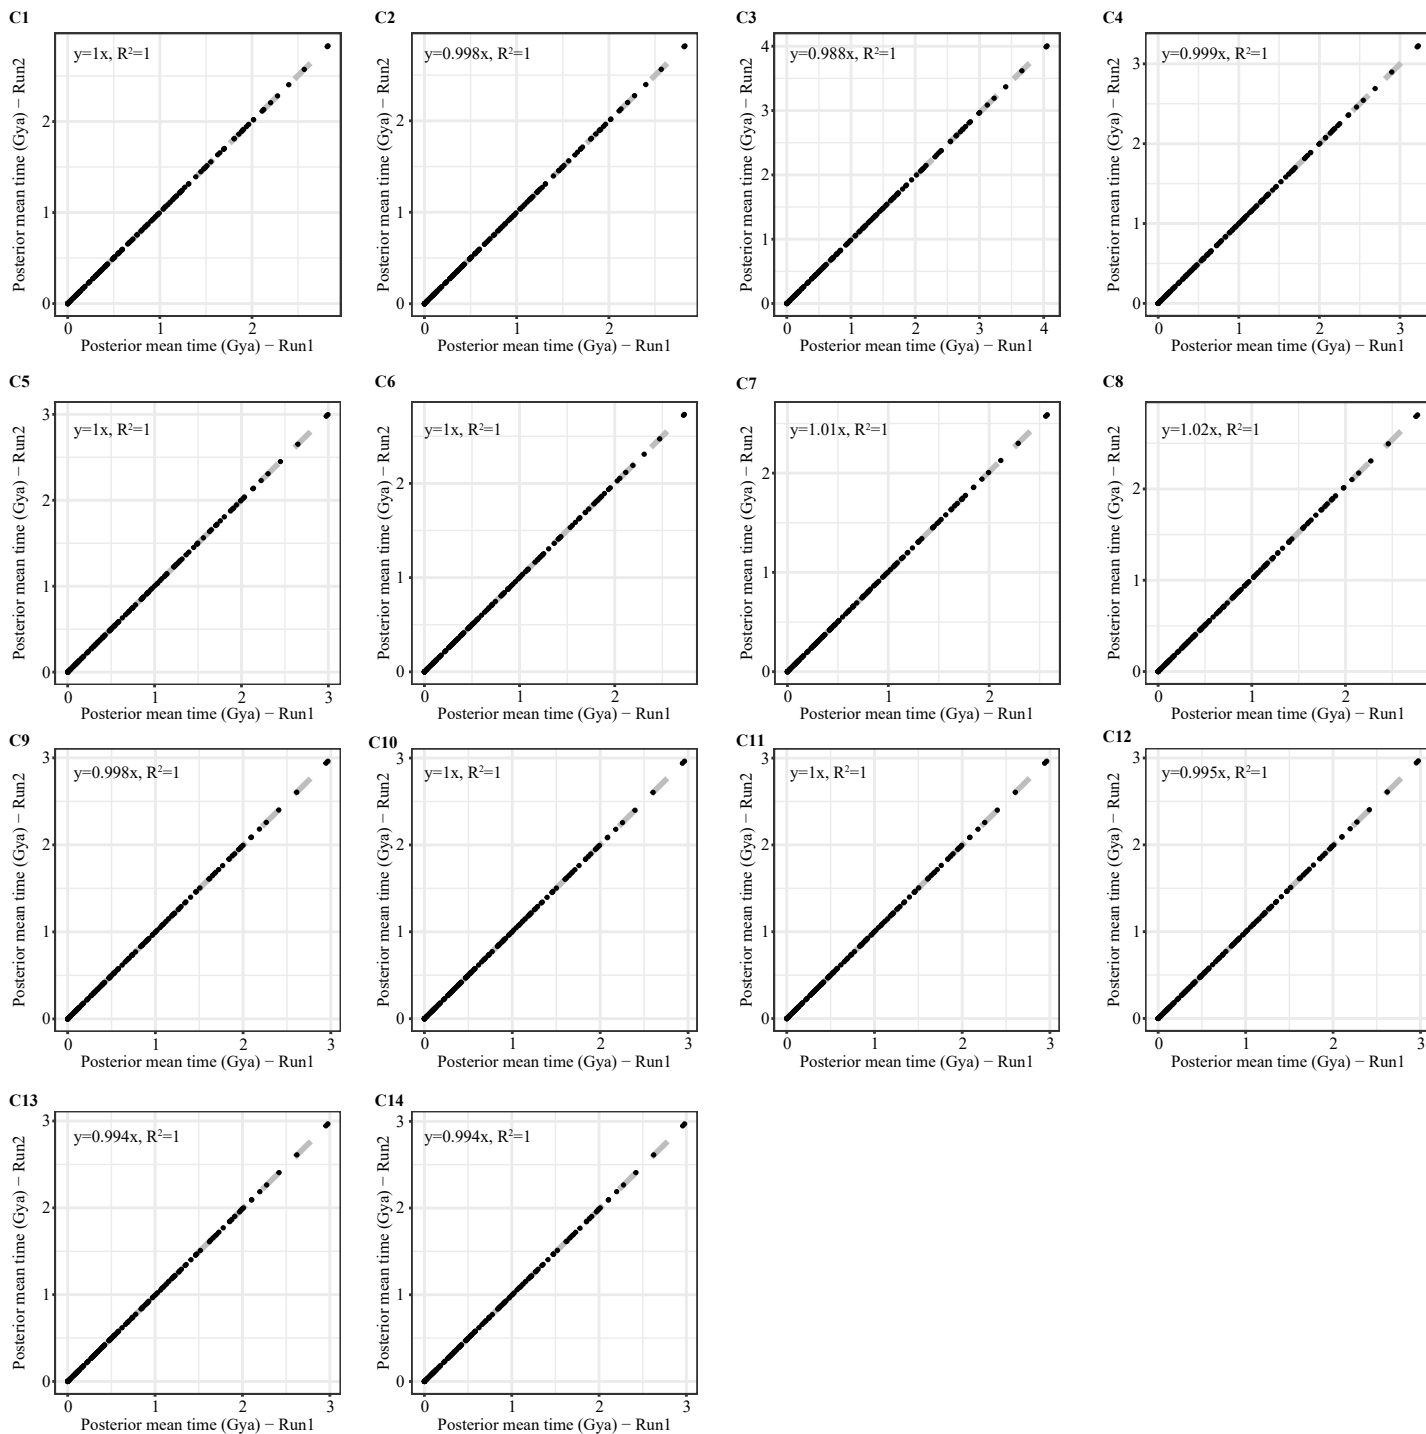

Fig. S5 Correlation of the posterior mean of estimated ages on ancestral nodes in replicated MCMC runs based on calibration sets C1-C14. Convergence of independent runs is achieved if points fall almost perfectly on the  $y=x$  line.

Fig. S6

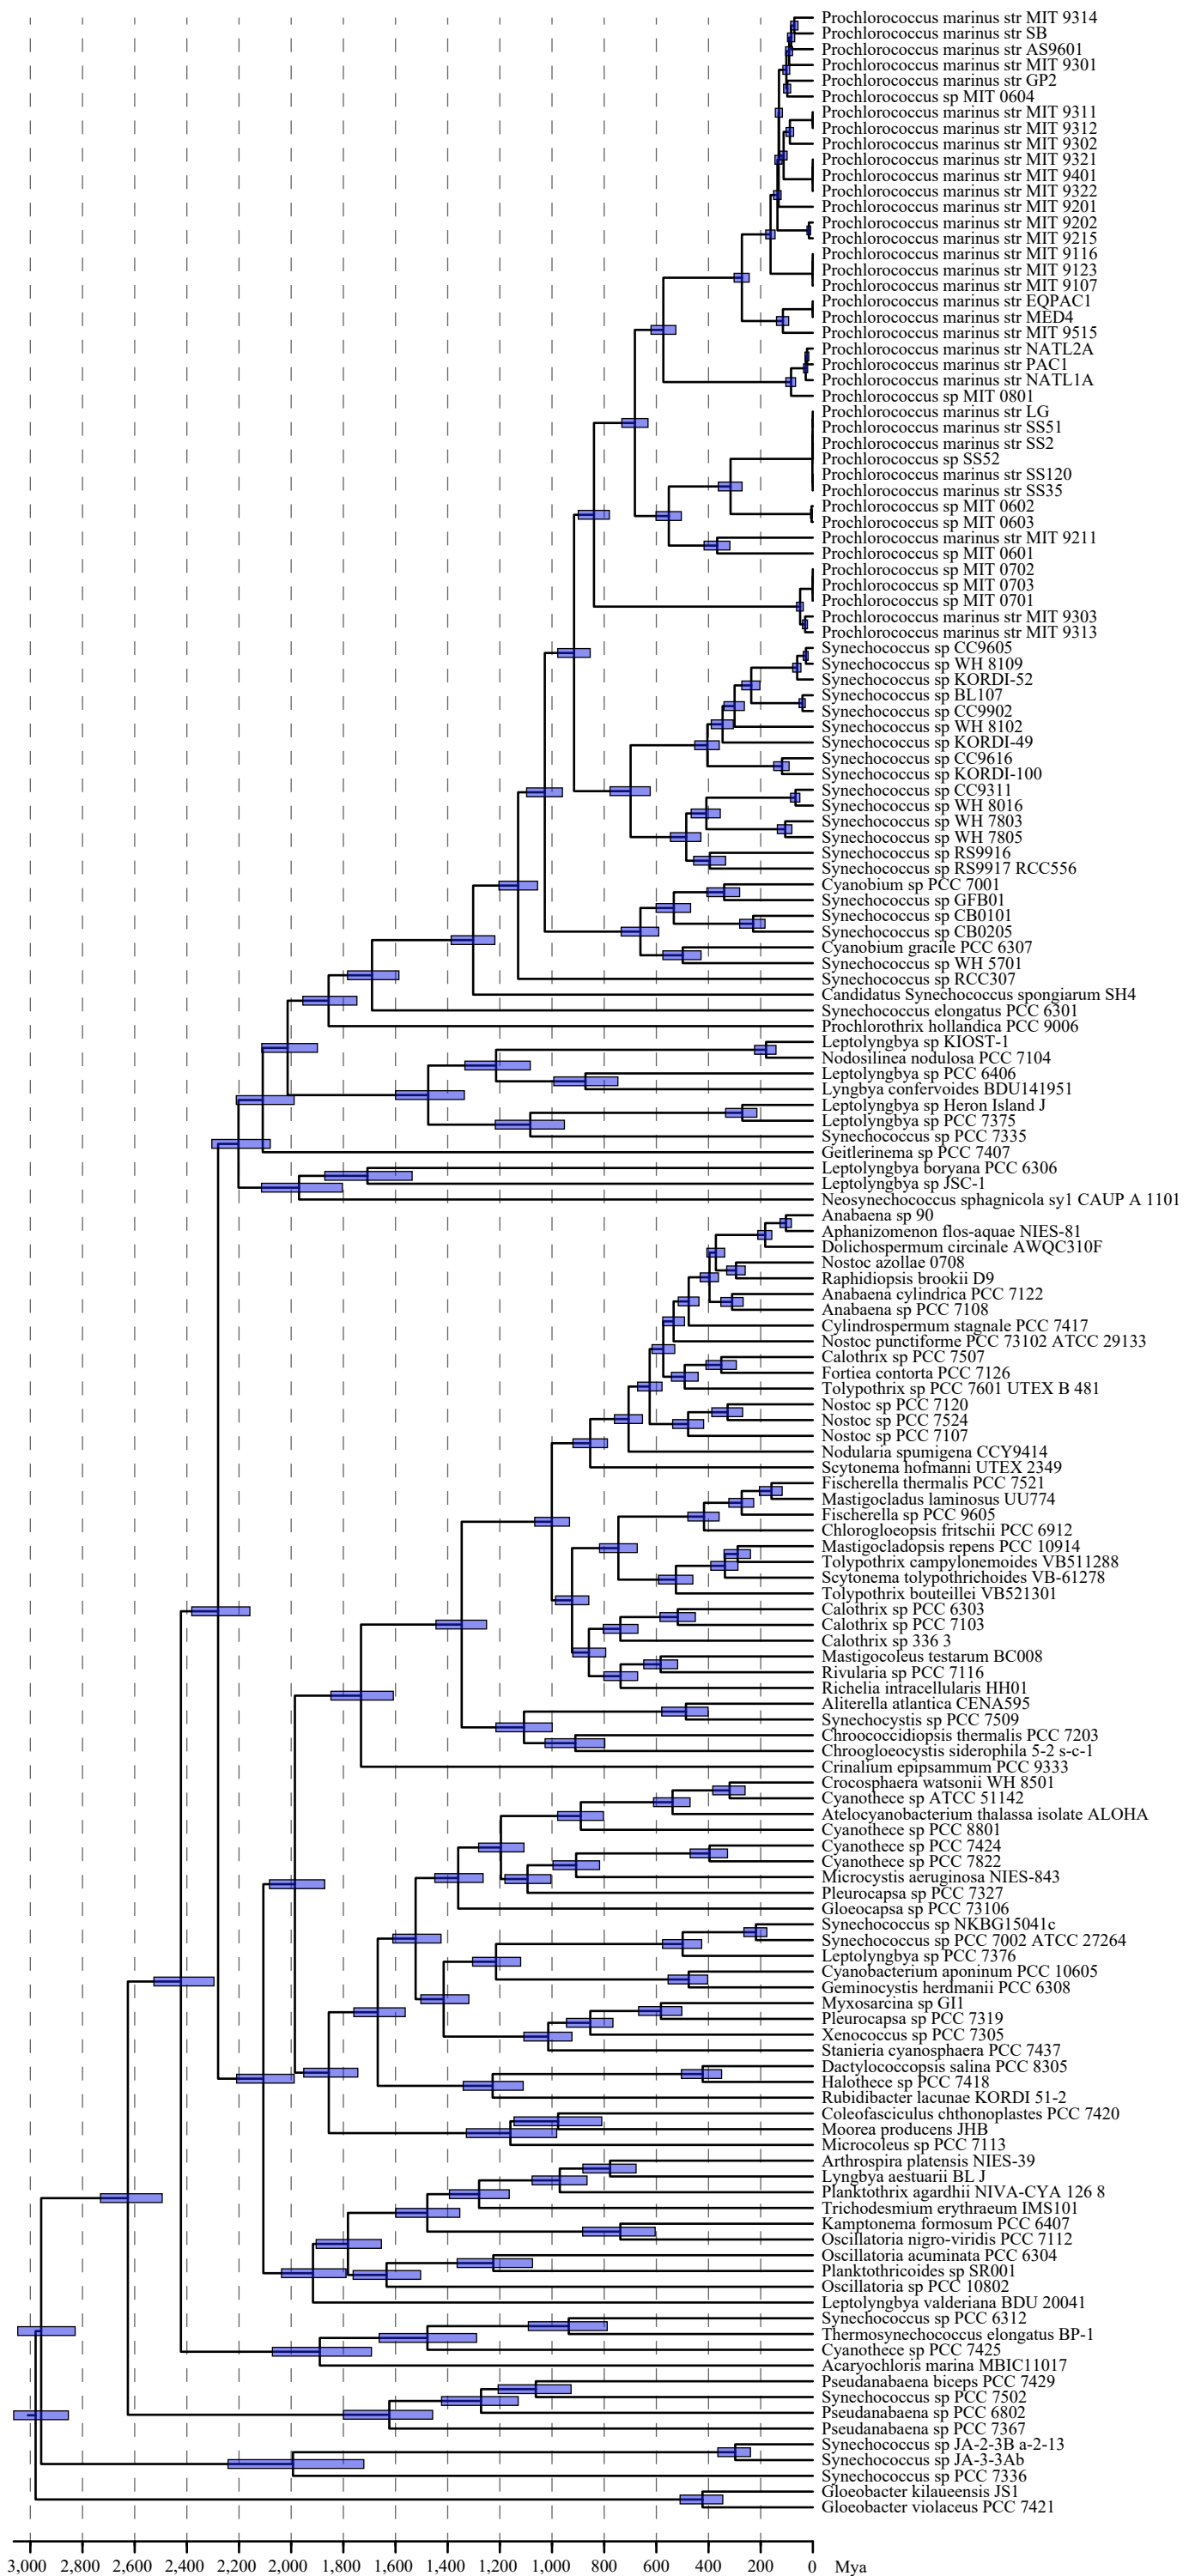

Fig. S6 A chronogram of cyanobacteria reconstructed with a relaxed molecular analysis implemented in MCMCTree. The molecular dating analysis uses 27 genes, a Bayesian phylogenomic tree of 159 genomes constructed with protein sequences of 90 gene families under the calibration set C14.



Fig. S7

A

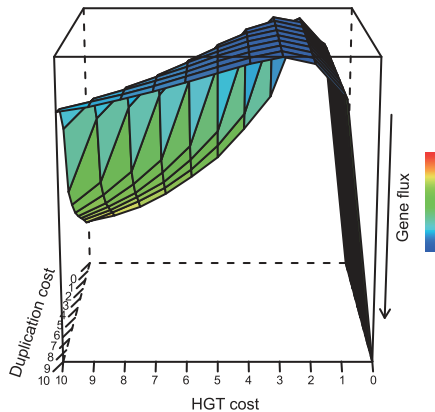

B

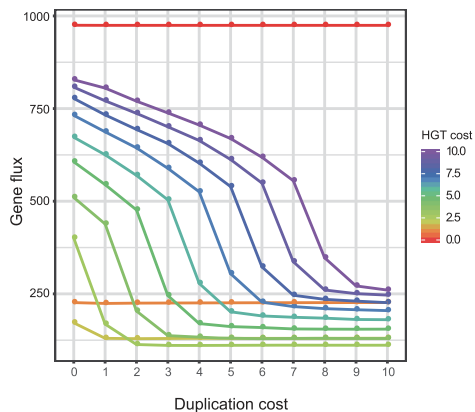

C

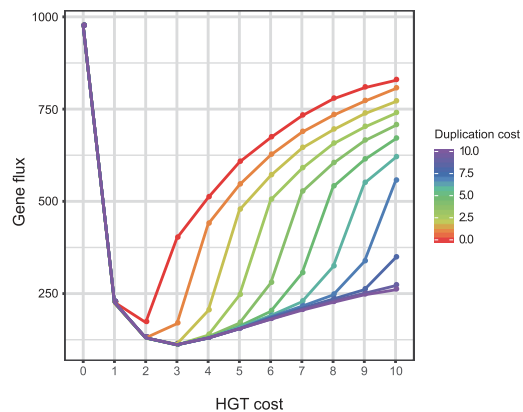

Fig. S7 The number of gene gains and losses (i.e., gene flux) reconstructed by AnGST depends on the penalty set for horizontal gene transfer (HGT) and gene duplication events relative to the penalty of gene loss events which was fixed to 1. (A) A 3-D plot showing gene flux with increased penalty of duplication and HGT events which ranges from 0 to 10. The color scheme represents the amount of gene flux. (B) The change of gene flux along with the increased penalty of duplication under different settings of HGT penalty (color). (C) The change of gene flux along with the increased penalty of HGT under different settings of duplication penalty.

Fig. S8

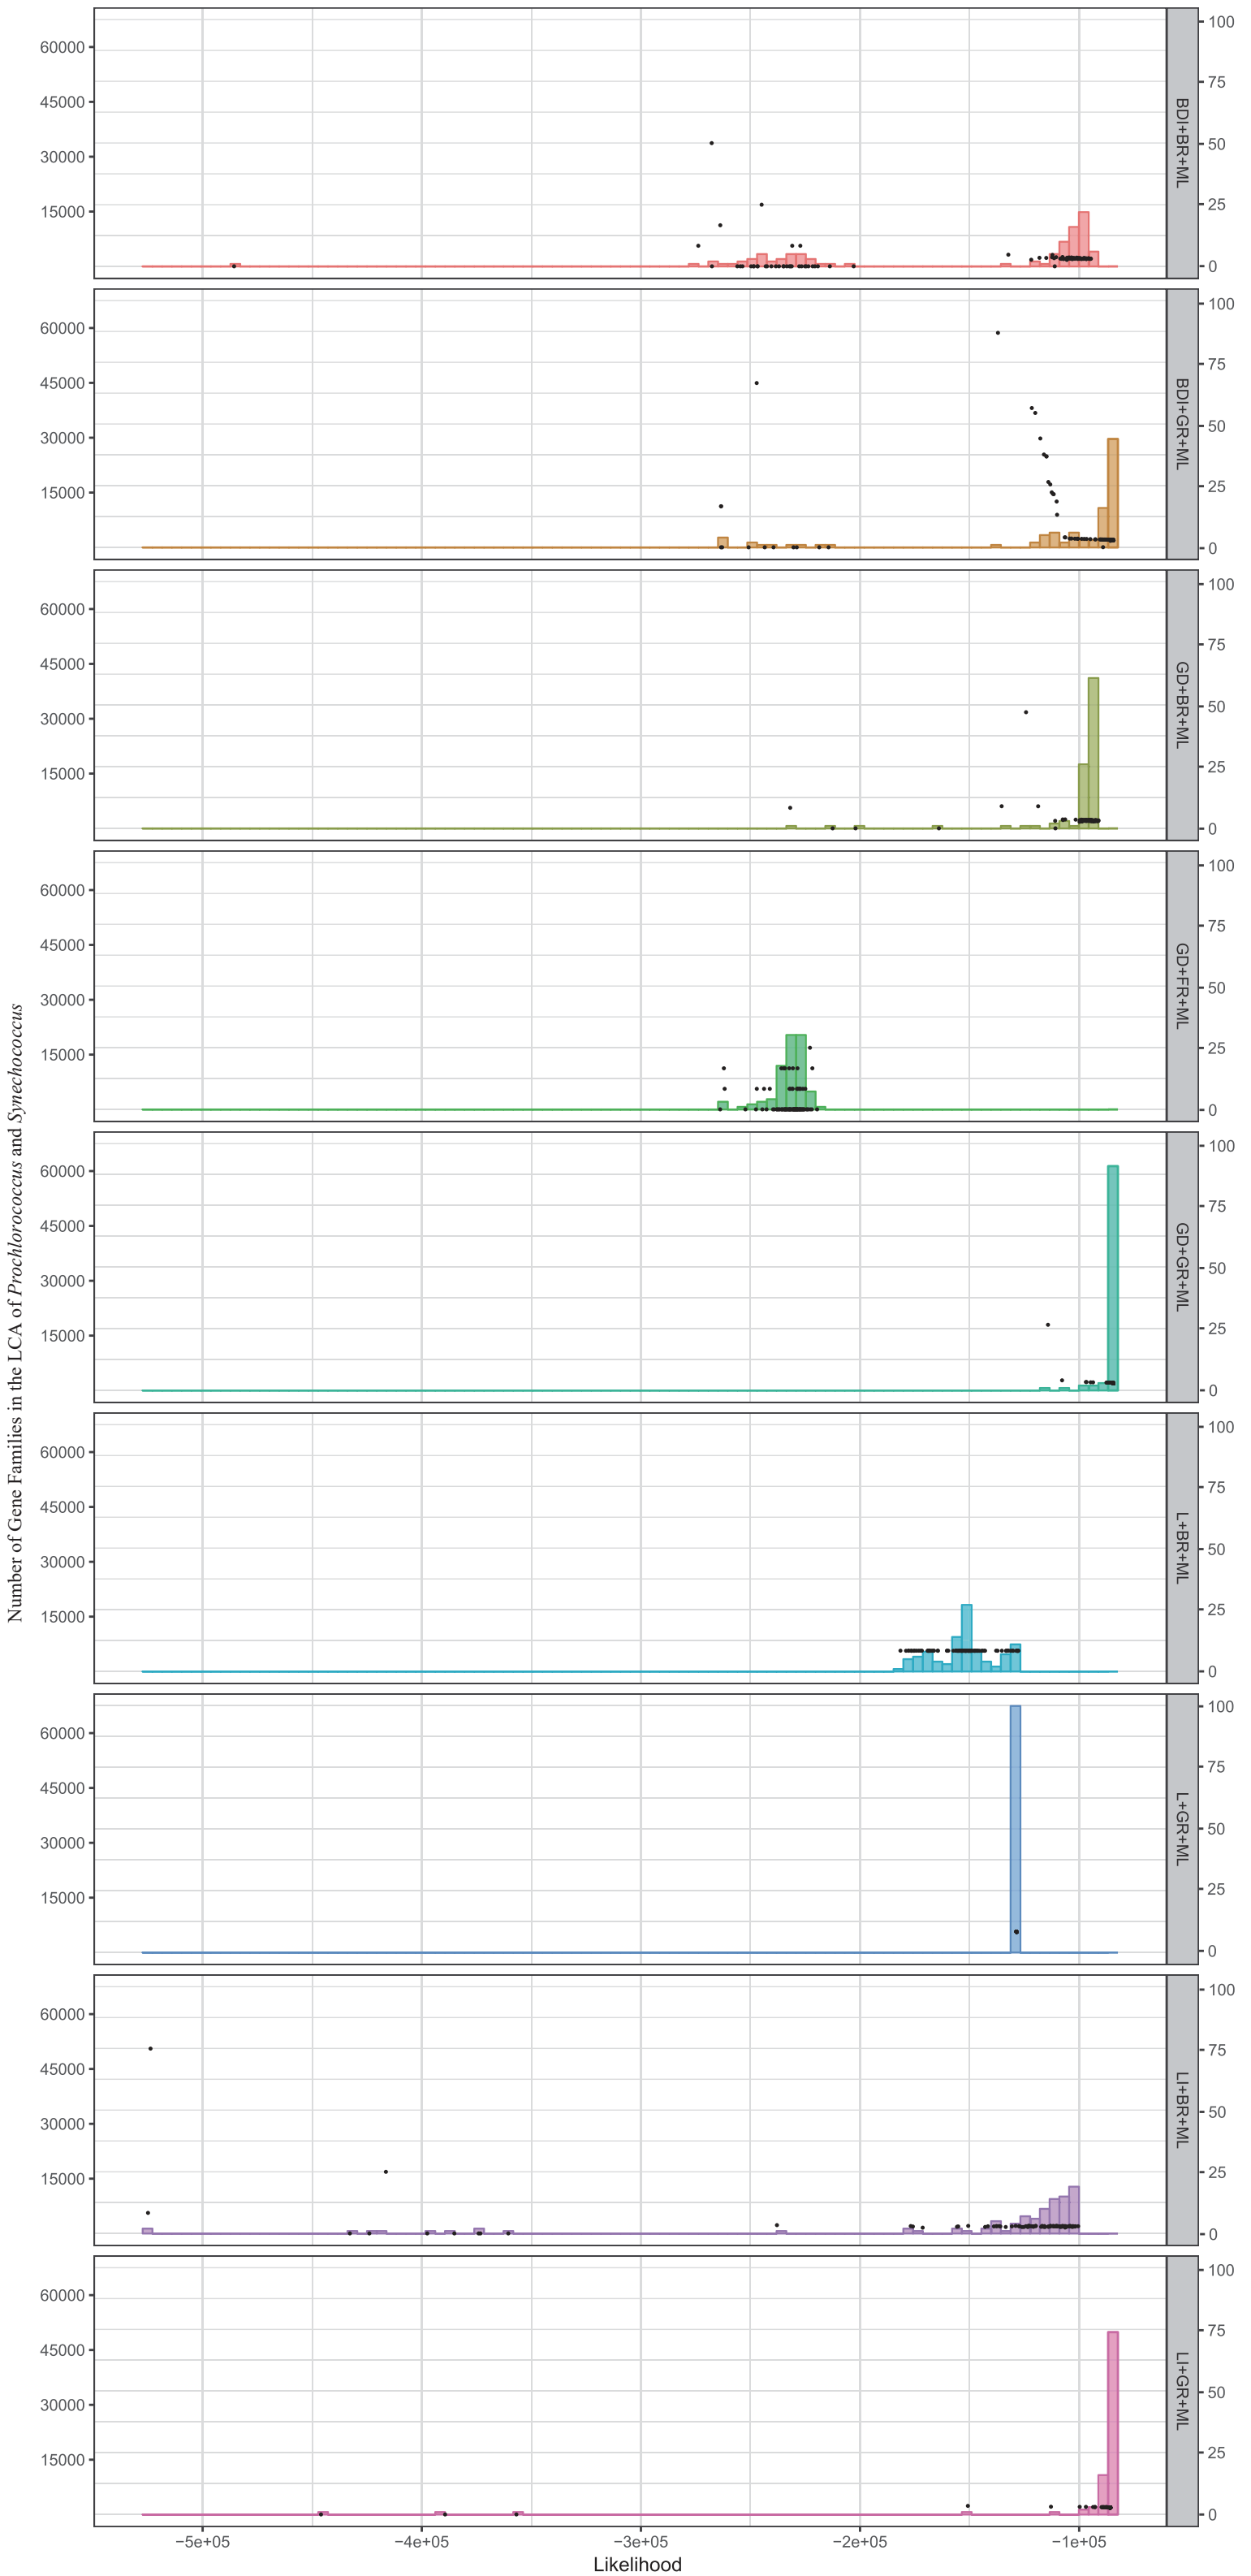

Fig. S8 The histogram distribution of likelihoods derived from 100 replicated analyses under each BadiRate model. Vertical bars represent the frequency of replicates within the same likelihood range (right y-axis). Black dots represent the estimated number of gene families at the root node (i.e., the last common ancestor of *Prochlorococcus* and *Synechococcus*) at a given likelihood (left y-axis). The ancestral reconstruction with the largest likelihood under each BadiRate model is considered for further analyses.

Fig. S9

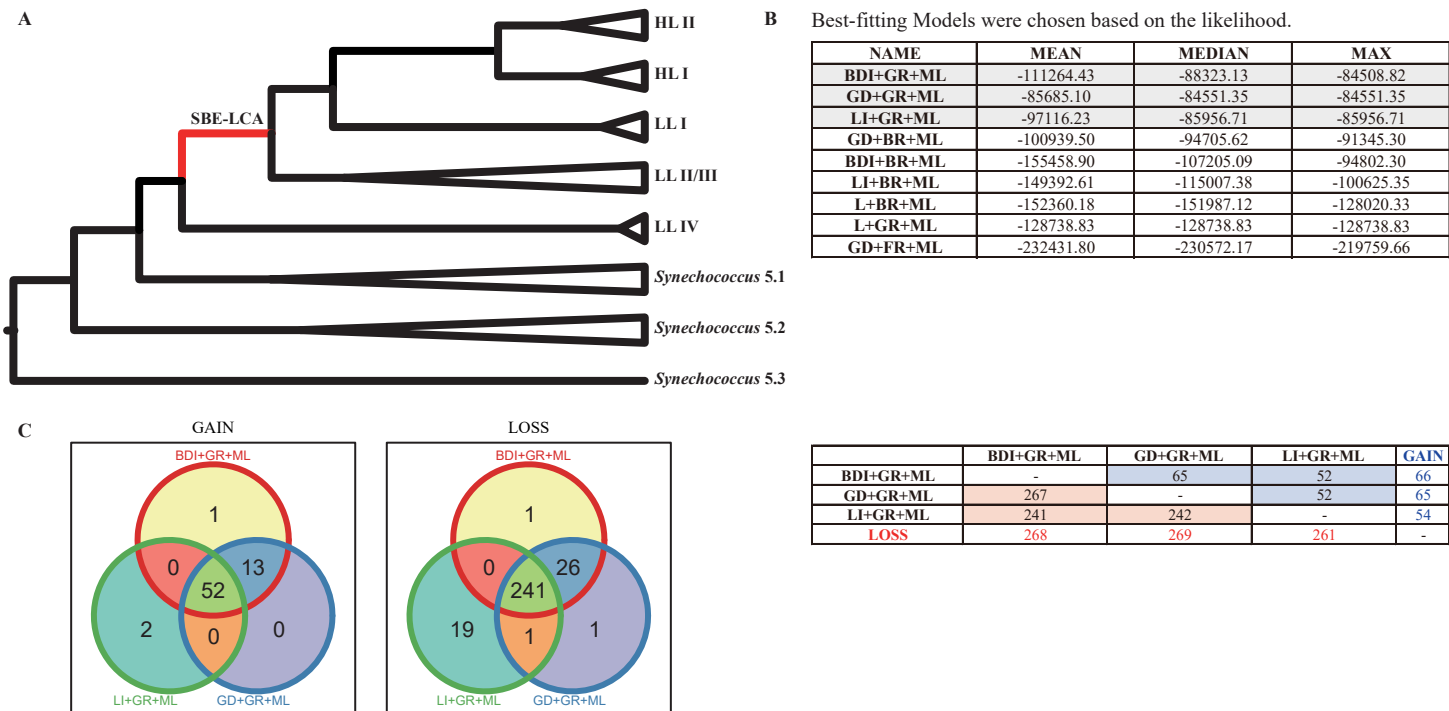

Fig. S9 Comparison of the gene gain and loss events reconstructed by BadiRate with different models during the evolution of *Prochlorococcus*. (A) The diagram highlights the evolutionary stages that led to the ancestral nodes ‘SBE-LCA’ (Fig. 1) of *Prochlorococcus*. (B) Multiple models are implemented in BadiRate for ancestral reconstruction, with the mean, median, and maximum likelihood values of each in 100 replicated analyses are shown. Models with their maximum likelihood values ranking at the top three (shaded in grey) are subject to further analyses. (C) Venn diagrams show the number of gain and loss events, respectively, reconstructed with the three models shown in (B). The detailed statistics are provided in the table on the right, in which the number of gain and loss events that are consistently inferred by distinct models are shaded with blue and pink, respectively. For example, 267 and 65 gene families are consistently inferred to be lost and gained following the model GD+GR+ML and BDI+GR+ML, respectively. The numbers of gain and loss events following each individual model are shown in the rightmost column (blue bold) and in the bottom row (red bold), respectively.

Fig. S10

A

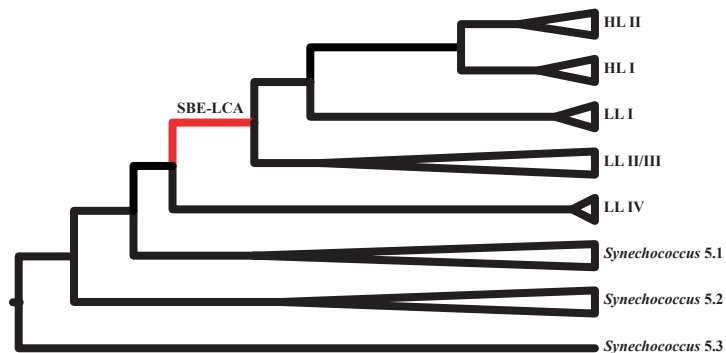

C

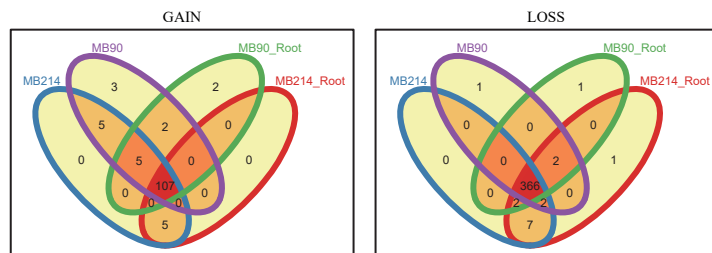

B

| Full Label        | Description                                                                                                                                        |
|-------------------|----------------------------------------------------------------------------------------------------------------------------------------------------|
| <b>MB214</b>      | (1) HGT Time Consistency<br>(2) Ultrametric Tree (MCMCTREE + MrBayes Tree built on the concatenation of 214 gene families + 3 Calibrations Points) |
| <b>MB214-Root</b> | (1) HGT Time Consistency<br>(2) Ultrametric Tree (MCMCTREE + MrBayes Tree built on the concatenation of 214 gene families + 1 Root calibration)    |
| <b>MB90</b>       | (1) HGT Time Consistency<br>(2) Ultrametric Tree (MCMCTREE + MrBayes Tree built on the concatenation of 90 gene families + 3 Calibrations Points)  |
| <b>MB90-Root</b>  | (1) HGT Time Consistency<br>(2) Ultrametric Tree (MCMCTREE + MrBayes Tree built on the concatenation of 90 gene families + 1 Root calibration)     |

|                   | <b>MB214</b> | <b>MB214-Root</b> | <b>MB90</b> | <b>MB90-Root</b> | <b>GAIN</b> |
|-------------------|--------------|-------------------|-------------|------------------|-------------|
| <b>MB214</b>      | -            | 112               | 117         | 112              | <b>122</b>  |
| <b>MB214-Root</b> | 377          | -                 | 107         | 107              | <b>112</b>  |
| <b>MB90</b>       | 368          | 370               | -           | 114              | <b>122</b>  |
| <b>MB90-Root</b>  | 368          | 370               | 368         | -                | <b>116</b>  |
| <b>LOSS</b>       | <b>377</b>   | <b>380</b>        | <b>371</b>  | <b>371</b>       | -           |

Fig. S10 Comparison of the gene gain and loss events reconstructed by AnGST with different strategies during the evolution of *Prochlorococcus*. (A) The diagram highlights the evolutionary stage that led to the ancestral nodes ‘SBE-LCA’ (Fig. 1) of *Prochlorococcus*. (B) For ancestral reconstructions with AnGST, a chronogram is used to limit HGT events occurring between contemporaneous lineages (HGT Time Consistency). Chronograms are estimated with MCMCTree based on 214 gene families or 90 gene families under 3 calibration points or single root calibration. (C) Venn diagrams show the number of gain and loss events, respectively, reconstructed based on different strategies shown in (B). The detailed statistics are provided in the table on the right, in which the number of gain and loss events that are consistently inferred by distinct strategies are shaded with blue and pink, respectively. For example, 377 and 112 gene families are consistently to be lost and gained following the strategy MB214 and MB214-Root, respectively. The numbers of gain and loss events following each individual strategy are shown in the rightmost column (blue bold) and in the bottom row (red bold), respectively.

Fig. S11

A

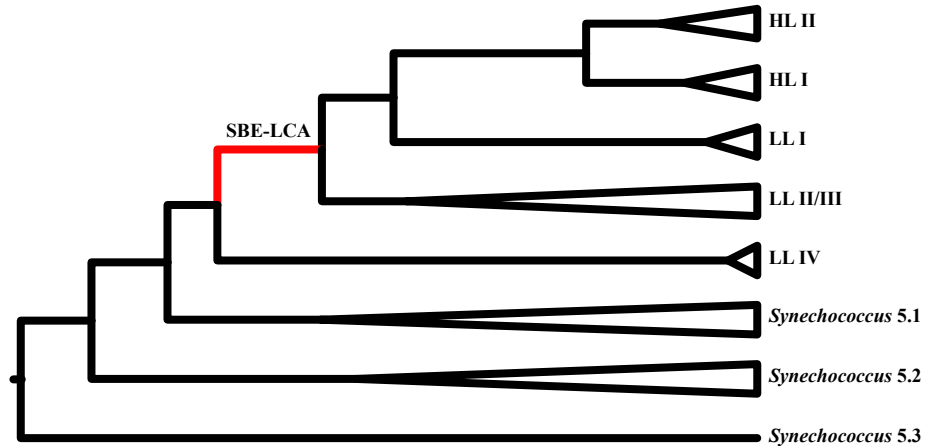

B

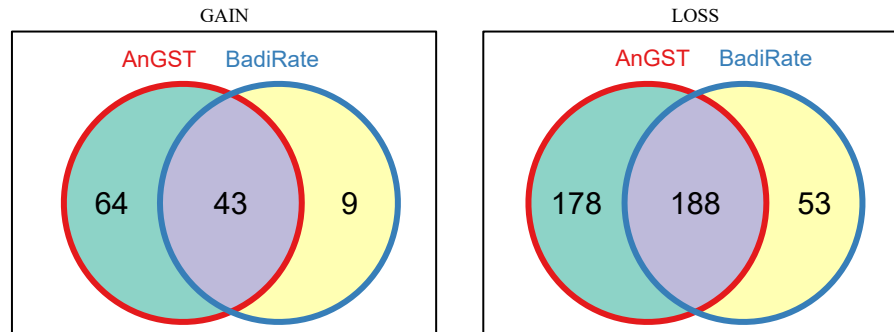

Fig. S11 (A) The diagram highlights the evolutionary stage that led to the ancestral nodes 'SBE-LCA' (Fig. 1) of *Prochlorococcus*. (B) Venn diagrams show the number of gene families consistently predicted to be gained or lost by AnGST and BadiRate during the evolutionary.

**Table S1** A list of fossil calibration sets employed in the present study. Maximum and minimum time constraints are in the unit of billion years ago (Ga). References for calibrations are provided.

|                                                    | Calibration Set  | Cyanobacteria Root    | Total Oxygenic Cyanobacteria | Crown Oxygenic Cyanobacteria   | Total Pleurocapsales     | Total Nostocales | Crown Nostocales         |
|----------------------------------------------------|------------------|-----------------------|------------------------------|--------------------------------|--------------------------|------------------|--------------------------|
| <b>Without Non-oxygenic Cyanobacteria Outgroup</b> | C1 <sup>15</sup> | -                     | -                            | 2.32-2.7 <sup>1,2</sup>        | 1.7-2.45 <sup>3,4</sup>  | -                | 2.1-2.45 <sup>3,5</sup>  |
|                                                    | C2 <sup>16</sup> | -                     | -                            | 2.32-2.7                       | 1.7-1.9 <sup>6,7,9</sup> | -                | 1.6-1.9 <sup>6,7,8</sup> |
|                                                    | C3 <sup>15</sup> | -                     | -                            | 2.32-3.0 <sup>2,10,11,12</sup> | 1.7-2.45                 | -                | 2.1-2.45                 |
|                                                    | C4 <sup>16</sup> | -                     | -                            | 2.32-3.0                       | 1.7-1.9                  | -                | 1.6-1.9                  |
|                                                    | C5 <sup>17</sup> | -                     | -                            | 2.32-3.0                       | 1.7-1.9                  | -                | <2.1 <sup>5</sup>        |
|                                                    | C6 <sup>17</sup> | -                     | -                            | 2.32-2.7                       | 1.7-1.9                  | -                | <2.1                     |
|                                                    | C7               | -                     | -                            | 2.32-2.7                       | -                        | -                | -                        |
|                                                    | C8               | -                     | -                            | 2.32-3.0                       | -                        | -                | -                        |
|                                                    | C9               | -                     | -                            | 2.32-3.0                       | >1.7                     | >1.6             | -                        |
|                                                    | C10              | -                     | -                            | 2.32-3.0                       | >1.7                     | >1.9             | -                        |
|                                                    | C11              | -                     | -                            | 2.32-3.0                       | >1.7                     | >2.1             | -                        |
|                                                    | C12              | -                     | -                            | 2.32-3.0                       | >1.9                     | >1.6             | -                        |
|                                                    | C13              | -                     | -                            | 2.32-3.0                       | >1.9                     | >1.9             | -                        |
|                                                    | C14              | -                     | -                            | 2.32-3.0                       | >1.9                     | >2.1             | -                        |
| <b>With Non-oxygenic Cyanobacteria Outgroup</b>    | C15              | <3.8 <sup>13,14</sup> | >3.0 <sup>10,11,12</sup>     | -                              | >1.7                     | >1.6             | -                        |
|                                                    | C16              | <3.8                  | >3.0                         | -                              | >1.7                     | >1.9             | -                        |
|                                                    | C17              | <3.8                  | >3.0                         | -                              | >1.7                     | >2.1             | -                        |
|                                                    | C18              | <3.8                  | >3.0                         | -                              | >1.9                     | >1.6             | -                        |
|                                                    | C19              | <3.8                  | >3.0                         | -                              | >1.9                     | >1.9             | -                        |
|                                                    | C20              | <3.8                  | >3.0                         | -                              | >1.9                     | >2.1             | -                        |
|                                                    | C21              | <4.0 <sup>13,14</sup> | >3.0                         | -                              | >1.7                     | >1.6             | -                        |
|                                                    | C22              | <4.0                  | >3.0                         | -                              | >1.7                     | >1.9             | -                        |
|                                                    | C23              | <4.0                  | >3.0                         | -                              | >1.7                     | >2.1             | -                        |
|                                                    | C24              | <4.0                  | >3.0                         | -                              | >1.9                     | >1.6             | -                        |
|                                                    | C25              | <4.0                  | >3.0                         | -                              | >1.9                     | >1.9             | -                        |
|                                                    | C26              | <4.0                  | >3.0                         | -                              | >1.9                     | >2.1             | -                        |
|                                                    | C27              | <4.2 <sup>13,14</sup> | >3.0                         | -                              | >1.7                     | >1.6             | -                        |
|                                                    | C28              | <4.2                  | >3.0                         | -                              | >1.7                     | >1.9             | -                        |
|                                                    | C29              | <4.2                  | >3.0                         | -                              | >1.7                     | >2.1             | -                        |
|                                                    | C30              | <4.2                  | >3.0                         | -                              | >1.9                     | >1.6             | -                        |
|                                                    | C31              | <4.2                  | >3.0                         | -                              | >1.9                     | >1.9             | -                        |
|                                                    | C32              | <4.2                  | >3.0                         | -                              | >1.9                     | >2.1             | -                        |
|                                                    | C33              | <4.5 <sup>13,14</sup> | >3.0                         | -                              | >1.7                     | >1.6             | -                        |
|                                                    | C34              | <4.5                  | >3.0                         | -                              | >1.7                     | >1.9             | -                        |
|                                                    | C35              | <4.5                  | >3.0                         | -                              | >1.7                     | >2.1             | -                        |
|                                                    | C36              | <4.5                  | >3.0                         | -                              | >1.9                     | >1.6             | -                        |
|                                                    | C37              | <4.5                  | >3.0                         | -                              | >1.9                     | >1.9             | -                        |
|                                                    | C38              | <4.5                  | >3.0                         | -                              | >1.9                     | >2.1             | -                        |

## Reference

- 1 J. J. Brocks, R. Buick, R. E. Summons, G. A. Logan, A reconstruction of Archean biological diversity based on molecular fossils from the 2.78 to 2.45 billion-year-old Mount Bruce Supergroup, Hamersley Basin, Western Australia. *Geochim Cosmochim Acta* 67, 4321-4335 (2003).
- 2 H. D. Holland, Volcanic gases, black smokers, and the Great Oxidation Event. *Geochim Cosmochim Acta* 66, 3811-3826 (2002).
- 3 C. Blank, P. Sanchez-Baracaldo, Timing of morphological and ecological innovations in the cyanobacteria – a key to understanding the rise in atmospheric oxygen. *Geobiology* 8, 1-23 (2010).
- 4 A. Knoll, S. Golubic, J. Green, K. Swett, Organically preserved microbial endoliths from the late Proterozoic of East Greenland. *Nature* 321, 856 (1986).
- 5 A. Tomitani, A. H. Knoll, C. M. Cavanaugh, T. Ohno, The evolutionary diversification of cyanobacteria: molecular phylogenetic and paleontological perspectives. *Proc Natl Acad Sci USA* 103, 5442-5447 (2006).
- 6 H. Hofmann, Precambrian microflora, Belcher Islands, Canada: significance and systematics. *J Paleontol*, 1040-1073 (1976).
- 7 S. Golubic, L. Seong-Joo, Early cyanobacterial fossil record: preservation, palaeoenvironments and identification. *Eur J Phycol* 34, 339-348 (1999).
- 8 S. Golubic, V. N. Sergeev, A. H. Knoll, Mesoproterozoic Archaeoellipsoides: akinetes of heterocystous cyanobacteria. *Lethaia* 28, 285-298 (1995).
- 9 Y. Zhang, S. Golubic, Endolithic microfossils (cyanophyta) from early Proterozoic stromatolites, Hebei, China. *Acta Micropaleontol. Sin* 4, 1-3 (1987).
- 10 N. J. Planavsky et al., Evidence for oxygenic photosynthesis half a billion years before the Great Oxidation Event. *Nat Geosci* 7, 283 (2014).
- 11 S. A. Crowe et al., Atmospheric oxygenation three billion years ago. *Nature* 501, 535 (2013).
- 12 A. M. Satkoski, N. J. Beukes, W. Li, B. L. Beard, C. M. Johnson, A redox-stratified ocean 3.2 billion years ago. *Earth Planet Sci Lett* 430, 43-53 (2015).
- 13 Nisbet, E. G. & Sleep, N. H. The habitat and nature of early life. *Nature* 409, 1083-1091, doi:10.1038/35059210 (2001).
- 14 Sleep, N. H., Zahnle, K. J., Kasting, J. F. & Morowitz, H. J. Annihilation of ecosystems by large asteroid impacts on the early Earth. *Nature* 342, 139-142, doi:10.1038/342139a0 (1989).
- 15 P. Sánchez-Baracaldo, A. Ridgwell, J. A. Raven, A neoproterozoic transition in the marine nitrogen cycle. *Current Biology* 24, 652-657 (2014).
- 16 P. Sánchez-Baracaldo, J. A. Raven, D. Pisani, A. H. Knoll, Early photosynthetic eukaryotes inhabited low-salinity habitats. *Proc Natl Acad Sci USA*, 201620089 (2017).
- 17 P. Sánchez-Baracaldo, Origin of marine planktonic cyanobacteria. *Sci Rep* 5, 17418 (2015).



Table S2 Genomic properties of 317 cyanobacteria downloaded from the NCBI public database, among which the 159 high-quality reference or representative genomes are shaded.

| Organism                                              | Taxonomy ID | Genome Size | G+C%  | Completeness (Contamination) | RefSeq Category       | Assembly Level  | Ecotype           |
|-------------------------------------------------------|-------------|-------------|-------|------------------------------|-----------------------|-----------------|-------------------|
| Prochlorococcus marinus str. AS9601                   | 146891      | 1.67        | 31.32 | 99.64                        | representative genome | Complete genome | HLII              |
| Prochlorococcus marinus str. MED4                     | 59919       | 1.66        | 30.8  | 99.46                        | representative genome | Complete genome | HLII              |
| Prochlorococcus marinus str. MIT_9107                 | 59921       | 1.7         | 31.02 | 99.46                        | representative genome | Contig          | HLII              |
| Prochlorococcus marinus str. MIT_9201                 | 93057       | 1.67        | 31.28 | 100                          | representative genome | Contig          | HLII              |
| Prochlorococcus marinus str. MIT_9301                 | 167546      | 1.64        | 31.34 | 99.46                        | representative genome | Complete genome | HLII              |
| Prochlorococcus marinus str. MIT_9303                 | 59922       | 2.68        | 50.01 | 99.73                        | reference genome      | Complete genome | HLIV              |
| Prochlorococcus marinus str. MIT_9312                 | 74546       | 1.71        | 31.21 | 99.73                        | representative genome | Complete genome | HLII              |
| Prochlorococcus marinus str. MIT_9313                 | 74547       | 2.41        | 50.74 | 99.18                        | representative genome | Complete genome | HLIV              |
| Prochlorococcus marinus str. MIT_9515                 | 167542      | 1.7         | 30.79 | 100                          | representative genome | Complete genome | HLI               |
| Prochlorococcus marinus str. NATL2A                   | 59920       | 1.84        | 35.12 | 98.64                        | representative genome | Complete genome | LLI               |
| Prochlorococcus marinus str. SS120                    | 167539      | 1.75        | 36.44 | 100                          | reference genome      | Complete genome | LLII/III          |
| Prochlorococcus sp. MIT_0601                          | 1499498     | 1.71        | 37.02 | 99.73                        | representative genome | Contig          | LLII/III          |
| Prochlorococcus sp. MIT_0603                          | 1499500     | 1.75        | 36.35 | 100                          | representative genome | Contig          | LLII/III          |
| Synechococcus sp. CC9311                              | 64471       | 2.61        | 52.45 | 99.73                        | representative genome | Complete genome | Synechococcus_5.1 |
| Synechococcus sp. CC9902                              | 316279      | 2.23        | 54.16 | 99.46                        | representative genome | Complete genome | Synechococcus_5.1 |
| Synechococcus sp. KORDI-100                           | 1280380     | 2.79        | 57.5  | 99.46                        | representative genome | Complete genome | Synechococcus_5.1 |
| Synechococcus sp. KORDI-49                            | 585423      | 2.59        | 61.37 | 99.37                        | representative genome | Complete genome | Synechococcus_5.1 |
| Synechococcus sp. KORDI-52                            | 585425      | 2.57        | 59.09 | 100                          | representative genome | Complete genome | Synechococcus_5.1 |
| Synechococcus sp. RS9916                              | 221359      | 2.66        | 59.8  | 99.73                        | representative genome | Complete genome | Synechococcus_5.1 |
| Synechococcus sp. WH_7803                             | 32051       | 2.37        | 60.24 | 99.18                        | representative genome | Complete genome | Synechococcus_5.1 |
| Synechococcus sp. WH_8102                             | 84588       | 2.43        | 59.41 | 99.46                        | representative genome | Complete genome | Synechococcus_5.1 |
| Prochlorococcus marinus str. EQPAC1                   | 190047      | 1.65        | 30.79 | 99.46                        | na                    | Contig          | HLI               |
| Prochlorococcus marinus str. GP2                      | 59925       | 1.62        | 31.16 | 99.46                        | na                    | Contig          | HLII              |
| Prochlorococcus marinus str. LG                       | 167556      | 1.75        | 36.43 | 99.86                        | na                    | Contig          | LLII/III          |
| Prochlorococcus marinus str. MIT_9116                 | 167544      | 1.69        | 31.01 | 99.18                        | na                    | Contig          | HLII              |
| Prochlorococcus marinus str. MIT_9123                 | 167545      | 1.7         | 31.02 | 99.18                        | na                    | Contig          | HLII              |
| Prochlorococcus marinus str. MIT_9202                 | 93058       | 1.69        | 31.08 | 98.78                        | na                    | Contig          | HLII              |
| Prochlorococcus marinus str. MIT_9215                 | 93059       | 1.69        | 38.01 | 99.73                        | na                    | Contig          | HLII              |
| Prochlorococcus marinus str. MIT_9311                 | 93060       | 1.74        | 31.15 | 99.73                        | na                    | Chromosome      | LLII/III          |
| Prochlorococcus marinus str. MIT_9302                 | 74545       | 1.75        | 31.12 | 99.18                        | na                    | Complete genome | HLII              |
| Prochlorococcus marinus str. MIT_9311                 | 167547      | 1.71        | 31.21 | 99.73                        | na                    | Contig          | HLII              |
| Prochlorococcus marinus str. MIT_9314                 | 167548      | 1.69        | 31.18 | 99.73                        | na                    | Contig          | HLII              |
| Prochlorococcus marinus str. MIT_9321                 | 167549      | 1.66        | 31.2  | 99.73                        | na                    | Contig          | HLII              |
| Prochlorococcus marinus str. MIT_9322                 | 167550      | 1.66        | 31.21 | 99.73                        | na                    | Contig          | HLII              |
| Prochlorococcus marinus str. MIT_9401                 | 167551      | 1.67        | 31.21 | 99.73                        | na                    | Contig          | HLII              |
| Prochlorococcus marinus str. NATL1A                   | 167555      | 1.86        | 34.98 | 98.91                        | na                    | Complete genome | LLI               |
| Prochlorococcus marinus str. PAC1                     | 59924       | 1.84        | 35.09 | 99.18                        | na                    | Contig          | LLI               |
| Prochlorococcus marinus str. SB                       | 59926       | 1.67        | 31.5  | 99.91                        | na                    | Contig          | HLII              |
| Prochlorococcus marinus str. SS2                      | 167552      | 1.75        | 36.44 | 100                          | na                    | Contig          | LLII/III          |
| Prochlorococcus marinus str. SS23                     | 167553      | 1.75        | 36.44 | 99.86                        | na                    | Contig          | LLII/III          |
| Prochlorococcus marinus str. SS51                     | 167554      | 1.75        | 36.43 | 100                          | na                    | Contig          | LLII/III          |
| Prochlorococcus sp. MIT_0602                          | 1499499     | 1.75        | 36.34 | 100                          | na                    | Contig          | LLII/III          |
| Prochlorococcus sp. MIT_0604                          | 1501268     | 1.78        | 31.17 | 99.73                        | na                    | Complete genome | HLII              |
| Prochlorococcus sp. MIT_0701                          | 1499502     | 2.59        | 50.6  | 99.73                        | na                    | Contig          | LLIV              |
| Prochlorococcus sp. MIT_0702                          | 1499503     | 2.58        | 50.6  | 99.73                        | na                    | Contig          | LLIV              |
| Prochlorococcus sp. MIT_0703                          | 1499504     | 2.58        | 50.61 | 99.59                        | na                    | Contig          | LLI               |
| Prochlorococcus sp. MIT_0801                          | 1501269     | 1.93        | 34.91 | 99.18                        | na                    | Complete genome | LLI               |
| Prochlorococcus sp. SS52                              | 1499501     | 1.75        | 36.44 | 99.86                        | na                    | Contig          | LLII/III          |
| Synechococcus sp. BL107                               | 313625      | 2.29        | 54.2  | 99.46                        | na                    | Contig          | Synechococcus_5.1 |
| Synechococcus sp. CC9605                              | 110662      | 2.51        | 59.22 | 99.73                        | na                    | Complete genome | Synechococcus_5.1 |
| Synechococcus sp. CC9616                              | 110663      | 2.65        | 56.52 | 99.46                        | na                    | Complete genome | Synechococcus_5.1 |
| Synechococcus sp. WH_7805                             | 59931       | 2.63        | 57.49 | 99.73                        | na                    | Complete genome | Synechococcus_5.1 |
| Synechococcus sp. WH_8016                             | 166318      | 2.69        | 54.09 | 99.18                        | na                    | Complete genome | Synechococcus_5.1 |
| Synechococcus sp. WH_8109                             | 166314      | 2.11        | 60.09 | 99.46                        | na                    | Complete genome | Synechococcus_5.1 |
| Acaryochloris marina MBIC11017                        | 329726      | 8.36        | 46.96 | 99.53                        | representative genome | Complete genome | -                 |
| Aliterella atlantica CENA595                          | 1618023     | 5.27        | 42.6  | 94.22                        | representative genome | Contig          | -                 |
| Anabaena cylindrica PCC_7122                          | 272123      | 7.06        | 38.79 | 99.44                        | representative genome | Complete genome | -                 |
| Anabaena sp. 90                                       | 46234       | 5.31        | 38.1  | 99.67                        | representative genome | Complete genome | -                 |
| Anabaena sp. PCC_7108                                 | 163908      | 5.89        | 38.77 | 99.63                        | representative genome | Complete genome | -                 |
| Aphanizomenon flos-aquae NIES-81                      | 284502      | 5.85        | 37.37 | 99.44                        | representative genome | Complete genome | -                 |
| Arthrospira platensis NIES-39                         | 696747      | 6.79        | 43.65 | 99.13                        | representative genome | Chromosome      | -                 |
| Calothrix sp. 336_3                                   | 1337936     | 6.42        | 41.1  | 100                          | representative genome | Complete genome | -                 |
| Calothrix sp. PCC_6303                                | 1170562     | 6.96        | 39.8  | 99.76                        | representative genome | Complete genome | -                 |
| Calothrix sp. PCC_7103                                | 32057       | 11.58       | 38.55 | 99.39                        | representative genome | Complete genome | -                 |
| Calothrix sp. PCC_7507                                | 99598       | 7.02        | 42.29 | 99.11                        | representative genome | Complete genome | -                 |
| Candidatus Atelocyanobacterium thalassa isolate ALOHA | 1451329     | 1.44        | 31.12 | 73.92                        | representative genome | Complete genome | -                 |
| Candidatus Synechococcus spongiformis SH4             | 1453453     | 1.66        | 63.05 | 83.83                        | representative genome | Contig          | -                 |
| Chlorococoides fritschii PCC_6912                     | 211165      | 7.75        | 41.48 | 99.64                        | representative genome | Contig          | -                 |
| Chroococcoides thermalis PCC_7203                     | 251229      | 6.69        | 44.47 | 99.63                        | representative genome | Complete genome | -                 |
| Chroococcoides siderophila 5-2 s-c-1                  | 247279      | 5.01        | 42.88 | 99.78                        | representative genome | Contig          | -                 |
| Coleofasciculus chthonophiles PCC_7420                | 118168      | 8.68        | 45.29 | 98.93                        | representative genome | Complete genome | -                 |
| Criinalium epissammium PCC_9333                       | 1173022     | 5.62        | 40.16 | 99.48                        | representative genome | Complete genome | -                 |
| Crocospira watsonii WH_8301                           | 165597      | 6.24        | 37.11 | 99.74                        | representative genome | Complete genome | -                 |
| Cyanobacterium apominum PCC_10605                     | 755178      | 4.18        | 34.93 | 99.45                        | representative genome | Complete genome | -                 |
| Cyanobium gracile PCC_6307                            | 292564      | 3.34        | 68.71 | 99.73                        | representative genome | Complete genome | -                 |
| Cyanobium sp. ATCC_51142                              | 180281      | 2.83        | 68.71 | 99.46                        | representative genome | Complete genome | -                 |
| Cyanothecce sp. PCC_7424                              | 43989       | 5.46        | 37.94 | 99.96                        | representative genome | Complete genome | -                 |
| Cyanothecce sp. PCC_7425                              | 63393       | 6.55        | 38.51 | 99.71                        | representative genome | Complete genome | -                 |
| Cyanothecce sp. PCC_7822                              | 395961      | 5.79        | 50.65 | 99.29                        | representative genome | Complete genome | -                 |
| Cyanothecce sp. PCC_8801                              | 497965      | 7.84        | 39.9  | 99.82                        | representative genome | Complete genome | -                 |
| Cylindrospermum stagnale PCC_7417                     | 41431       | 4.79        | 39.76 | 99.56                        | representative genome | Complete genome | -                 |
| Dactylococcopsis salina PCC_8305                      | 56107       | 7.61        | 42.2  | 99.78                        | representative genome | Chromosome      | -                 |
| Dolichospermum circinale AWQC310F                     | 13035       | 3.78        | 42.44 | 99.55                        | representative genome | Complete genome | -                 |
| Fischerella sp. PCC_9605                              | 553470      | 4.41        | 37.33 | 99.56                        | representative genome | Complete genome | -                 |
| Fischerella thermalis PCC_7521                        | 1173024     | 8.08        | 42.6  | 100                          | representative genome | Complete genome | -                 |
| Fortia contorta PCC_7126                              | 98439       | 5.44        | 41.02 | 99.76                        | representative genome | Contig          | -                 |
| Geitlerinema sp. PCC_7407                             | 643473      | 5.74        | 42.2  | 99.56                        | representative genome | Complete genome | -                 |
| Geminocystis herdmanii PCC_6308                       | 1173025     | 4.68        | 58.46 | 99.87                        | representative genome | Complete genome | -                 |
| Gloeobacter kiliuensis JS1                            | 113355      | 4.26        | 34.28 | 99.78                        | representative genome | Chromosome      | -                 |
| Gloeobacter violaceus PCC_7421                        | 1183438     | 4.72        | 60.54 | 98.29                        | representative genome | Complete genome | -                 |
| Gloeocapsa sp. PCC_73106                              | 251221      | 4.66        | 62    | 99.15                        | reference genome      | Complete genome | -                 |
| Halothece sp. PCC_7418                                | 102232      | 4.03        | 41.11 | 98.84                        | representative genome | Contig          | -                 |
| Kamptomena formosum PCC_6407                          | 65093       | 4.18        | 42.92 | 99.48                        | representative genome | Complete genome | -                 |
| Leptolyngbya boryana PCC_6306                         | 402777      | 6.89        | 43.37 | 99.56                        | representative genome | Complete genome | -                 |
| Leptolyngbya sp. Heron Island J                       | 272134      | 7.26        | 47.01 | 99.41                        | representative genome | Complete genome | -                 |
| Leptolyngbya sp. JSC-1                                | 1385935     | 8.06        | 48.05 | 98.64                        | representative genome | Contig          | -                 |
| Leptolyngbya sp. KIOST-1                              | 1487953     | 7.87        | 48.86 | 99.53                        | representative genome | Complete genome | -                 |
| Leptolyngbya sp. PCC_6406                             | 1229172     | 6.32        | 59.44 | 99.18                        | representative genome | Contig          | -                 |
| Leptolyngbya sp. PCC_7375                             | 1173264     | 5.78        | 55.11 | 98.64                        | representative genome | Complete genome | -                 |
| Leptolyngbya sp. PCC_7376                             | 102129      | 9.42        | 47.62 | 99.73                        | representative genome | Complete genome | -                 |
| Leptolyngbya valderiana BDU_20041                     | 111781      | 5.13        | 43.87 | 99.42                        | representative genome | Complete genome | -                 |
| Lynghya aestuarii BL_J                                | 322866      | 6.99        | 59.77 | 87.93                        | representative genome | Contig          | -                 |
| Lynghya confervoides BDU141951                        | 1348334     | 6.87        | 41.16 | 99.74                        | representative genome | Contig          | -                 |
| Mastigocladus repens PCC_10914                        | 1574623     | 8.8         | 49.67 | 99.34                        | representative genome | Complete genome | -                 |
| Mastigocladus laminosus UUT74                         | 221288      | 6.47        | 43.52 | 99.76                        | representative genome | Complete genome | -                 |
| Mastigococcus testarum BC008                          | 1594576     | 8.56        | 37.59 | 74.6                         | representative genome | Complete genome | -                 |
| Microcoleus sp. PCC_7113                              | 371196      | 12.7        | 37.28 | 99.04                        | representative genome | Contig          | -                 |
| Microcystis aeruginosa NIES-843                       | 1173027     | 7.97        | 46.21 | 99.56                        | representative genome | Complete genome | -                 |
| Moorea produens JHB                                   | 494447      | 5.84        | 42.33 | 99.89                        | representative genome | Complete genome | -                 |
| Myxosarcina sp. GI1                                   | 1454205     | 9.38        | 43.55 | 99                           | representative genome | Chromosome      | -                 |
| Neosynechococcus sphagnicola sy1 CAUP_A_1101          | 1541065     | 7.07        | 40.1  | 99.56                        | representative genome | Contig          | -                 |
| Nodosolina nodulosa PCC_7104                          | 1497020     | 4.33        | 51.59 | 96.7                         | representative genome | Complete genome | -                 |
| Nodularia spumigena CCY9414                           | 118166      | 6.89        | 57.64 | 99.18                        | representative genome | Complete genome | -                 |
| Nostoc azolae 0708                                    | 313624      | 5.46        | 41.19 | 99.76                        | representative genome | Chromosome      | -                 |
| Nostoc punctiforme PCC_73102 ATCC_29133               | 551115      | 5.49        | 38.37 | 98.89                        | representative genome | Complete genome | -                 |
| Nostoc sp. PCC_7107                                   | 63373       | 9.06        | 41.35 | 99.56                        | representative genome | Complete genome | -                 |
| Nostoc sp. PCC_7120                                   | 317936      | 6.33        | 40.36 | 99.26                        | representative genome | Complete genome | -                 |
| Nostoc sp. PCC_7524                                   | 103690      | 7.21        | 41.27 | 99.19                        | representative genome | Complete genome | -                 |
| Oscillatoria acuminata PCC_6304                       | 28072       | 6.72        | 41.53 | 99.33                        | representative genome | Complete genome | -                 |
| Oscillatoria nigro-viridis PCC_7112                   | 56110       | 7.8         | 47.61 | 99.71                        | representative genome | Complete genome | -                 |
| Oscillatoria sp. PCC_10802                            | 179408      | 8.29        | 45.78 | 99.78                        | representative genome | Complete genome | -                 |
| Planktothrix agardhii NIVA-CYA_126_8                  | 1173028     | 8.57        | 53.94 | 100                          | representative genome | Complete genome | -                 |
| Pleurocapsa sp. PCC_7319                              | 1705388     | 7.07        | 43.4  | 100                          | representative genome | Complete genome | -                 |
| Pleurocapsa sp. PCC_7327                              | 388467      | 5.05        | 39.57 | 100                          | representative genome | Chromosome      | -                 |
| Pseudanabaena holmiana PCC_9006                       | 118161      | 7.39        | 38.73 | 99.56                        | representative genome | Complete genome | -                 |
| Pseudanabaena sp. PCC_6802                            | 118163      | 4.99        | 45.19 | 99.49                        | representative genome | Complete genome | -                 |
| Pseudanabaena sp. PCC_7367                            | 317619      | 5.65        | 37.69 | 99.18                        | representative genome | Complete genome | -                 |
| Raphidopsis brookii D9                                | 927668      | 5.48        | 43.18 | 99.29                        | representative genome | Complete genome | -                 |
| Richestia intracellularis HI101                       | 118173      | 5.62        | 47.81 | 99.76                        | representative genome | Complete genome | -                 |
| Rivularia sp. PCC_7116                                | 82654       | 4.89        | 46.22 | 98.23                        | representative genome | Complete genome | -                 |
| Rubidobacter liformis KORDI_51-2                      | 533247      | 3.19        | 40.06 | 99.37                        | representative genome | Contig          | -                 |
| Scytonema hofmannii UTEX_2349                         | 1165094     | 3.24        | 33.71 | 93.44                        | representative genome | Contig          | -                 |
| Scytonema tolyporthoides VB-61278                     | 373994      | 8.73        | 37.53 | 99.78                        | representative genome | Complete genome | -                 |
| Staurieria cyanosphaera PCC_7437                      | 582515      | 8.15        | 56.22 | 99.7                         | representative genome | Complete genome | -                 |
| Synechococcus elongatus PCC_6301                      | 1469607     | 4.13        | 41.14 | 99.76                        | representative genome | Complete genome | -                 |
| Synechococcus sp. CB0101                              | 1232331     | 7.89        | 42.33 | 100                          | representative genome | Complete genome | -                 |
| Synechococcus sp. CB0205                              | 111780      | 5.54        | 36.22 | 99.56                        | representative genome | Complete genome | -                 |
| Synechococcus sp. GFB01                               | 269084      | 2.7         | 55.48 | 99.73                        | representative genome | Complete genome | -                 |
| Synechococcus sp. JA-2-3B a-2-13                      | 232348      | 2.69        | 64.21 | 99.73                        | representative genome | Contig          | -                 |
| Synechococcus sp. JA-3-3Ab                            | 232363      | 2.43        | 62.97 | 99.18                        | representative genome | Contig          | -                 |
| Synechococcus sp. NKBG15041c                          | 1662190     | 2.34        | 67.77 | 84.81                        | representative genome | Contig          | -                 |
| Synechococcus sp. PCC_6312                            | 321332      | 3.05        | 58.45 | 100                          | representative genome | Complete genome | -                 |
| Synechococcus sp. PCC_7002 ATCC_27264                 | 321327      | 2.93        | 60.24 | 100                          | representative genome | Complete genome | -                 |
| Synechococcus sp. PCC_7335                            | 1407650     | 3.18        | 49.25 | 99.45                        | representative genome | Complete genome | -                 |
| Synechococcus sp. PCC_7336                            | 195253      | 3.72        | 48.5  | 99.29                        | representative genome | Complete genome | -                 |
| Synechococcus sp. PCC_7502                            | 32049       | 3.41        | 49.19 | 100                          | representative genome | Complete genome | -                 |
| Synechococcus sp. PCC_7502                            | 91464</     |             |       |                              |                       |                 |                   |



Table S3 A list of the 27 genes used for the relaxed molecular clock analyses.

| ID*     | Name  | Description                                                                                            |
|---------|-------|--------------------------------------------------------------------------------------------------------|
| 23S     | LSU   | 23S ribosomal RNA                                                                                      |
| 16S     | SSU   | 16S ribosomal RNA                                                                                      |
| COG0049 | RpsG  | Ribosomal protein S7 [Translation, ribosomal structure and biogenesis].                                |
| COG0050 | TufB  | Translation elongation factor EF-Tu, a GTPase [Translation, ribosomal structure and biogenesis].       |
| COG0052 | RpsB  | Ribosomal protein S2 [Translation, ribosomal structure and biogenesis].                                |
| COG0080 | RplK  | Ribosomal protein L11 [Translation, ribosomal structure and biogenesis].                               |
| COG0081 | RplA  | Ribosomal protein L1 [Translation, ribosomal structure and biogenesis].                                |
| COG0085 | RpoB  | DNA-directed RNA polymerase, beta subunit/140 kD subunit [Transcription].                              |
| -       | RpoC1 | DNA-directed RNA polymerase, gamma subunit/160 kD subunit [Transcription].                             |
| COG0086 | RpoC2 | DNA-directed RNA polymerase, beta' subunit/160 kD subunit [Transcription].                             |
| COG0087 | RplC  | Ribosomal protein L3 [Translation, ribosomal structure and biogenesis].                                |
| COG0090 | RplB  | Ribosomal protein L2 [Translation, ribosomal structure and biogenesis].                                |
| COG0092 | RpsC  | Ribosomal protein S3 [Translation, ribosomal structure and biogenesis].                                |
| COG0094 | RplE  | Ribosomal protein L5 [Translation, ribosomal structure and biogenesis].                                |
| COG0097 | RplF  | Ribosomal protein L6P/L9E [Translation, ribosomal structure and biogenesis].                           |
| COG0098 | RpsE  | Ribosomal protein S5 [Translation, ribosomal structure and biogenesis].                                |
| COG0100 | RpsK  | Ribosomal protein S11 [Translation, ribosomal structure and biogenesis].                               |
| COG0102 | RplM  | Ribosomal protein L13 [Translation, ribosomal structure and biogenesis].                               |
| COG0103 | RpsI  | Ribosomal protein S9 [Translation, ribosomal structure and biogenesis].                                |
| COG0197 | RplP  | Ribosomal protein L16/L10AE [Translation, ribosomal structure and biogenesis].                         |
| COG0201 | SecY  | Preprotein translocase subunit SecY [Intracellular trafficking, secretion, and vesicular transport].   |
| COG0202 | RpoA  | DNA-directed RNA polymerase, alpha subunit/40 kD subunit [Transcription].                              |
| COG0250 | NusG  | Transcription antitermination factor NusG [Transcription].                                             |
| COG0480 | FusA  | Translation elongation factor EF-G, a GTPase [Translation, ribosomal structure and biogenesis].        |
| COG0522 | RpsD  | Ribosomal protein S4 or related protein [Translation, ribosomal structure and biogenesis].             |
| COG0533 | TsaD  | tRNA A37 threonylcarbamoyltransferase TsaD [Translation, ribosomal structure and biogenesis].          |
| COG0592 | DnaN  | DNA polymerase III sliding clamp (beta) subunit, PCNA homolog [Replication, recombination and repair]. |

\* The 25 core gene families were identified in (Battistuzzi and Hedges 2008). The translation initiation factor IF-2 family (PRK05306) is not recorded in COG and was not included in our analysis. Instead, the DNA-directed RNA polymerase, gamma subunit (*RpoC1*) was added. *RpoC1* was used as one of the highly-conserved core genes in (Sánchez-Baracaldo et al. 2014) to date the rise of marine picocyanobacteria and planktonic N<sub>2</sub>-fixers.

## Reference

- Battistuzzi FU, Hedges SB (2008). A major clade of prokaryotes with ancient adaptations to life on land. *Mol Biol Evol* **26**: 335-343.
- Sánchez-Baracaldo P, Ridgwell A, Raven JA (2014). A neoproterozoic transition in the marine nitrogen cycle. *Current Biology* **24**: 652-657.

Table S4 A list of the single-copy orthologous gene families used for phylogenomic construction. Among the 214 families, 90 (marked with asterisks) each show composition homogeneity in the protein sequences. The Clusters of Orthologous Groups (COGs) annotation is also provided.

| Family ID | COG ID  | Gene    | Description                                                                                                                                                                        |
|-----------|---------|---------|------------------------------------------------------------------------------------------------------------------------------------------------------------------------------------|
| OG3691    | COG0772 | FtsW    | Bacterial cell division protein FtsW, lipid II flippase [Cell cycle control, cell division, chromosome partitioning].                                                              |
| OG4449*   | COG0206 | FtsZ    | Cell division GTPase FtsZ [Cell cycle control, cell division, chromosome partitioning].                                                                                            |
| OG2545    | COG0771 | MurD    | UDP-N-acetylmuramoylalanine-D-glutamate ligase [Cell wall/membrane/envelope biogenesis].                                                                                           |
| OG2602    | COG1207 | GlmU    | Bifunctional protein GlmU, N-acetylglucosamine-1-phosphate-uridylyltransferase/glucosamine-1-phosphate-acetyltransferase [Cell wall/membrane/envelope biogenesis].                 |
| OG3799    | COG0438 | RfaB    | Glycosyltransferase involved in cell wall biosynthesis [Cell wall/membrane/envelope biogenesis].                                                                                   |
| OG4486    | COG0438 | RfaB    | Glycosyltransferase involved in cell wall biosynthesis [Cell wall/membrane/envelope biogenesis].                                                                                   |
| OG5750    | COG0451 | WcaG    | Nucleoside-diphosphate-sugar epimerase [Cell wall/membrane/envelope biogenesis].                                                                                                   |
| OG7226    | COG0812 | MurB    | UDP-N-acetylenolpyruvoylglucosamine reductase [Cell wall/membrane/envelope biogenesis].                                                                                            |
| OG8607    | COG0084 | TatD    | Tat protein secretion system quality control protein TatD (DNase activity) [Cell motility].                                                                                        |
| OG425*    | COG0542 | ClpA    | ATP-dependent Clp protease ATP-binding subunit ClpA [Posttranslational modification, protein turnover, chaperones].                                                                |
| OG1182*   | COG0443 | DnaK    | Molecular chaperone DnaK (HSP70) [Posttranslational modification, protein turnover, chaperones].                                                                                   |
| OG1291*   | COG0465 | HflB    | ATP-dependent Zn proteases [Posttranslational modification, protein turnover, chaperones].                                                                                         |
| OG1903*   | COG0459 | GroEL   | Chaperonin GroEL (HSP60 family) [Posttranslational modification, protein turnover, chaperones].                                                                                    |
| OG2491    | COG0719 | SufB    | Fe-S cluster assembly scaffold protein SufB [Posttranslational modification, protein turnover, chaperones].                                                                        |
| OG2461    | COG0544 | Tig     | FKBP-type peptidyl-prolyl cis-trans isomerase (trigger factor) [Posttranslational modification, protein turnover, chaperones].                                                     |
| OG2975*   | COG1219 | ClpX    | ATP-dependent protease ClpX, ATPase subunit [Posttranslational modification, protein turnover, chaperones].                                                                        |
| OG4543    | COG0484 | DnaJ    | DnaJ-class molecular chaperone with C-terminal Zn finger domain [Posttranslational modification, protein turnover, chaperones].                                                    |
| OG6664    | COG0755 | CcmC    | ABC-type transport system involved in cytochrome c biogenesis, permease component [Posttranslational modification, protein turnover, chaperones].                                  |
| OG9714    | COG0396 | SufC    | Fe-S cluster assembly ATPase SufC [Posttranslational modification, protein turnover, chaperones].                                                                                  |
| OG12234*  | COG0740 | ClpP    | ATP-dependent protease ClpP, protease subunit [Posttranslational modification, protein turnover, chaperones].                                                                      |
| OG17759*  | COG0691 | SmpB    | tmRNA-binding protein [Posttranslational modification, protein turnover, chaperones].                                                                                              |
| OG25376*  | COG0278 | GrxD    | Glutaredoxin-related protein [Posttranslational modification, protein turnover, chaperones].                                                                                       |
| OG25577*  | COG0526 | TrxA    | Thiol-disulfide isomerase or thioredoxin [Posttranslational modification, protein turnover, chaperones].                                                                           |
| OG907     | COG0642 | BaeS    | Signal transduction histidine kinase [Signal transduction mechanisms].                                                                                                             |
| OG1352*   | COG1217 | TypA    | Predicted membrane GTPase involved in stress response [Signal transduction mechanisms].                                                                                            |
| OG2082*   | COG0467 | RAD55   | RecA-superfamily ATPase, KaiC, GvpD/RAD55 family [Signal transduction mechanisms].                                                                                                 |
| OG4587    | COG0642 | BaeS    | Signal transduction histidine kinase [Signal transduction mechanisms].                                                                                                             |
| OG10988*  | COG0664 | Crp     | cAMP-binding domain of CRP or a regulatory subunit of cAMP-dependent protein kinases [Signal transduction mechanisms].                                                             |
| OG18366   | COG0394 | Wzb     | Protein-tyrosine-phosphatase [Signal transduction mechanisms].                                                                                                                     |
| OG265     | COG0653 | SecA    | Preprotein translocase subunit SecA (ATPase, RNA helicase) [Intracellular trafficking, secretion, and vesicular transport].                                                        |
| OG2397    | COG0541 | Ffh     | Signal recognition particle GTPase [Intracellular trafficking, secretion, and vesicular transport].                                                                                |
| OG2511    | COG0342 | SecD    | Preprotein translocase subunit SecD [Intracellular trafficking, secretion, and vesicular transport].                                                                               |
| OG3395*   | COG0201 | SecY    | Preprotein translocase subunit SecY [Intracellular trafficking, secretion, and vesicular transport].                                                                               |
| OG1420    | COG1132 | MdlB    | ABC-type multidrug transport system, ATPase and permease component [Defense mechanisms].                                                                                           |
| OG1560    | COG1132 | MdlB    | ABC-type multidrug transport system, ATPase and permease component [Defense mechanisms].                                                                                           |
| OG8574    | COG0842 | YadH    | ABC-type multidrug transport system, permease component [Defense mechanisms].                                                                                                      |
| OG14048*  | COG0450 | AhpC    | Alkyl hydroperoxide reductase subunit AhpC (peroxiredoxin) [Defense mechanisms].                                                                                                   |
| OG15254*  | COG1403 | MerA    | 5-methylcytosine-specific restriction endonuclease MerA [Defense mechanisms].                                                                                                      |
| OG1373    | COG0768 | FtsI    | Cell division protein FtsI/penicillin-binding protein 2 [Cell cycle control, cell division, chromosome partitioning, Cell wall/membrane/envelope biogenesis].                      |
| OG783*    | COG1185 | Pnp     | Polyribonucleotide nucleotidyltransferase (polynucleotide phosphorylase) [Translation, ribosomal structure and biogenesis].                                                        |
| OG891*    | COG0480 | FusA    | Translation elongation factor EF-G, a GTPase [Translation, ribosomal structure and biogenesis].                                                                                    |
| OG935*    | COG0595 | RnjA    | mRNA degradation ribonuclease J1/J2 [Translation, ribosomal structure and biogenesis].                                                                                             |
| OG972     | COG0445 | MnmG    | rRNA U34 5-carboxymethylaminomethyl modifying enzyme MnmG/GidA [Translation, ribosomal structure and biogenesis].                                                                  |
| OG2488    | COG0554 | GatA    | Asp-rRNAAsn/Glu-rRNAAGln amidotransferase A subunit or related amidase [Translation, ribosomal structure and biogenesis].                                                          |
| OG2515    | COG0621 | MiaB    | rRNA A37 methylthiotransferase MiaB [Translation, ribosomal structure and biogenesis].                                                                                             |
| OG3424    | COG0172 | SerS    | Seryl-tRNA synthetase [Translation, ribosomal structure and biogenesis].                                                                                                           |
| OG3654    | COG0162 | TyrS    | Tyrosyl-tRNA synthetase [Translation, ribosomal structure and biogenesis].                                                                                                         |
| OG4878*   | COG0539 | RpsA    | Ribosomal protein S1 [Translation, ribosomal structure and biogenesis].                                                                                                            |
| OG5039    | COG0216 | PrfA    | Protein chain release factor A [Translation, ribosomal structure and biogenesis].                                                                                                  |
| OG5194    | COG0012 | GTP1    | Ribosome-binding ATPase YchF, GTP1/OBG family [Translation, ribosomal structure and biogenesis].                                                                                   |
| OG5390    | COG0533 | TsaD    | rRNA A37 threonylcarbamoyltransferase TsaD [Translation, ribosomal structure and biogenesis].                                                                                      |
| OG5757    | COG0223 | Fmt     | Methionyl-tRNA formyltransferase [Translation, ribosomal structure and biogenesis].                                                                                                |
| OG5935    | COG0016 | PheS    | Phenylalanyl-tRNA synthetase alpha subunit [Translation, ribosomal structure and biogenesis].                                                                                      |
| OG6058    | COG1600 | QueG    | Epoxyqueuosine reductase QueG (queuosine biosynthesis) [Translation, ribosomal structure and biogenesis].                                                                          |
| OG6399    | COG0564 | RluA    | Pseudouridylylase, 23S rRNA- or tRNA-specific [Translation, ribosomal structure and biogenesis].                                                                                   |
| OG6588    | COG1234 | ElaC    | Ribonuclease BN, rRNA processing enzyme [Translation, ribosomal structure and biogenesis].                                                                                         |
| OG6946    | COG1159 | Era     | GTPase Era, involved in 16S rRNA processing [Translation, ribosomal structure and biogenesis].                                                                                     |
| OG7548    | COG0101 | TruA    | rRNA U38,U39,U40 pseudouridine synthase TruA [Translation, ribosomal structure and biogenesis].                                                                                    |
| OG7880    | COG1161 | RbgA    | Ribosome biogenesis GTPase A [Translation, ribosomal structure and biogenesis].                                                                                                    |
| OG8167    | COG0566 | SpoU    | rRNA G18 (ribose-2'-O)-methylase SpoU [Translation, ribosomal structure and biogenesis].                                                                                           |
| OG8506    | COG0024 | Map     | Methionine aminopeptidase [Translation, ribosomal structure and biogenesis].                                                                                                       |
| OG9130    | COG1189 | YqxC    | Predicted rRNA methylase YqxC, contains S4 and FtsJ domains [Translation, ribosomal structure and biogenesis].                                                                     |
| OG9541*   | COG0052 | RpsB    | Ribosomal protein S2 [Translation, ribosomal structure and biogenesis].                                                                                                            |
| OG11488*  | COG0081 | RplA    | Ribosomal protein L1 [Translation, ribosomal structure and biogenesis].                                                                                                            |
| OG13244*  | COG0098 | RpsE    | Ribosomal protein S5 [Translation, ribosomal structure and biogenesis].                                                                                                            |
| OG13767   | COG0193 | Ph      | Peptidyl-tRNA hydrolase [Translation, ribosomal structure and biogenesis].                                                                                                         |
| OG14137*  | COG0522 | RpsD    | Ribosomal protein S4 or related protein [Translation, ribosomal structure and biogenesis].                                                                                         |
| OG15443*  | COG0231 | Efp     | Translation elongation factor P (EF-P)/translation initiation factor 5A (eIF-5A) [Translation, ribosomal structure and biogenesis].                                                |
| OG15930*  | COG0233 | Frr     | Ribosome recycling factor [Translation, ribosomal structure and biogenesis].                                                                                                       |
| OG16246   | COG0097 | RplF    | Ribosomal protein L6P/L9E [Translation, ribosomal structure and biogenesis].                                                                                                       |
| OG16323*  | COG0094 | RplE    | Ribosomal protein L5 [Translation, ribosomal structure and biogenesis].                                                                                                            |
| OG16585   | COG0590 | TadA    | tRNA(Arg) A34 adenosine deaminase TadA [Translation, ribosomal structure and biogenesis].                                                                                          |
| OG16960*  | COG0244 | RplJ    | Ribosomal protein L10 [Translation, ribosomal structure and biogenesis].                                                                                                           |
| OG18594*  | COG0049 | RpsG    | Ribosomal protein S7 [Translation, ribosomal structure and biogenesis].                                                                                                            |
| OG19291   | COG0200 | RplO    | Ribosomal protein L15 [Translation, ribosomal structure and biogenesis].                                                                                                           |
| OG19392*  | COG0102 | RplM    | Ribosomal protein L13 [Translation, ribosomal structure and biogenesis].                                                                                                           |
| OG20601   | COG0858 | RbfA    | Ribosome-binding factor A [Translation, ribosomal structure and biogenesis].                                                                                                       |
| OG20776*  | COG0080 | RplK    | Ribosomal protein L11 [Translation, ribosomal structure and biogenesis].                                                                                                           |
| OG21459*  | COG0103 | RpsI    | Ribosomal protein S9 [Translation, ribosomal structure and biogenesis].                                                                                                            |
| OG21598*  | COG0096 | RpsH    | Ribosomal protein S8 [Translation, ribosomal structure and biogenesis].                                                                                                            |
| OG22505*  | COG0048 | RpsL    | Ribosomal protein S12 [Translation, ribosomal structure and biogenesis].                                                                                                           |
| OG23198*  | COG0099 | RpsM    | Ribosomal protein S13 [Translation, ribosomal structure and biogenesis].                                                                                                           |
| OG23416*  | COG0256 | RplR    | Ribosomal protein L18 [Translation, ribosomal structure and biogenesis].                                                                                                           |
| OG24026*  | COG0198 | RplX    | Ribosomal protein L24 [Translation, ribosomal structure and biogenesis].                                                                                                           |
| OG26629*  | COG0089 | RplW    | Ribosomal protein L23 [Translation, ribosomal structure and biogenesis].                                                                                                           |
| OG26634*  | COG0199 | RpsN    | Ribosomal protein S14 [Translation, ribosomal structure and biogenesis].                                                                                                           |
| OG27183*  | COG0254 | RpmE    | Ribosomal protein L31 [Translation, ribosomal structure and biogenesis].                                                                                                           |
| OG27508   | COG0721 | GatC    | Asp-rRNAAsn/Glu-rRNAAGln amidotransferase C subunit [Translation, ribosomal structure and biogenesis].                                                                             |
| OG28588*  | COG0361 | InfA    | Translation initiation factor IF-1 [Translation, ribosomal structure and biogenesis].                                                                                              |
| OG29079*  | COG0184 | RpsO    | Ribosomal protein S15P/S13E [Translation, ribosomal structure and biogenesis].                                                                                                     |
| OG29422*  | COG0211 | RpmA    | Ribosomal protein L27 [Translation, ribosomal structure and biogenesis].                                                                                                           |
| OG31261*  | COG0227 | RpmB    | Ribosomal protein L28 [Translation, ribosomal structure and biogenesis].                                                                                                           |
| OG32944*  | COG0238 | RpsR    | Ribosomal protein S18 [Translation, ribosomal structure and biogenesis].                                                                                                           |
| OG2477*   | COG0195 | NusA    | Transcription antitermination factor NusA, contains S1 and KH domains [Transcription].                                                                                             |
| OG3271*   | COG0568 | RpoD    | DNA-directed RNA polymerase, sigma subunit (sigma70/sigma32) [Transcription].                                                                                                      |
| OG6679*   | COG0583 | LysR    | DNA-binding transcriptional regulator, LysR family [Transcription].                                                                                                                |
| OG7113*   | COG0202 | RpoA    | DNA-directed RNA polymerase, alpha subunit/40 kD subunit [Transcription].                                                                                                          |
| OG12597*  | COG0250 | NusG    | Transcription antitermination factor NusG [Transcription].                                                                                                                         |
| OG16737   | COG1386 | ScpB    | Chromosome segregation and condensation protein ScpB [Transcription].                                                                                                              |
| OG229     | COG0178 | UvrA    | Excinuclease UvrABC ATPase subunit [Replication, recombination and repair].                                                                                                        |
| OG390     | COG0188 | GyrA    | DNA gyrase/topoisomerase IV, subunit A [Replication, recombination and repair].                                                                                                    |
| OG443     | COG1200 | RecG    | RecG-like helicase [Replication, recombination and repair].                                                                                                                        |
| OG495     | COG0210 | UvrD    | Superfamily I DNA or RNA helicase [Replication, recombination and repair].                                                                                                         |
| OG929     | COG0556 | UvrB    | Excinuclease UvrABC helicase subunit UvrB [Replication, recombination and repair].                                                                                                 |
| OG944     | COG0322 | UvrC    | Excinuclease UvrABC, nuclease subunit [Replication, recombination and repair].                                                                                                     |
| OG4412    | COG0592 | DnaN    | DNA polymerase III sliding clamp (beta) subunit, PCNA homolog [Replication, recombination and repair].                                                                             |
| OG4823    | COG2255 | RuvB    | Holliday junction resolvase RuvABC, ATP-dependent DNA helicase subunit [Replication, recombination and repair].                                                                    |
| OG4880    | COG1195 | RecF    | Recombinational DNA repair ATPase RecF [Replication, recombination and repair].                                                                                                    |
| OG7676    | COG0266 | Nci     | Formamidopyrimidine-DNA glycosylase [Replication, recombination and repair].                                                                                                       |
| OG9041    | COG0496 | SurE    | Broad specificity polyphosphatase and 5'/3'-nucleotidase SurE [Replication, recombination and repair].                                                                             |
| OG14257*  | COG0353 | RecR    | Recombinational DNA repair protein RecR [Replication, recombination and repair].                                                                                                   |
| OG22108*  | COG0629 | Ssb     | Single-stranded DNA-binding protein [Replication, recombination and repair].                                                                                                       |
| OG5326    | COG0750 | RseP    | Membrane-associated protease RseP, regulator of RpoE activity [Posttranslational modification, protein turnover, chaperones, Transcription].                                       |
| OG593     | COG0317 | SpoT    | (p)ppGpp synthase/hydrolase, HD superfamily [Signal transduction mechanisms, Transcription].                                                                                       |
| OG9248*   | COG0745 | OmpR    | DNA-binding response regulator, OmpR family, contains REC and winged-helix (wHTH) domain [Signal transduction mechanisms, Transcription].                                          |
| OG10630*  | COG0745 | OmpR    | DNA-binding response regulator, OmpR family, contains REC and winged-helix (wHTH) domain [Signal transduction mechanisms, Transcription].                                          |
| OG10989*  | COG2197 | CibB    | DNA-binding response regulator, NarL/Fix family, contains REC and HTH domains [Signal transduction mechanisms, Transcription].                                                     |
| OG1699*   | COG1008 | NuoM    | NADH:ubiquinone oxidoreductase subunit 4 (chain M) [Energy production and conversion].                                                                                             |
| OG2323*   | COG0056 | AtpA    | FoF1-type ATP synthase, alpha subunit [Energy production and conversion].                                                                                                          |
| OG2575    | COG1249 | Lpd     | Pyruvate-2-oxoglutarate dehydrogenase complex, dihydrolipoamide dehydrogenase (E3) component or related enzyme [Energy production and conversion].                                 |
| OG2577*   | COG0055 | AtpD    | FoF1-type ATP synthase, beta subunit [Energy production and conversion].                                                                                                           |
| OG2710*   | COG0644 | FixC    | Dehydrogenase (flavoprotein) [Energy production and conversion].                                                                                                                   |
| OG4536*   | COG1005 | NuoH    | NADH:ubiquinone oxidoreductase subunit 1 (chain H) [Energy production and conversion].                                                                                             |
| OG4848*   | COG1071 | AcoA    | TPP-dependent pyruvate or acetoacetyl dehydrogenase subunit alpha [Energy production and conversion].                                                                              |
| OG6952    | COG0224 | AtpG    | FoF1-type ATP synthase, gamma subunit [Energy production and conversion].                                                                                                          |
| OG10155*  | COG0377 | NuoB    | NADH:ubiquinone oxidoreductase 20 kD subunit (chain B) or related Fe-S oxidoreductase [Energy production and conversion].                                                          |
| OG14604*  | COG0839 | NuoJ    | NADH:ubiquinone oxidoreductase subunit 6 (chain J) [Energy production and conversion].                                                                                             |
| OG15982*  | COG0723 | QcrA    | Rieske Fe-S protein [Energy production and conversion].                                                                                                                            |
| OG16389*  | COG0712 | AtpH    | FoF1-type ATP synthase, delta subunit [Energy production and conversion].                                                                                                          |
| OG21795*  | COG0355 | AtpC    | FoF1-type ATP synthase, epsilon subunit [Energy production and conversion].                                                                                                        |
| OG23609   | COG0838 | NuoA    | NADH:ubiquinone oxidoreductase subunit 3 (chain A) [Energy production and conversion].                                                                                             |
| OG25542*  | COG0713 | NuoK    | NADH:ubiquinone oxidoreductase subunit 11 or 4L (chain K) [Energy production and conversion].                                                                                      |
| OG1837    | COG0119 | LeuA    | Isopropylmalate/homocitrate/citramalate synthases [Amino acid transport and metabolism].                                                                                           |
| OG2870    | COG0019 | LysA    | Diaminopimelate decarboxylase [Amino acid transport and metabolism].                                                                                                               |
| OG3131    | COG0141 | HisD    | Histidinol dehydrogenase [Amino acid transport and metabolism].                                                                                                                    |
| OG3348    | COG0460 | ThrA    | Homoserine dehydrogenase [Amino acid transport and metabolism].                                                                                                                    |
| OG3426    | COG0112 | GlyA    | Glycine/serine hydroxymethyltransferase [Amino acid transport and metabolism].                                                                                                     |
| OG4135    | COG4992 | ArgD    | Acetylornithine/succinyl-diaminopimelate/putrescine aminotransferase [Amino acid transport and metabolism].                                                                        |
| OG4171    | COG0436 | AspB    | Aspartate/methionine/tyrosine aminotransferase [Amino acid transport and metabolism].                                                                                              |
| OG4947    | COG0337 | AroB    | 3-dehydroquinate synthetase [Amino acid transport and metabolism].                                                                                                                 |
| OG5079    | COG0263 | ProB    | Glutamate 5-kinase [Amino acid transport and metabolism].                                                                                                                          |
| OG5810    | COG0136 | Asd     | Aspartate-semialdehyde dehydrogenase [Amino acid transport and metabolism].                                                                                                        |
| OG6960    | COG0083 | ThrB    | Homoserine kinase [Amino acid transport and metabolism].                                                                                                                           |
| OG7112    | COG0287 | TyrA    | Prephenate dehydrogenase [Amino acid transport and metabolism].                                                                                                                    |
| OG7727    | COG0685 | MetF    | 5,10-methylenetetrahydrofolate reductase [Amino acid transport and metabolism].                                                                                                    |
| OG10138   | COG0106 | HisA    | Phosphoribosylformimino-5-aminoimidazole carboxamide ribonucleotide (ProFAR) isomerase [Amino acid transport and metabolism].                                                      |
| OG11912   | COG0135 | TpF     | Phosphoribosylamidoimidazole isomerase [Amino acid transport and metabolism].                                                                                                      |
| OG12701   | COG0040 | HisG    | ATP phosphoribosyltransferase [Amino acid transport and metabolism].                                                                                                               |
| OG17107*  | COG0440 | IlvH    | Acetolactate synthase, small subunit [Amino acid transport and metabolism].                                                                                                        |
| OG22052*  | COG0509 | GcvH    | Glycine cleavage system H protein (lipoate-binding) [Amino acid transport and metabolism].                                                                                         |
| OG2375    | COG0034 | PurF    | Glutamine phosphoribosylpyrophosphate amidotransferase [Nucleotide transport and metabolism].                                                                                      |
| OG3322*   | COG0015 | PurB    | Adenylosuccinate lyase [Nucleotide transport and metabolism].                                                                                                                      |
| OG7387*   | COG0061 | NadF    | NAD kinase [Nucleotide transport and metabolism].                                                                                                                                  |
| OG11355   | COG0528 | PyrH    | Uridylate kinase [Nucleotide transport and metabolism].                                                                                                                            |
| OG15375   | COG0194 | Gmk     | Guanylate kinase [Nucleotide transport and metabolism].                                                                                                                            |
| OG15941   | COG0563 | Adk     | Adenylate kinase or related kinase [Nucleotide transport and metabolism].                                                                                                          |
| OG1418*   | COG0469 | PykF    | Pyruvate kinase [Carbohydrate transport and metabolism].                                                                                                                           |
| OG1775    | COG0696 | GpmI    | Phosphoglycerate mutase (BPG-independent, AlkP superfamily) [Carbohydrate transport and metabolism].                                                                               |
| OG1885    | COG1543 | COG1543 | Predicted glycosyl hydrolase, contains GH57 and DUF1957 domains [Carbohydrate transport and metabolism].                                                                           |
| OG2085*   | COG0364 | Zwf     | Glucose-6-phosphate 1-dehydrogenase [Carbohydrate transport and metabolism].                                                                                                       |
| OG2129*   | COG0297 | GlgA    | Glycogen synthase [Carbohydrate transport and metabolism].                                                                                                                         |
| OG2430    | COG1109 | ManB    | Phosphomannomutase [Carbohydrate transport and metabolism].                                                                                                                        |
| OG3103    | COG0406 | PhoE    | Broad specificity phosphatase PhoE [Carbohydrate transport and metabolism].                                                                                                        |
| OG3332*   | COG0448 | GlgC    | ADP-glucose pyrophosphorylase [Carbohydrate transport and metabolism].                                                                                                             |
| OG4126*   | COG0126 | Pgk     | 3-phosphoglycerate kinase [Carbohydrate transport and metabolism].                                                                                                                 |
| OG5742*   | COG0057 | GapA    | Glyceraldehyde-3-phosphate dehydrogenase/erythrose-4-phosphate dehydrogenase [Carbohydrate transport and metabolism].                                                              |
| OG6085*   | COG1494 | GlpX    | Fructose-1,6-bisphosphatase/sedoheptulose 1,7-bisphosphatase or related protein [Carbohydrate transport and metabolism].                                                           |
| OG7852    | COG0483 | SubB    | Archaeal fructose-1,6-bisphosphatase or related enzyme of inositol monophosphatase family [Carbohydrate transport and metabolism].                                                 |
| OG10721   | COG0149 | TpiA    | Triosephosphate isomerase [Carbohydrate transport and metabolism].                                                                                                                 |
| OG11531   | COG0120 | RpiA    | Ribose 5-phosphate isomerase [Carbohydrate transport and metabolism].                                                                                                              |
| OG64      | COG1429 | CobN    | Cobalamin biosynthesis protein CobN, Mg-chelatase [Coenzyme transport and metabolism].                                                                                             |
| OG1524*   | COG0108 | RibB    | 3,4-dihydroxy-2-butanone 4-phosphate synthase [Coenzyme transport and metabolism].                                                                                                 |
| OG1634    | COG0171 | NadE    | NH3-dependent NAD+ synthetase [Coenzyme transport and metabolism].                                                                                                                 |
| OG2655*   | COG0422 | ThiC    | Thiamine biosynthesis protein ThiC [Coenzyme transport and metabolism].                                                                                                            |
| OG3338*   | COG0001 | HemL    | Glutamate-1-semialdehyde aminotransferase [Coenzyme transport and metabolism].                                                                                                     |
| OG3341    | COG0373 | HemA    | Glutamyl-tRNA reductase [Coenzyme transport and metabolism].                                                                                                                       |
| OG5256*   | COG1239 | ChlI    | Mg-chelatase subunit ChlI [Coenzyme transport and metabolism].                                                                                                                     |
| OG5429    | COG0352 | ThiE    | Thiamine monophosphate synthase [Coenzyme transport and metabolism].                                                                                                               |
| OG5535    | COG0379 | NadA    | Quinolinate synthase [Coenzyme transport and metabolism].                                                                                                                          |
| OG6659*   | COG0142 | IspA    | Geranylgeranyl pyrophosphate synthase [Coenzyme transport and metabolism].                                                                                                         |
| OG6798*   | COG0382 | UbiA    | 4-hydroxybenzoate polyphrenyltransferase [Coenzyme transport and metabolism].                                                                                                      |
| OG6889*   | COG0181 | HemC    | Prophobilinogen deaminase [Coenzyme transport and metabolism].                                                                                                                     |
| OG6983    | COG0320 | LipA    | Lipoate synthase [Coenzyme transport and metabolism].                                                                                                                              |
| OG7197    | COG0196 | RibF    | FAD synthase [Coenzyme transport and metabolism].                                                                                                                                  |
| OG7620    | COG0190 | FoD     | 5,10-methylene-tetrahydrofolate dehydrogenase/Methenyl tetrahydrofolate cyclohydrolase [Coenzyme transport and metabolism].                                                        |
| OG9475    | COG0007 | CysG    | Uroporphyrinogen-III methylase (siroheme synthase) [Coenzyme transport and metabolism].                                                                                            |
| OG16135   | COG0054 | RibE    | 6,7-dimethyl-8-ribitylmethine synthase (Riboflavin synthase beta chain) [Coenzyme transport and metabolism].                                                                       |
| OG17443*  | COG0669 | CoaD    | Phosphopantetheine adenylyltransferase [Coenzyme transport and metabolism].                                                                                                        |
| OG5924    | COG0332 | FabH    | 3-oxoacyl-[acyl-carrier-protein] synthase III [Lipid transport and metabolism].                                                                                                    |
| OG6668    | COG1562 | ERG9    | Phytoene/squalene synthetase [Lipid transport and metabolism].                                                                                                                     |
| OG7447    | COG0331 | FabD    | Malonyl CoA-acyl carrier protein transacylase [Lipid transport and metabolism].                                                                                                    |
| OG7697    | COG0575 | CdsA    | CDP-diglyceride synthetase [Lipid transport and metabolism].                                                                                                                       |
| OG7764*   | COG0777 | AccD    | Acetyl-CoA carboxylase beta subunit [Lipid transport and metabolism].                                                                                                              |
| OG11745   | COG0204 | PlsC    | 1-acyl-sn-glycerol-3-phosphate acyltransferase [Lipid transport and metabolism].                                                                                                   |
| OG18593*  | COG0764 | FabA    | 3-hydroxymeristoyl-3-phosphatidyl-acyl carrier protein) dehydratase [Lipid transport and metabolism].                                                                              |
| OG7445    | COG0329 | DapA    | Dihydrodipicolinate synthase/N-acetylneuraminate lyase [Amino acid transport and metabolism, Cell wall/membrane/envelope biogenesis].                                              |
| OG1656    | COG0661 | AarF    | Predicted unusual protein kinase regulating ubiquitinone biosynthesis, AarF/ABC1/UbiB family [Coenzyme transport and metabolism, Signal transduction mechanisms].                  |
| OG6915    | COG0189 | RimK    | Glutathione synthase/RimK-type ligase, ATP-grasp superfamily [Coenzyme transport and metabolism, Translation, ribosomal structure and biogenesis].                                 |
| OG5150    | COG0473 | LeuB    | Isoictrate/isopropylmalate dehydrogenase [Energy production and conversion, Amino acid transport and metabolism].                                                                  |
| OG148     | COG0458 | CarB    | Carbamoylphosphate synthase large subunit [Amino acid transport and metabolism, Nucleotide transport and metabolism].                                                              |
| OG6196    | COG0059 | IlvC    | Ketol-acid reductoisomerase [Amino acid transport and metabolism, Coenzyme transport and metabolism].                                                                              |
| OG2943    | COG0391 | CoID    | Archaeal 2-phospho-L-lactate transferase/Bacterial gluconogenesis factor, CoID/UPF0052 family [Coenzyme transport and metabolism, Carbohydrate transport and metabolism].          |
| OG1087    | COG1154 | Dss     | Deoxyxylulose-5-phosphate synthase [Coenzyme transport and metabolism, Lipid transport and metabolism].                                                                            |
| OG24322   | COG0537 | Hit     | Diadenosine tetraphosphate (Ap4A) hydrolase or other HIT family hydrolase [Nucleotide transport and metabolism, Carbohydrate transport and metabolism, General function prediction |

Table S5 Classification of amino acids by two independent schemes based on physiochemical properties of the amino acids.

---

|                                                     |
|-----------------------------------------------------|
| Classification by charge (Hughes et al., 1990)      |
| Positive R, H, K                                    |
| Negative D, E                                       |
| Neutral A, N, C, Q, G, I, L, M, F, P, S, T, W, Y, V |

---

|                                                             |
|-------------------------------------------------------------|
| Classification by volume and polarity (Miyata et al., 1979) |
| Special C                                                   |
| Neutral and small A, G, P, S, T                             |
| Polar and relative small N, Q, D, E                         |
| Polar and relative large R, H, K                            |
| Nonpolar and relatively small I, L, M, V                    |
| Nonpolar and relatively large F, W, Y                       |

---

Hughes, A.L., Ota, T., and Nei, M. (1990) Positive Darwinian selection promotes charge profile diversity in the antigen-binding cleft of class I major-histocompatibility-complex molecules. *Molecular biology and evolution* 7: 515-524.

Miyata, T., Miyazawa, S., and Yasunaga, T. (1979) Two types of amino acid substitutions in protein evolution. *Journal of Molecular Evolution* 12: 219-236.
